# Supplementary material for: Polyhalogenated aminobenzonitrilesvs.their co-crystals with 18-crown-6: amino group position as a tool to control crystal packing and solid-state fluorescence
Source: Royal Society of Chemistry journal article supplement (doi:10.1039/d1ce01469b), 2021-12-20
Supplement: d1ce01469b1.pdf [file d1ce01469b1.pdf]

**Polyhalogenated aminobenzonitriles vs their co-crystals with 18-crown-6:  
amino group position as a tool to control crystal packing and solid-state fluorescence**

Tamara A. Vaganova,<sup>\*a</sup> Enrico Benassi,<sup>\*b</sup> Yuriy V. Gatilov,<sup>a</sup> Igor P. Chuikov,<sup>a</sup> Denis P. Pishchur,<sup>c</sup>  
and Evgenij V. Malykhin<sup>a</sup>

<sup>a</sup> N.N. Vorozhtsov Novosibirsk Institute of Organic Chemistry, Siberian Branch of the Russian Academy of Sciences, 9 Lavrentiev Avenue, 630090 Novosibirsk, Russian Federation. E-mail: [vaganova@nioch.nsc.ru](mailto:vaganova@nioch.nsc.ru)

<sup>b</sup> Novosibirsk State University, 2 Pirogova Avenue, 630090 Novosibirsk, Russian Federation. E-mail: [ebenassi3@gmail.com](mailto:ebenassi3@gmail.com)

<sup>c</sup> Nikolaev Institute of Inorganic Chemistry, Siberian Branch of the Russian Academy of Sciences, 3 Lavrentiev Avenue, 630090 Novosibirsk, Russian Federation.

**Table S1** Crystallographic data and structure refinement parameters of the aminobenzonitrile crystals and co-crystals

|                                                                                                                | <b>B<sub>2</sub>·cr</b>                                                                                        | <b>C<sub>2</sub>·cr</b>                                                                                        | <b>D<sub>2</sub>·cr</b>                                                                            | <b>E<sub>2</sub>·cr</b>                                                                                          |
|----------------------------------------------------------------------------------------------------------------|----------------------------------------------------------------------------------------------------------------|----------------------------------------------------------------------------------------------------------------|----------------------------------------------------------------------------------------------------|------------------------------------------------------------------------------------------------------------------|
| Crystal data                                                                                                   |                                                                                                                |                                                                                                                |                                                                                                    |                                                                                                                  |
| Chemical formula                                                                                               | 2(C <sub>7</sub> H <sub>3</sub> F <sub>3</sub> N <sub>2</sub> )·C <sub>12</sub> H <sub>24</sub> O <sub>6</sub> | 2(C <sub>7</sub> H <sub>3</sub> F <sub>3</sub> N <sub>2</sub> )·C <sub>12</sub> H <sub>24</sub> O <sub>6</sub> | 2(C <sub>7</sub> H <sub>2</sub> ClF <sub>3</sub> N)·C <sub>12</sub> H <sub>24</sub> O <sub>6</sub> | 2(C <sub>7</sub> H <sub>3</sub> ClF <sub>2</sub> N <sub>2</sub> )·C <sub>12</sub> H <sub>24</sub> O <sub>6</sub> |
| <i>M<sub>r</sub></i>                                                                                           | 608.54                                                                                                         | 608.54                                                                                                         | 677.42                                                                                             | 641.44                                                                                                           |
| Crystal system, space group                                                                                    | Monoclinic, <i>C2/c</i>                                                                                        | Monoclinic, <i>C2/c</i>                                                                                        | Triclinic, <i>P</i> <sup>-1</sup>                                                                  | Triclinic, <i>P</i> <sup>-1</sup>                                                                                |
| Temperature (K)                                                                                                | 296                                                                                                            | 296                                                                                                            | 296                                                                                                | 296                                                                                                              |
| <i>a</i> , <i>b</i> , <i>c</i> (Å)                                                                             | 14.4786 (6),<br>11.6381 (6),<br>34.8047 (16)                                                                   | 14.4590 (6),<br>11.6131 (6),<br>34.7535 (15)                                                                   | 9.4276 (6),<br>9.9092 (6),<br>10.3213 (7)                                                          | 9.2760 (4),<br>9.8840 (5),<br>10.2679 (5)                                                                        |
| $\alpha$ , $\beta$ , $\gamma$ (°)                                                                              | 90, 90.017 (3),<br>90                                                                                          | 90, 90.333 (3),<br>90                                                                                          | 111.749 (2),<br>97.219 (3),<br>116.798 (2)                                                         | 111.106 (2),<br>98.506 (2),<br>116.108 (2)                                                                       |
| <i>V</i> (Å <sup>3</sup> )                                                                                     | 5864.7 (5)                                                                                                     | 5835.5 (5)                                                                                                     | 747.91 (8)                                                                                         | 734.00 (6)                                                                                                       |
| <i>Z</i>                                                                                                       | 8                                                                                                              | 8                                                                                                              | 1                                                                                                  | 1                                                                                                                |
| $\mu$ (mm <sup>-1</sup> )                                                                                      | 0.12                                                                                                           | 0.12                                                                                                           | 0.30                                                                                               | 0.29                                                                                                             |
| Crystal size (mm)                                                                                              | 0.58 × 0.20 ×<br>0.15                                                                                          | 0.59 × 0.11 ×<br>0.06                                                                                          | 0.57 × 0.39 ×<br>0.31                                                                              | 0.58 × 0.52 ×<br>0.16                                                                                            |
| Data collection                                                                                                |                                                                                                                |                                                                                                                |                                                                                                    |                                                                                                                  |
| <i>T</i> <sub>min</sub> , <i>T</i> <sub>max</sub>                                                              | 0.863, 0.956                                                                                                   | 0.896, 0.954                                                                                                   | 0.806, 0.837                                                                                       | 0.772, 0.837                                                                                                     |
| No. of measured, independent and observed [ <i>I</i> > 2σ( <i>I</i> )] reflections                             | 16444, 5311,<br>2751                                                                                           | 24213, 5505,<br>3834                                                                                           | 20110, 3585,<br>3092                                                                               | 20065, 3547,<br>3009                                                                                             |
| <i>R</i> <sub>int</sub>                                                                                        | 0.029                                                                                                          | 0.059                                                                                                          | 0.023                                                                                              | 0.023                                                                                                            |
| (sin θ/λ) <sub>max</sub> (Å <sup>-1</sup> )                                                                    | 0.600                                                                                                          | 0.612                                                                                                          | 0.659                                                                                              | 0.661                                                                                                            |
| Refinement                                                                                                     |                                                                                                                |                                                                                                                |                                                                                                    |                                                                                                                  |
| <i>R</i> [ <i>F</i> <sup>2</sup> > 2σ( <i>F</i> <sup>2</sup> )], <i>wR</i> ( <i>F</i> <sup>2</sup> ), <i>S</i> | 0.130, 0.435,<br>1.48                                                                                          | 0.088, 0.294,<br>0.95                                                                                          | 0.036, 0.099,<br>1.03                                                                              | 0.037, 0.111,<br>1.03                                                                                            |
| No. of reflections                                                                                             | 5311                                                                                                           | 5505                                                                                                           | 3585                                                                                               | 3547                                                                                                             |
| No. of parameters                                                                                              | 378                                                                                                            | 385                                                                                                            | 207                                                                                                | 198                                                                                                              |
| No. of restraints                                                                                              | 546                                                                                                            | 673                                                                                                            | 2                                                                                                  | 2                                                                                                                |
| H-atom treatment                                                                                               | H-atom parameters constrained                                                                                  | H-atom parameters constrained                                                                                  | H atoms treated by a mixture of independent and constrained refinement                             | H atoms treated by a mixture of independent and constrained refinement                                           |
| $\Delta$ <sub>max</sub> , $\Delta$ <sub>min</sub> (e Å <sup>-3</sup> )                                         | 0.57, -0.41                                                                                                    | 0.56, -0.39                                                                                                    | 0.34, -0.34                                                                                        | 0.33, -0.30                                                                                                      |
| Absolute structure                                                                                             | –                                                                                                              | –                                                                                                              | –                                                                                                  | –                                                                                                                |
| Absolute structure parameter                                                                                   | –                                                                                                              | –                                                                                                              | –                                                                                                  | –                                                                                                                |

**Table S1** Crystallographic data and structure refinement parameters of the of the aminobenzonitrile crystals and co-crystals (continued)

|                                                                                                                | <b>B</b>                                                               | <b>C</b>                                                                                                                                                                                                               | <b>D</b>                                                      | <b>E</b>                                                               |
|----------------------------------------------------------------------------------------------------------------|------------------------------------------------------------------------|------------------------------------------------------------------------------------------------------------------------------------------------------------------------------------------------------------------------|---------------------------------------------------------------|------------------------------------------------------------------------|
| Crystal data                                                                                                   |                                                                        |                                                                                                                                                                                                                        |                                                               |                                                                        |
| Chemical formula                                                                                               | C <sub>7</sub> H <sub>3</sub> F <sub>3</sub> N <sub>2</sub>            | C <sub>7</sub> H <sub>3</sub> F <sub>3</sub> N <sub>2</sub>                                                                                                                                                            | C <sub>7</sub> H <sub>2</sub> ClF <sub>3</sub> N <sub>2</sub> | C <sub>7</sub> H <sub>2</sub> ClF <sub>2</sub> N <sub>2</sub>          |
| <i>M</i> <sub>r</sub>                                                                                          | 172.11                                                                 | 172.11                                                                                                                                                                                                                 | 206.56                                                        | 187.56                                                                 |
| Crystal system, space group                                                                                    | Monoclinic, <i>P</i> 2 <sub>1</sub> / <i>c</i>                         | Monoclinic, <i>P</i> 2 <sub>1</sub>                                                                                                                                                                                    | Monoclinic, <i>C</i> 2/ <i>m</i>                              | Monoclinic, <i>P</i> 2 <sub>1</sub> / <i>c</i>                         |
| Temperature (K)                                                                                                | 296                                                                    | 200                                                                                                                                                                                                                    | 296                                                           | 296                                                                    |
| <i>a</i> , <i>b</i> , <i>c</i> (Å)                                                                             | 7.5702 (5), 5.8303 (3), 15.8912 (11)                                   | 3.7360 (7), 8.4997 (17), 10.654 (2)                                                                                                                                                                                    | 9.7777 (19), 7.7816 (15), 10.2460 (16)                        | 7.6581 (3), 7.3941 (3), 13.4241 (6)                                    |
| α, β, γ (°)                                                                                                    | 90, 96.846 (3), 90                                                     | 90, 96.061 (7), 90                                                                                                                                                                                                     | 99.955 (8)                                                    | 90, 98.090 (2), 90                                                     |
| <i>V</i> (Å <sup>3</sup> )                                                                                     | 696.38 (8)                                                             | 336.44 (12)                                                                                                                                                                                                            | 767.8 (2)                                                     | 752.57 (5)                                                             |
| <i>Z</i>                                                                                                       | 4                                                                      | 2                                                                                                                                                                                                                      | 4                                                             | 4                                                                      |
| μ (mm <sup>-1</sup> )                                                                                          | 0.16                                                                   | 0.16                                                                                                                                                                                                                   | 0.50                                                          | 0.48                                                                   |
| Crystal size (mm)                                                                                              | 0.61 × 0.28 × 0.08                                                     | 0.37 × 0.27 × 0.12                                                                                                                                                                                                     | 0.66 × 0.42 × 0.38                                            | 0.51 × 0.19 × 0.14                                                     |
| Data collection                                                                                                |                                                                        |                                                                                                                                                                                                                        |                                                               |                                                                        |
| <i>T</i> <sub>min</sub> , <i>T</i> <sub>max</sub>                                                              | 0.852, 0.956                                                           | 0.819, 0.971                                                                                                                                                                                                           |                                                               | 0.833, 0.888                                                           |
| No. of measured, independent and observed [ <i>I</i> > 2σ( <i>I</i> )] reflections                             | 7627, 1587, 1084                                                       | 2291, 1092, 990                                                                                                                                                                                                        | 3105, 799, 505                                                | 7523, 1792, 1445                                                       |
| <i>R</i> <sub>int</sub>                                                                                        | 0.027                                                                  | 0.033                                                                                                                                                                                                                  | 0.023                                                         | 0.048                                                                  |
| (sin θ/λ) <sub>max</sub> (Å <sup>-1</sup> )                                                                    | 0.650                                                                  | 0.613                                                                                                                                                                                                                  | 0.620                                                         | 0.658                                                                  |
| Refinement                                                                                                     |                                                                        |                                                                                                                                                                                                                        |                                                               |                                                                        |
| <i>R</i> [ <i>F</i> <sup>2</sup> > 2σ( <i>F</i> <sup>2</sup> )], <i>wR</i> ( <i>F</i> <sup>2</sup> ), <i>S</i> | 0.046, 0.141, 1.03                                                     | 0.033, 0.102, 0.82                                                                                                                                                                                                     | 0.096, 0.282, 1.02                                            | 0.040, 0.122, 1.06                                                     |
| No. of reflections                                                                                             | 1587                                                                   | 1092                                                                                                                                                                                                                   | 799                                                           | 1792                                                                   |
| No. of parameters                                                                                              | 117                                                                    | 117                                                                                                                                                                                                                    | 67                                                            | 117                                                                    |
| No. of restraints                                                                                              | 2                                                                      | 3                                                                                                                                                                                                                      |                                                               | 2                                                                      |
| H-atom treatment                                                                                               | H atoms treated by a mixture of independent and constrained refinement | H atoms treated by a mixture of independent and constrained refinement                                                                                                                                                 | H-atom parameters constrained                                 | H atoms treated by a mixture of independent and constrained refinement |
| Δ <sub>max</sub> , Δ <sub>min</sub> (e Å <sup>-3</sup> )                                                       | 0.20, -0.15                                                            | 0.16, -0.19                                                                                                                                                                                                            | 0.37, -0.41                                                   | 0.27, -0.31                                                            |
| Absolute structure                                                                                             | –                                                                      | Flack <i>x</i> determined using 353 quotients [( <i>I</i> <sup>+</sup> )-( <i>I</i> <sup>-</sup> )]/[( <i>I</i> <sup>+</sup> )+( <i>I</i> <sup>-</sup> )] (Parsons, Flack and Wagner, Acta Cryst. B69 (2013) 249-259). |                                                               | –                                                                      |
| Absolute structure parameter                                                                                   | –                                                                      | -0.6 (6)                                                                                                                                                                                                               |                                                               | –                                                                      |

### Short description of asymmetric units and co-formers geometry in the crystals.

The asymmetric units of isostructural crystals  $\mathbf{B}_2 \cdot \mathbf{cr}$  and  $\mathbf{C}_2 \cdot \mathbf{cr}$  have  $\mathbf{cr}$  molecules and two amine molecules in general positions. The asymmetric units of isostructural crystals  $\mathbf{D}_2 \cdot \mathbf{cr}$  and  $\mathbf{E}_2 \cdot \mathbf{cr}$  have one amine molecule in a general position and half of  $\mathbf{cr}$  molecules at the inversion centre in the  $P-1$  structure. The asymmetric units of individual aminobenzonitriles  $\mathbf{B}$ ,  $\mathbf{C}$  and  $\mathbf{E}$  have one molecule in general positions. The asymmetric unit of individual aminobenzonitrile  $\mathbf{D}$  has half of molecule at a mirror plane lying orthogonally in this  $C2/m$  structure. Difference-map plots made with data on all the crystals confirm that all H atoms of the  $\mathbf{cr}$  and amines molecules were located correctly. The conformation of the 18-crown-6 molecules in the co-crystals  $\mathbf{B}_2 \cdot \mathbf{cr}$  and  $\mathbf{C}_2 \cdot \mathbf{cr}$  is close to the classical crown 3(TGT,T-GT), where T stands for trans, G stands for gauche; in the co-crystals  $\mathbf{D}_2 \cdot \mathbf{cr}$  and  $\mathbf{E}_2 \cdot \mathbf{cr}$  there is the centrosymmetrical conformation 2(TGT,TGT,GGT). The bond lengths in the individual and associated with crown ether arylamines  $\mathbf{B} - \mathbf{E}$  are approximately the same. In all the individual arylamines and most co-crystals, the sum of 1,3-angles at the amino nitrogen atom is close to  $360^\circ$ , i.e. the amino group has a planar structure and is conjugated with an aromatic ring. A slight deviation from planarity is observed only in the co-crystals  $\mathbf{D}_2 \cdot \mathbf{cr}$  and  $\mathbf{E}_2 \cdot \mathbf{cr}$  (the angles sum is  $\sim 343$  and  $346^\circ$ ).

**Table S2** Hydrogen bonding in the aminobenzonitrile crystals and co-crystals

| Associate <sup>a</sup>                | Interaction<br>D-H...A | <i>I</i> <sub>D-H</sub> (Å) | <i>I</i> <sub>H...A</sub> (Å) | <i>I</i> <sub>D...A</sub> (Å) | Angle<br>D-H...A<br>(deg) | Symmetry code<br>for acceptor |
|---------------------------------------|------------------------|-----------------------------|-------------------------------|-------------------------------|---------------------------|-------------------------------|
| <b>A<sub>2</sub>·cr<sup>b,c</sup></b> | N(1)-H(1A)...O(3)      | 0.88                        | 2.22                          | 2.89(2)                       | 133                       |                               |
|                                       | N(1)-H(1A)...O(4)      | 0.88                        | 2.46                          | 3.10(2)                       | 131                       |                               |
|                                       | N(1)-H(1B)...O(1)      | 0.88                        | 2.53                          | 3.37(3)                       | 160                       |                               |
|                                       | N(3)-H(3A)...O(2)      | 0.88                        | 2.21                          | 3.06(1)                       | 162                       | 1-x, 1-y, 1-z                 |
|                                       | N(3)-H(3B)...O(4)      | 0.88                        | 2.21                          | 3.08(1)                       | 169                       | 1-x, 1-y, 1-z                 |
|                                       | C(20)-H(20A)...F(1)    | 0.99                        | 2.40                          | 3.21(2)                       | 138                       |                               |
|                                       | C(25)-H(25B)...F(4)    | 0.99                        | 2.32                          | 3.14(2)                       | 139                       |                               |
|                                       | C(22)-H(22B)...F(5)    | 0.99                        | 2.46                          | 3.26(2)                       | 137                       | 1-x,1-y,1-z                   |
|                                       | C(26)-H(26A)...F(5)    | 0.99                        | 2.48                          | 3.461(19)                     | 170                       | 3/2-x,1/2-y,1-z               |
|                                       | C(15)-H(15A)...F(8)    | 0.99                        | 2.44                          | 3.24(2)                       | 138                       | 1-x,1-y,1-z                   |
|                                       | C(23)-H(23B)...F(8)    | 0.99                        | 2.47                          | 3.447(2)                      | 169                       | 1/2-x,1/2-y,1-z               |
| <b>B<sub>2</sub>·cr<sup>b</sup></b>   | N(1)-H(1)...O(5)       | 0.86                        | 2.34                          | 3.150(13)                     | 157                       |                               |
|                                       | N(1)-H(2)...O(1)       | 0.86                        | 2.15                          | 2.990(11)                     | 164                       |                               |
|                                       | N(3)-H(3)...O(6)       | 0.86                        | 2.21                          | 3.000(8)                      | 153                       |                               |
|                                       | N(3)-H(4)...O(4)       | 0.86                        | 2.30                          | 3.149(15)                     | 153                       |                               |
|                                       | C(21)-H(21A)...F(2)    | 0.97                        | 2.28                          | 3.14(2)                       | 148                       |                               |
|                                       | C(26)-H(26B)...F(4)    | 0.97                        | 2.46                          | 3.357(19)                     | 154                       | 3/2-x,1/2+y,1/2-z             |
|                                       | C(26)-H(26A)...F(5)    | 0.97                        | 1.98                          | 2.95(2)                       | 174                       |                               |
| <b>C<sub>2</sub>·cr<sup>b</sup></b>   | N(1)-H(1)...O(6)       | 0.86                        | 2.38                          | 3.220(6)                      | 164                       |                               |
|                                       | N(1)-H(2)...O(2)       | 0.86                        | 2.18                          | 3.027(6)                      | 167                       |                               |
|                                       | N(3)-H(3)...O(5)       | 0.86                        | 2.27                          | 3.098(7)                      | 162                       |                               |
|                                       | N(3)-H(4)...O(1)       | 0.86                        | 2.22                          | 3.066(5)                      | 168                       |                               |
|                                       | C(23)-H(23A)...F(2)    | 0.97                        | 2.46                          | 3.261(10)                     | 140                       |                               |
|                                       | C(21)-H(21B)...F(6)    | 0.97                        | 2.41                          | 3.235(8)                      | 143                       |                               |
| <b>D<sub>2</sub>·cr</b>               | N(1)-H(1)...O(2)       | 0.854(18)                   | 2.295(18)                     | 3.1366(17)                    | 168.9(19)                 | 1-x,1-y,1-z                   |
|                                       | N(1)-H(2)...O(2)       | 0.877(19)                   | 2.28(2)                       | 3.095(2)                      | 155.7(18)                 |                               |
|                                       | N(1)-H(2)...O(3)       | 0.877(19)                   | 2.54(2)                       | 3.118(2)                      | 124.3(17)                 |                               |
|                                       | C(12)-H(12B)...F(2)    | 0.97                        | 2.55                          | 3.137(8)                      | 119                       | -1+x,-1+y,-1+z                |
| <b>E<sub>2</sub>·cr</b>               | N(1)-H(1)...O(2)       | 0.868(19)                   | 2.32(2)                       | 3.118(2)                      | 153.8(18)                 | x,-1+y,z                      |
|                                       | N(1)-H(1)...O(3)       | 0.868(19)                   | 2.55(2)                       | 3.129(2)                      | 125.0(16)                 | x,-1+y,z                      |
|                                       | N(1)-H(2)...O(2)       | 0.863(18)                   | 2.273(18)                     | 3.1216(18)                    | 167.7(19)                 | 1-x,1-y,-z                    |

**Table S2** Hydrogen bonding in the aminobenzonitrile crystals and co-crystals (continued)

| Associate <sup>a</sup> | Interaction<br>D-H...A | <i>l</i> <sub>D-H</sub> (Å) | <i>l</i> <sub>H...A</sub> (Å) | <i>l</i> <sub>D...A</sub> (Å) | Angle<br>D-H...A<br>(deg) | Symmetry code<br>for acceptor |
|------------------------|------------------------|-----------------------------|-------------------------------|-------------------------------|---------------------------|-------------------------------|
| <b>A</b> <sup>d</sup>  | N(1)-H(1A)...N(2')     | 1.00(2)                     | 2.10(2)                       | 3.100(4)                      | 174(3)                    | x,3/2-y,-1/2+z                |
|                        | N(1)-H(1B)...N(2)      | 1.00(2)                     | 2.145(2)                      | 3.136(4)                      | 171(3)                    | 1-x,-1/2+y,1/2-z              |
|                        | N(1')-H(1C)...N(2')    | 0.991(12)                   | 2.085(11)                     | 3.072(4)                      | 174.0(19)                 | 2-x,-1/2+y,1/2-z              |
|                        | N(1')-H(1D)...N(2)     | 1.00(2)                     | 2.11(2)                       | 3.111(4)                      | 174(2)                    | 1+x,3/2-y,-1/2+z              |
| <b>B</b>               | N(1)-H(1)...N(2)       | 0.90(3)                     | 2.21(3)                       | 3.081(4)                      | 161(3)                    | x,1/2-y,-1/2+z                |
|                        | N(1)-H(2)...F(2)       | 0.90(3)                     | 2.38(3)                       | 3.226(3)                      | 157(3)                    | -x,2-y,-z                     |
| <b>C</b>               | N(1)-H(1)...F(2)       | 0.89(3)                     | 2.53(4)                       | 3.218(4)                      | 134(3)                    | -x,1/2+y,-z                   |
|                        | N(1)-H(2)...N(2)       | 0.88(3)                     | 2.39(4)                       | 3.143(4)                      | 144(3)                    | -1+x,1+y,z                    |
|                        | C(6)-H(6)...N(2)       | 0.95                        | 2.61                          | 3.466(4)                      | 150                       | 2-x,1/2+y,1-z                 |
| <b>D</b>               | N(2)-H(1)...F(1)       | 0.86                        | 2.38                          | 3.088(9)                      | 140                       | x,-y,z                        |
|                        | N(2)-H(2)...N(2)       | 0.86                        | 2.50                          | 3.210(13)                     | 141                       | 1/2-x,-1/2+y,1-z              |
| <b>E</b>               | N(1)-H(1)...N(2)       | 0.87(2)                     | 2.29(2)                       | 3.152(2)                      | 169(2)                    | -x,1-y,-z                     |

<sup>a</sup> Hydrogen bonds of the minor parts of amines are not shown.

<sup>b</sup> N(1) belongs to the amine molecule (1), N(3) – to the amine molecule (2).

<sup>c</sup> Data from *CrystEngComm*, 2018, **20**, 807–817.

<sup>d</sup> Data from *ChemPhysChem*, 2005, **6**, 2307–2323.

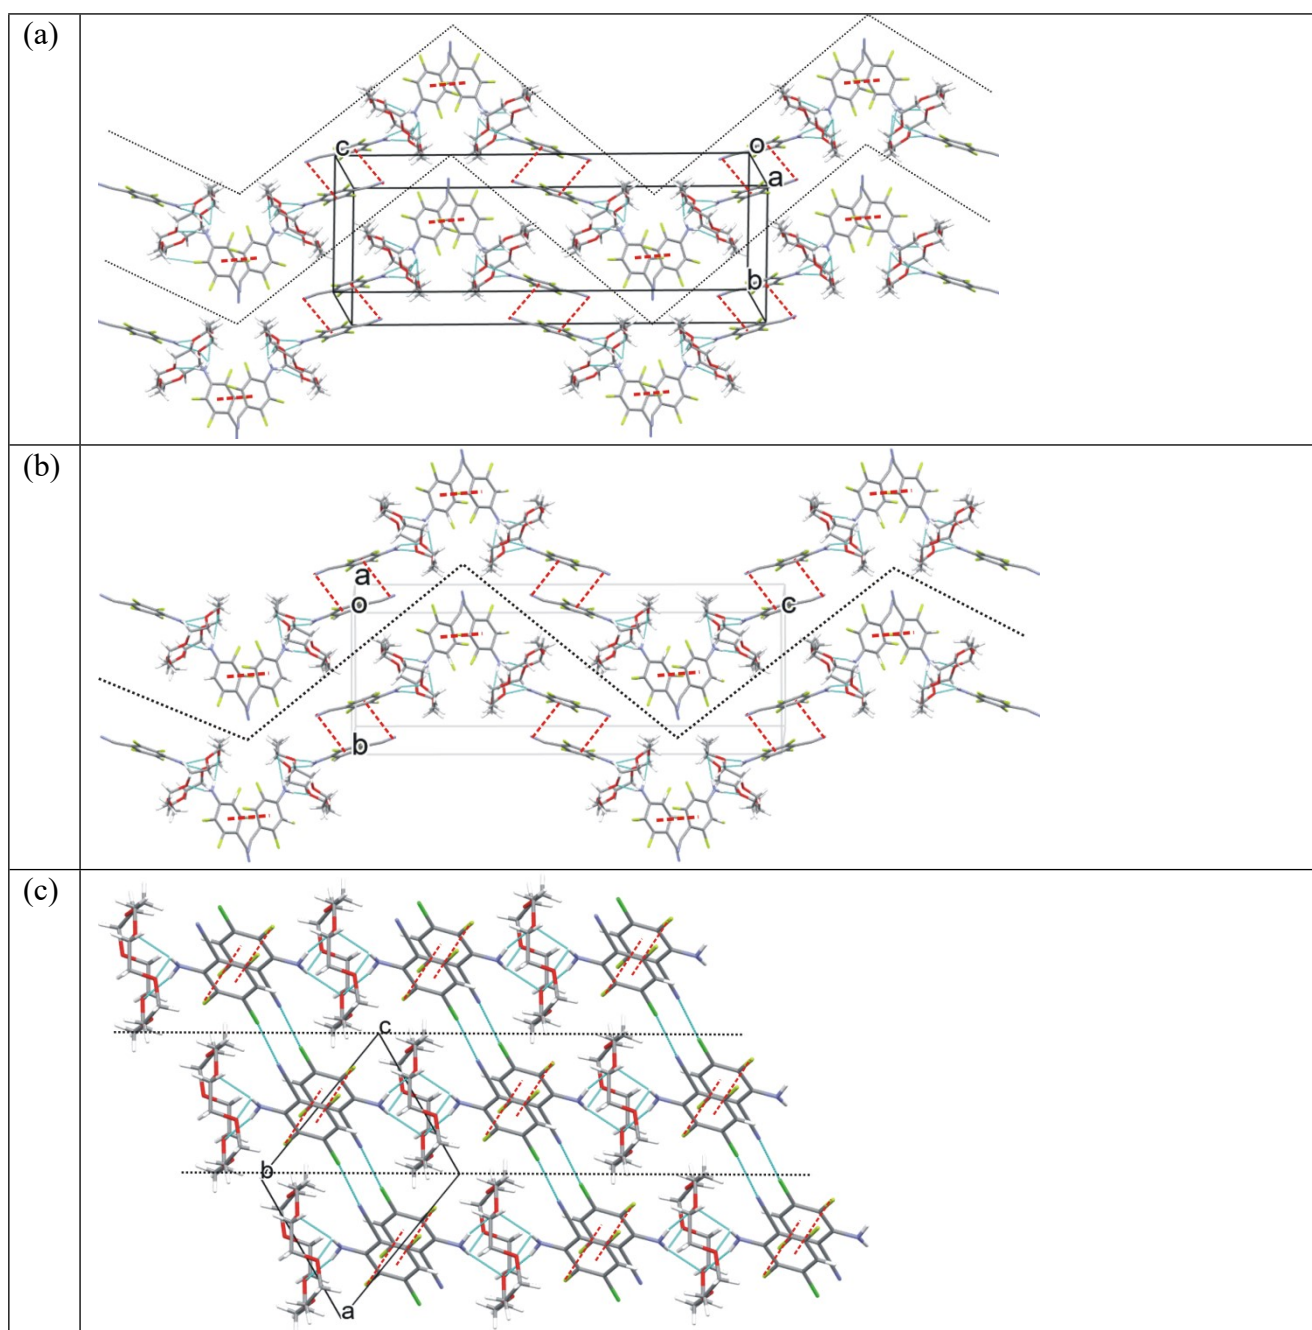

**Fig. S1.** Crystal packing in the associates  $A_2 \cdot cr$  (a, without disorder),  $B_2 \cdot cr$  (b, without disorder) and  $E_2 \cdot cr$  (c); top view of the layers. H-bonded/ $\pi$ -stacked rods are separated by dotted lines.

## Crystals

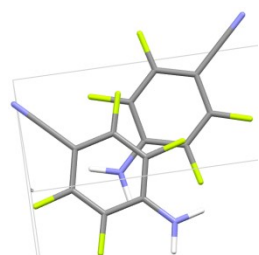

**A** (C–F $\cdots\pi_F$ )  
anti-parallel rotated  
geometry

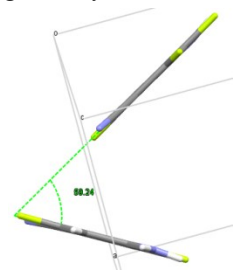

**B** (C $\equiv$ N $\cdots\pi_F$ ) T-shaped edge-to-face geometry

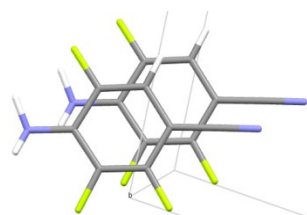

**C** (C–F $\cdots\pi_F$  +  $\pi_F\cdots\pi_F$ )  
parallel displaced geometry

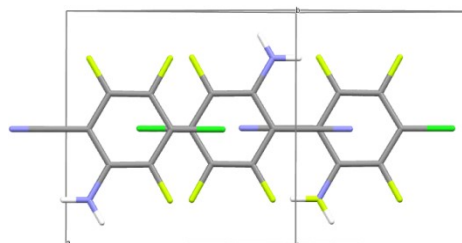

**D** (C–Cl $\cdots\pi_F$ )<sub>2</sub> + (C $\equiv$ N $\cdots\pi_F$ )<sub>2</sub>  
anti-parallel slipped geometry

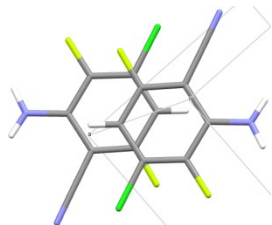

**E** ( $\pi_F\cdots\pi_F$  + C–F $\cdots\pi_F$ )  
anti-parallel displaced geometry

## Co-crystals

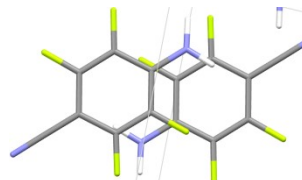

**A** (C–F $\cdots\pi_F$ )<sub>2</sub>  
anti-parallel displaced  
geometry

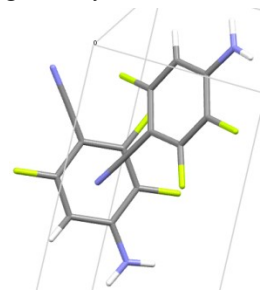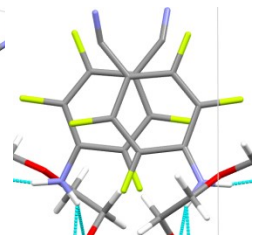

**A**<sub>2</sub>·**cr** ( $\pi_F\cdots\pi_F$ )  
parallel rotated geometry

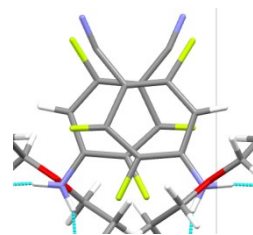

**B**<sub>2</sub>·**cr** ( $\pi_F\cdots\pi_F$ )  
parallel rotated geometry

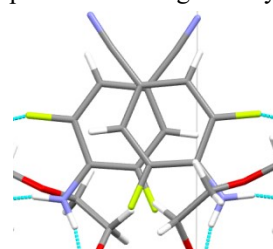

**C**<sub>2</sub>·**cr** ( $\pi_F\cdots\pi_F$ )  
parallel rotated geometry

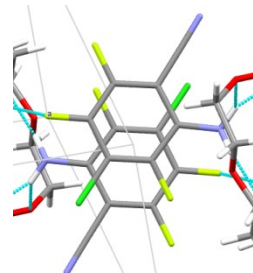

**D**<sub>2</sub>·**cr** (C–F $\cdots\pi_F$  +  $\pi_F\cdots\pi_F$ )  
anti-parallel displaced geometry

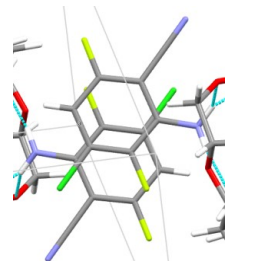

**E**<sub>2</sub>·**cr** (C–F $\cdots\pi_F$ )  
anti-parallel displaced geometry

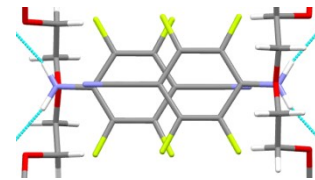

**A**<sub>2</sub>·**cr** (C $\equiv$ N $\cdots\pi_F$ )  
anti-parallel slipped geometry

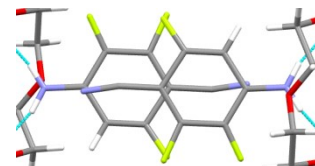

**B**<sub>2</sub>·**cr** (C $\equiv$ N $\cdots\pi_F$ )  
anti-parallel slipped geometry

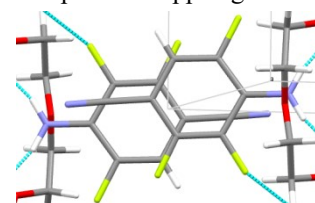

**C**<sub>2</sub>·**cr** (C–F $\cdots\pi_F$ )  
anti-parallel displaced geometry

**Fig. S2** Overlap of stacked molecules in the crystals; intermolecular interactions are shown in brackets.



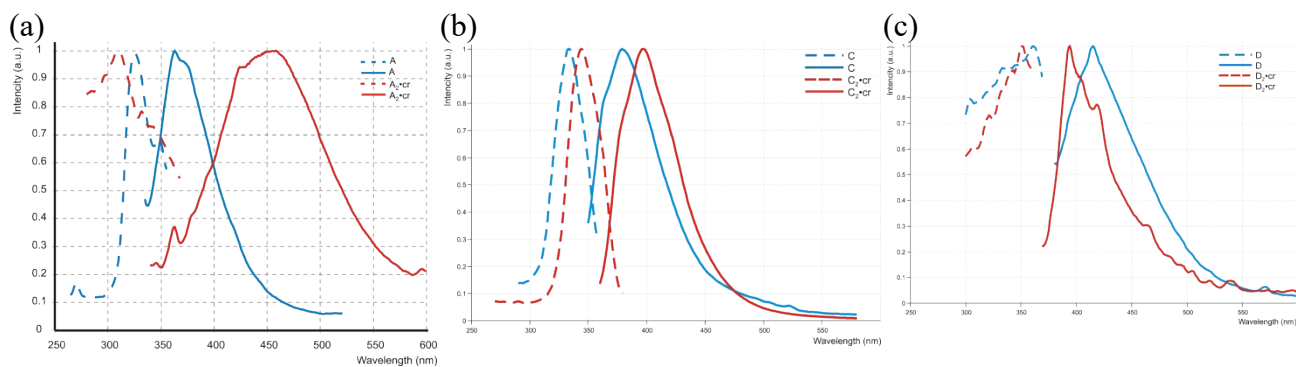

**Fig. S3** Absorption (dashed lines) and fluorescence (solid lines) spectra of aminobenzonitriles (blue lines) and their co-crystals with 18-crown-6 (red lines): a) **A** and **A<sub>2</sub>·cr**, b) **C** and **C<sub>2</sub>·cr**, c) **D** and **D<sub>2</sub>·cr**.

**Table S3** Modulus of the Electric Dipole Moments ( $\mu$ , in Debye) of molecules in isolated phase (is), crystal (hc) and co-crystal (cc) in the relaxed ground state ( $S_{0r}$ ), vertically excited electronic state ( $S_{1v}$ ), relaxed excited electronic state ( $S_{1r}$ ) and vertically de-excited electronic state ( $S_{0v}$ ).

| Molecule | Phase | $\mu(S_{0r})$ | $\mu(S_{1v})$ | $\mu(S_{1r})$ | $\mu(S_{0v})$ |
|----------|-------|---------------|---------------|---------------|---------------|
| <b>A</b> | (is)  | 6.7           | 3.8           | 4.3           | 6.4           |
|          | (hc)  | 3.1           | 1.4           | 2.2           | 2.9           |
|          | (cc)  | 4.7           | 1.1           | 1.3           | 4.6           |
| <b>B</b> | (is)  | 7.7           | 3.5           | 4.7           | 7.3           |
|          | (hc)  | 4.1           | 1.2           | 1.7           | 3.6           |
|          | (cc)  | 4.8           | 0.8           | 1.2           | 4.6           |
| <b>C</b> | (is)  | 6.0           | 3.4           | 3.5           | 5.8           |
|          | (hc)  | 3.2           | 1.8           | 2.0           | 3.1           |
|          | (cc)  | 3.3           | 1.6           | 2.4           | 3.1           |
| <b>D</b> | (is)  | 3.5           | 4.7           | 8.4           | 3.3           |
|          | (hc)  | 2.4           | 4.3           | 5.8           | 2.0           |
|          | (cc)  | 2.6           | 4.4           | 5.8           | 2.2           |
| <b>E</b> | (is)  | 2.8           | 4.2           | 8.0           | 2.3           |
|          | (hc)  | 1.9           | 3.7           | 5.7           | 1.5           |
|          | (cc)  | 2.1           | 3.6           | 3.6           | 1.1           |

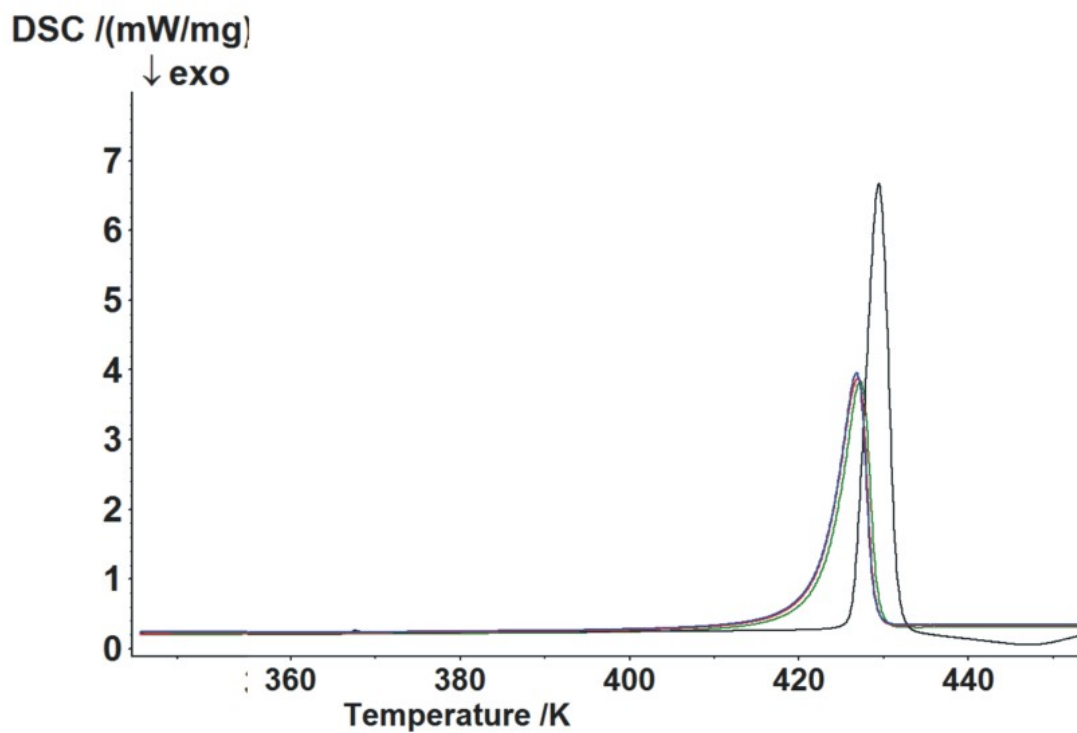

Fig. S4 DSC curves of the **A<sub>2</sub>·cr** co-crystal, the first (black) and subsequent (red, green) heating runs.

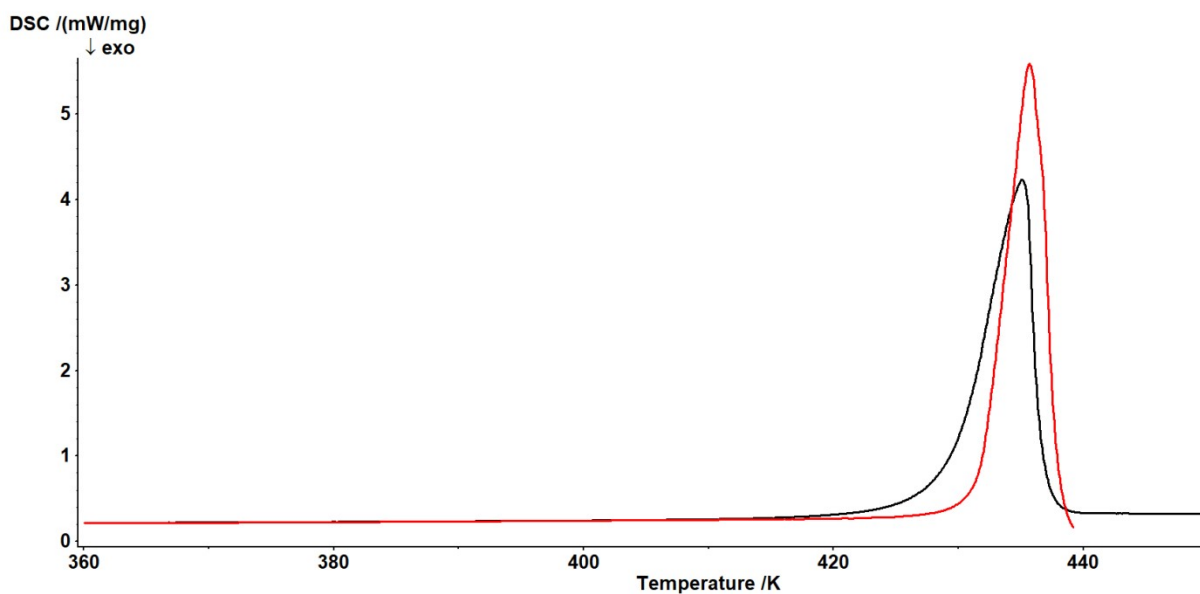

Fig. S5 DSC curves of the **B<sub>2</sub>·cr** co-crystal, the first (red) and subsequent (black) heating runs.

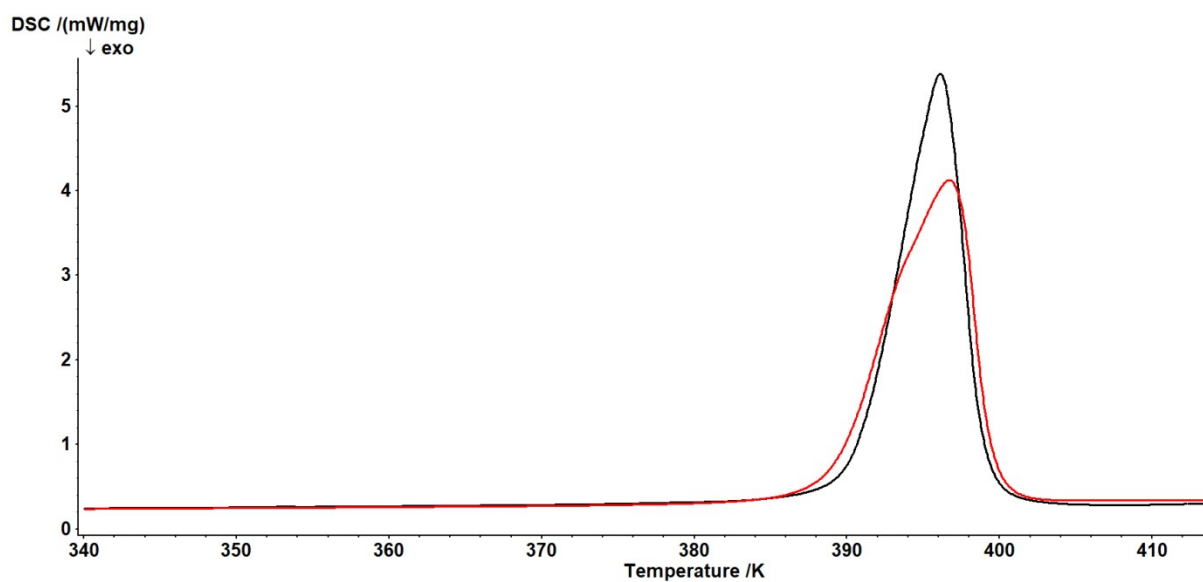

**Fig. S6** DSC curves of the  $E_2 \cdot cr$  co-crystal, the first (black) and subsequent (red) heating runs.

## Computational Results

### Optimised Geometries

molA\_apfd

|   |           |           |           |
|---|-----------|-----------|-----------|
| 6 | -0.002241 | 1.220370  | -0.000000 |
| 6 | -0.000810 | 0.496289  | 1.198091  |
| 6 | -0.002353 | -0.883420 | 1.194195  |
| 6 | -0.006128 | -1.613787 | 0.000000  |
| 6 | -0.002353 | -0.883420 | -1.194195 |
| 6 | -0.000810 | 0.496289  | -1.198091 |
| 9 | 0.003702  | 1.139487  | 2.357759  |
| 9 | 0.005392  | -1.563009 | -2.349691 |
| 6 | -0.001526 | 2.637314  | -0.000000 |
| 7 | -0.000474 | 3.792366  | -0.000000 |
| 9 | 0.005392  | -1.563009 | 2.349691  |
| 9 | 0.003702  | 1.139487  | -2.357759 |
| 7 | -0.051693 | -2.972613 | 0.000000  |
| 1 | 0.147475  | -3.459002 | 0.857966  |
| 1 | 0.147475  | -3.459002 | -0.857966 |

molA\_b3lypd

|   |           |           |           |
|---|-----------|-----------|-----------|
| 6 | -1.225628 | 0.000002  | 0.002241  |
| 6 | -0.496045 | 1.197501  | 0.000830  |
| 6 | 0.883429  | 1.193636  | 0.002173  |
| 6 | 1.617896  | -0.000001 | 0.006449  |
| 6 | 0.883426  | -1.193638 | 0.002173  |
| 6 | -0.496047 | -1.197500 | 0.000830  |
| 9 | -1.141919 | 2.364022  | -0.003925 |
| 9 | 1.567000  | -2.355543 | -0.005991 |
| 6 | -2.644206 | 0.000002  | 0.001773  |
| 7 | -3.799120 | -0.000000 | 0.000894  |
| 9 | 1.567004  | 2.355541  | -0.005990 |
| 9 | -1.141924 | -2.364019 | -0.003925 |
| 7 | 2.981588  | -0.000003 | 0.052541  |
| 1 | 3.467161  | 0.859243  | -0.147186 |
| 1 | 3.467158  | -0.859251 | -0.147185 |

molA\_blyp

|   |           |           |           |
|---|-----------|-----------|-----------|
| 6 | -0.003393 | 1.241276  | -0.000000 |
| 6 | -0.000978 | 0.500434  | -1.206478 |
| 6 | -0.000978 | -0.890369 | -1.201994 |
| 6 | -0.005238 | -1.634093 | 0.000000  |
| 6 | -0.000978 | -0.890369 | 1.201994  |
| 6 | -0.000978 | 0.500434  | 1.206478  |
| 9 | 0.004005  | 1.152695  | -2.390825 |
| 9 | 0.009060  | -1.581966 | 2.381053  |
| 6 | -0.005214 | 2.665111  | -0.000000 |
| 7 | -0.006104 | 3.833370  | -0.000000 |
| 9 | 0.009060  | -1.581966 | -2.381053 |
| 9 | 0.004005  | 1.152695  | 2.390825  |
| 7 | -0.057812 | -3.009788 | 0.000000  |
| 1 | 0.159391  | -3.496376 | -0.863789 |

|   |          |           |          |
|---|----------|-----------|----------|
| 1 | 0.159391 | -3.496376 | 0.863789 |
|---|----------|-----------|----------|

molA\_camb3lypd

|   |           |           |           |
|---|-----------|-----------|-----------|
| 6 | -0.001781 | 1.218903  | 0.000000  |
| 6 | -0.000825 | 0.493894  | 1.191622  |
| 6 | -0.002149 | -0.880460 | 1.188358  |
| 6 | -0.005660 | -1.611672 | -0.000000 |
| 6 | -0.002149 | -0.880460 | -1.188358 |
| 6 | -0.000825 | 0.493894  | -1.191622 |
| 9 | 0.002823  | 1.135703  | 2.353050  |
| 9 | 0.004232  | -1.560514 | -2.345180 |
| 6 | -0.000881 | 2.639894  | 0.000000  |
| 7 | 0.000231  | 3.787983  | 0.000000  |
| 9 | 0.004232  | -1.560514 | 2.345180  |
| 9 | 0.002823  | 1.135703  | -2.353050 |
| 7 | -0.040829 | -2.969861 | -0.000000 |
| 1 | 0.119585  | -3.462218 | 0.862245  |
| 1 | 0.119585  | -3.462218 | -0.862246 |

molA\_m062x

|   |           |           |           |
|---|-----------|-----------|-----------|
| 6 | -1.216326 | 0.000001  | 0.002351  |
| 6 | -0.493551 | 1.194856  | 0.001892  |
| 6 | 0.883780  | 1.191445  | 0.005665  |
| 6 | 1.613743  | -0.000002 | 0.009755  |
| 6 | 0.883778  | -1.191447 | 0.005665  |
| 6 | -0.493553 | -1.194855 | 0.001892  |
| 9 | -1.134860 | 2.352906  | -0.003513 |
| 9 | 1.562470  | -2.343846 | -0.001489 |
| 6 | -2.641505 | 0.000002  | -0.001365 |
| 7 | -3.791101 | 0.000003  | -0.004820 |
| 9 | 1.562474  | 2.343843  | -0.001489 |
| 9 | -1.134864 | -2.352904 | -0.003513 |
| 7 | 2.976241  | -0.000003 | 0.060481  |
| 1 | 3.456524  | 0.858254  | -0.157906 |
| 1 | 3.456523  | -0.858260 | -0.157906 |

molA\_mp2

|   |           |           |           |
|---|-----------|-----------|-----------|
| 6 | -1.219605 | -0.000037 | 0.028708  |
| 6 | -0.495667 | 1.200610  | -0.001165 |
| 6 | 0.891347  | 1.194814  | 0.039345  |
| 6 | 1.623583  | 0.000013  | 0.012227  |
| 6 | 0.891427  | -1.194821 | 0.039099  |
| 6 | -0.495783 | -1.200685 | -0.001073 |
| 9 | -1.142688 | 2.367094  | -0.006717 |
| 9 | 1.568720  | -2.352853 | 0.022325  |
| 6 | -2.645411 | -0.000217 | -0.013212 |
| 7 | -3.822807 | -0.000438 | -0.044048 |
| 9 | 1.568637  | 2.352899  | 0.022577  |
| 9 | -1.142515 | -2.367257 | -0.006884 |
| 7 | 3.002328  | 0.000277  | 0.099516  |
| 1 | 3.453923  | 0.847123  | -0.217705 |
| 1 | 3.454285  | -0.846529 | -0.217291 |

|            |           |           |           |
|------------|-----------|-----------|-----------|
| molA_pbe0d |           |           |           |
| 6          | -0.003717 | 1.219879  | 0.000000  |
| 6          | -0.001449 | 0.494968  | -1.195749 |
| 6          | -0.001702 | -0.882044 | -1.191800 |
| 6          | -0.004838 | -1.612753 | -0.000000 |
| 6          | -0.001702 | -0.882044 | 1.191800  |
| 6          | -0.001449 | 0.494968  | 1.195749  |
| 9          | 0.002644  | 1.136352  | -2.352884 |
| 9          | 0.007355  | -1.560781 | 2.344073  |
| 6          | -0.004383 | 2.635891  | 0.000000  |
| 7          | -0.004452 | 3.790102  | 0.000000  |
| 9          | 0.007355  | -1.560781 | -2.344073 |
| 9          | 0.002644  | 1.136352  | 2.352884  |
| 7          | -0.050222 | -2.971068 | -0.000000 |
| 1          | 0.157305  | -3.453462 | -0.857946 |
| 1          | 0.157305  | -3.453462 | 0.857946  |

|          |           |           |           |
|----------|-----------|-----------|-----------|
| molA_pbe |           |           |           |
| 6        | -0.003901 | 1.234710  | -0.000000 |
| 6        | -0.001183 | 0.499477  | -1.204864 |
| 6        | -0.001183 | -0.888635 | -1.200188 |
| 6        | -0.005165 | -1.627710 | 0.000000  |
| 6        | -0.001183 | -0.888635 | 1.200188  |
| 6        | -0.001183 | 0.499477  | 1.204864  |
| 9        | 0.003768  | 1.147835  | -2.378920 |
| 9        | 0.009370  | -1.576342 | 2.368383  |
| 6        | -0.005869 | 2.653326  | -0.000000 |
| 7        | -0.006877 | 3.822416  | -0.000000 |
| 9        | 0.009370  | -1.576342 | -2.368383 |
| 9        | 0.003768  | 1.147835  | 2.378920  |
| 7        | -0.056770 | -2.996352 | 0.000000  |
| 1        | 0.163504  | -3.480692 | -0.864112 |
| 1        | 0.163504  | -3.480692 | 0.864112  |

|            |           |           |           |
|------------|-----------|-----------|-----------|
| molA_rtpss |           |           |           |
| 6          | -0.005614 | 1.233295  | 0.000000  |
| 6          | -0.001569 | 0.497975  | -1.201692 |
| 6          | -0.001569 | -0.887092 | -1.196543 |
| 6          | -0.004352 | -1.624822 | -0.000000 |
| 6          | -0.001569 | -0.887092 | 1.196543  |
| 6          | -0.001569 | 0.497975  | 1.201692  |
| 9          | 0.004423  | 1.146694  | -2.376549 |
| 9          | 0.012182  | -1.575354 | 2.365522  |
| 6          | -0.007807 | 2.652316  | 0.000000  |
| 7          | -0.008948 | 3.819220  | 0.000000  |
| 9          | 0.012182  | -1.575354 | -2.365522 |
| 9          | 0.004423  | 1.146694  | 2.376549  |
| 7          | -0.072393 | -2.998090 | -0.000000 |
| 1          | 0.207397  | -3.463676 | -0.857223 |
| 1          | 0.207397  | -3.463676 | 0.857223  |

molA\_wb97xd

|   |           |           |           |
|---|-----------|-----------|-----------|
| 6 | -0.002274 | 1.218789  | -0.000000 |
| 6 | -0.000835 | 0.494865  | 1.194704  |
| 6 | -0.002594 | -0.882889 | 1.191183  |
| 6 | -0.005862 | -1.613927 | 0.000000  |
| 6 | -0.002594 | -0.882889 | -1.191183 |
| 6 | -0.000835 | 0.494865  | -1.194704 |
| 9 | 0.003255  | 1.136885  | 2.352886  |
| 9 | 0.005109  | -1.560331 | -2.346339 |
| 6 | -0.001057 | 2.641620  | -0.000000 |
| 7 | 0.000359  | 3.792608  | -0.000000 |
| 9 | 0.005109  | -1.560331 | 2.346339  |
| 9 | 0.003255  | 1.136885  | -2.352886 |
| 7 | -0.052054 | -2.975642 | 0.000000  |
| 1 | 0.151950  | -3.459854 | 0.857367  |
| 1 | 0.151950  | -3.459854 | -0.857367 |

molA\_x3lyp

|   |           |           |           |
|---|-----------|-----------|-----------|
| 6 | -0.003064 | 1.226476  | 0.000000  |
| 6 | -0.001175 | 0.495887  | -1.196634 |
| 6 | -0.001315 | -0.883351 | -1.192789 |
| 6 | -0.004827 | -1.618636 | -0.000000 |
| 6 | -0.001315 | -0.883351 | 1.192789  |
| 6 | -0.001175 | 0.495887  | 1.196634  |
| 9 | 0.002796  | 1.139500  | -2.363194 |
| 9 | 0.006854  | -1.565337 | 2.354399  |
| 6 | -0.003732 | 2.646164  | 0.000000  |
| 7 | -0.003816 | 3.800423  | 0.000000  |
| 9 | 0.006854  | -1.565337 | -2.354399 |
| 9 | 0.002796  | 1.139500  | 2.363194  |
| 7 | -0.048240 | -2.981876 | -0.000000 |
| 1 | 0.143705  | -3.469687 | -0.859552 |
| 1 | 0.143705  | -3.469687 | 0.859552  |

molB\_apfd

|   |           |           |           |
|---|-----------|-----------|-----------|
| 6 | 1.098969  | -0.042821 | 0.001367  |
| 6 | 0.670232  | 1.289019  | -0.000307 |
| 6 | -0.659615 | 1.647905  | 0.001375  |
| 6 | -1.647546 | 0.653485  | 0.004414  |
| 6 | -1.235479 | -0.686284 | 0.003719  |
| 6 | 0.100435  | -1.025759 | 0.002429  |
| 9 | 1.595862  | 2.249023  | -0.003096 |
| 9 | -2.173027 | -1.648285 | -0.003116 |
| 6 | 2.472356  | -0.390397 | -0.000438 |
| 7 | 3.592439  | -0.673378 | -0.002372 |
| 9 | 0.439984  | -2.307605 | -0.001620 |
| 7 | -2.979290 | 0.943531  | 0.047427  |
| 1 | -3.280110 | 1.874508  | -0.184132 |
| 1 | -3.636662 | 0.205020  | -0.141095 |
| 1 | -0.925020 | 2.698675  | 0.006571  |

molB\_b3lypd

|   |          |           |           |
|---|----------|-----------|-----------|
| 6 | 1.103381 | -0.043672 | 0.001449  |
| 6 | 0.669168 | 1.288448  | -0.000317 |

|   |           |           |           |
|---|-----------|-----------|-----------|
| 6 | -0.660273 | 1.650090  | 0.001527  |
| 6 | -1.650903 | 0.654708  | 0.004737  |
| 6 | -1.234884 | -0.685050 | 0.003752  |
| 6 | 0.100547  | -1.025419 | 0.002524  |
| 9 | 1.598291  | 2.256040  | -0.003267 |
| 9 | -2.178937 | -1.651552 | -0.003892 |
| 6 | 2.478651  | -0.390527 | -0.000332 |
| 7 | 3.598772  | -0.672767 | -0.002284 |
| 9 | 0.441112  | -2.314523 | -0.001929 |
| 7 | -2.987773 | 0.946608  | 0.049169  |
| 1 | -3.287177 | 1.876940  | -0.190889 |
| 1 | -3.643139 | 0.205893  | -0.142449 |
| 1 | -0.924984 | 2.699132  | 0.006898  |

molB\_blyp

|   |           |           |           |
|---|-----------|-----------|-----------|
| 6 | 1.115746  | -0.045595 | 0.000773  |
| 6 | 0.672694  | 1.297914  | -0.005140 |
| 6 | -0.665878 | 1.664247  | -0.020117 |
| 6 | -1.667391 | 0.663490  | -0.029510 |
| 6 | -1.246882 | -0.686923 | -0.020620 |
| 6 | 0.099140  | -1.032160 | -0.006338 |
| 9 | 1.613482  | 2.281669  | 0.003744  |
| 9 | -2.203811 | -1.667307 | -0.017437 |
| 6 | 2.495766  | -0.394849 | 0.015630  |
| 7 | 3.628527  | -0.681105 | 0.028359  |
| 9 | 0.439999  | -2.340621 | 0.006013  |
| 7 | -3.014918 | 0.961533  | -0.094375 |
| 1 | -3.315129 | 1.897177  | 0.157816  |
| 1 | -3.676643 | 0.218216  | 0.107332  |
| 1 | -0.929868 | 2.720468  | -0.031244 |

molB\_camb3lypd

|   |           |           |           |
|---|-----------|-----------|-----------|
| 6 | 1.097090  | -0.042277 | 0.001067  |
| 6 | 0.665678  | 1.282868  | -0.000056 |
| 6 | -0.659239 | 1.644388  | 0.001887  |
| 6 | -1.644905 | 0.652166  | 0.004644  |
| 6 | -1.229668 | -0.681897 | 0.003534  |
| 6 | 0.100547  | -1.020186 | 0.002142  |
| 9 | 1.590541  | 2.245319  | -0.002282 |
| 9 | -2.169296 | -1.644150 | -0.002716 |
| 6 | 2.474864  | -0.388789 | -0.000776 |
| 7 | 3.588489  | -0.668971 | -0.002703 |
| 9 | 0.439064  | -2.303066 | -0.001450 |
| 7 | -2.977507 | 0.937516  | 0.039388  |
| 1 | -3.287418 | 1.872307  | -0.160897 |
| 1 | -3.636390 | 0.193805  | -0.119499 |
| 1 | -0.922039 | 2.693505  | 0.006991  |

molB\_m062x

|   |           |           |          |
|---|-----------|-----------|----------|
| 6 | 1.094595  | -0.041614 | 0.001308 |
| 6 | 0.667803  | 1.286993  | 0.000563 |
| 6 | -0.660117 | 1.650659  | 0.003896 |
| 6 | -1.646722 | 0.656231  | 0.006959 |



|   |           |           |           |
|---|-----------|-----------|-----------|
| 6 | -1.234621 | -0.681170 | 0.006036  |
| 6 | 0.098033  | -1.021783 | 0.003033  |
| 9 | 1.593808  | 2.242807  | -0.002590 |
| 9 | -2.172418 | -1.638702 | -0.000573 |
| 6 | 2.475932  | -0.391201 | -0.002603 |
| 7 | 3.590688  | -0.673054 | -0.006264 |
| 9 | 0.435190  | -2.301648 | -0.001768 |
| 7 | -2.983203 | 0.941282  | 0.053501  |
| 1 | -3.283256 | 1.868433  | -0.197660 |
| 1 | -3.631276 | 0.196723  | -0.149363 |
| 1 | -0.922584 | 2.700393  | 0.010221  |

molB\_mp2

|   |           |           |           |
|---|-----------|-----------|-----------|
| 6 | 1.098539  | -0.042306 | 0.030965  |
| 6 | 0.670869  | 1.292179  | 0.002519  |
| 6 | -0.667200 | 1.650690  | 0.038063  |
| 6 | -1.657518 | 0.655150  | 0.011377  |
| 6 | -1.243529 | -0.684579 | 0.041364  |
| 6 | 0.100145  | -1.027038 | 0.002027  |
| 9 | 1.601314  | 2.258174  | -0.000661 |
| 9 | -2.178144 | -1.650372 | 0.023173  |
| 6 | 2.480564  | -0.391701 | -0.017725 |
| 7 | 3.621676  | -0.680610 | -0.053129 |
| 9 | 0.441254  | -2.316390 | -0.006798 |
| 7 | -3.008115 | 0.955367  | 0.092074  |
| 1 | -3.272098 | 1.858608  | -0.275493 |
| 1 | -3.631924 | 0.214376  | -0.197688 |
| 1 | -0.933983 | 2.702801  | 0.034630  |

molB\_pbe0d

|   |           |           |           |
|---|-----------|-----------|-----------|
| 6 | 1.098809  | -0.042197 | 0.001446  |
| 6 | 0.667374  | 1.286912  | -0.000193 |
| 6 | -0.660391 | 1.645349  | 0.001720  |
| 6 | -1.647004 | 0.651388  | 0.004808  |
| 6 | -1.232292 | -0.685502 | 0.004000  |
| 6 | 0.101063  | -1.023784 | 0.002506  |
| 9 | 1.588782  | 2.246217  | -0.003017 |
| 9 | -2.168117 | -1.644786 | -0.003529 |
| 6 | 2.471728  | -0.387673 | -0.000540 |
| 7 | 3.591360  | -0.669003 | -0.002631 |
| 9 | 0.440426  | -2.302338 | -0.001937 |
| 7 | -2.978570 | 0.938132  | 0.048722  |
| 1 | -3.279753 | 1.866295  | -0.191909 |
| 1 | -3.629631 | 0.195486  | -0.144044 |
| 1 | -0.925689 | 2.695515  | 0.007173  |

molB\_pbe

|   |           |           |           |
|---|-----------|-----------|-----------|
| 6 | 1.112205  | -0.044898 | 0.001670  |
| 6 | 0.672992  | 1.295628  | -0.000807 |
| 6 | -0.663519 | 1.658755  | 0.000747  |
| 6 | -1.660553 | 0.659934  | 0.004348  |
| 6 | -1.242316 | -0.687553 | 0.003758  |
| 6 | 0.101309  | -1.031265 | 0.002643  |

|   |           |           |           |
|---|-----------|-----------|-----------|
| 9 | 1.607118  | 2.269217  | -0.004245 |
| 9 | -2.191668 | -1.659142 | -0.005041 |
| 6 | 2.487299  | -0.392498 | 0.000417  |
| 7 | 3.621042  | -0.678522 | -0.001136 |
| 9 | 0.441331  | -2.328612 | -0.002450 |
| 7 | -3.001871 | 0.951643  | 0.054230  |
| 1 | -3.303194 | 1.885780  | -0.200149 |
| 1 | -3.657815 | 0.203764  | -0.148437 |
| 1 | -0.928723 | 2.716819  | 0.005889  |

molB\_rtpss

|   |           |           |           |
|---|-----------|-----------|-----------|
| 6 | 1.110345  | -0.045330 | 0.002413  |
| 6 | 0.670393  | 1.292006  | -0.001066 |
| 6 | -0.663312 | 1.659422  | 0.000601  |
| 6 | -1.656588 | 0.659863  | 0.003833  |
| 6 | -1.239420 | -0.683698 | 0.004464  |
| 6 | 0.100567  | -1.028588 | 0.003237  |
| 9 | 1.607468  | 2.264718  | -0.005379 |
| 9 | -2.190652 | -1.655073 | -0.006688 |
| 6 | 2.486037  | -0.392333 | 0.000844  |
| 7 | 3.617727  | -0.677581 | -0.001012 |
| 9 | 0.439874  | -2.327007 | -0.002966 |
| 7 | -3.003449 | 0.950101  | 0.069238  |
| 1 | -3.292093 | 1.868097  | -0.250495 |
| 1 | -3.637914 | 0.198849  | -0.183304 |
| 1 | -0.928280 | 2.713611  | 0.005552  |

molB\_wb97xd

|   |           |           |           |
|---|-----------|-----------|-----------|
| 6 | 1.097465  | -0.040721 | 0.001252  |
| 6 | 0.665383  | 1.286656  | -0.000100 |
| 6 | -0.663396 | 1.644134  | 0.002036  |
| 6 | -1.648093 | 0.648776  | 0.004756  |
| 6 | -1.232104 | -0.687370 | 0.003925  |
| 6 | 0.102460  | -1.023491 | 0.002350  |
| 9 | 1.585675  | 2.249193  | -0.002533 |
| 9 | -2.166789 | -1.650462 | -0.003133 |
| 6 | 2.477477  | -0.385839 | -0.000911 |
| 7 | 3.594398  | -0.664815 | -0.003142 |
| 9 | 0.444518  | -2.302575 | -0.001500 |
| 7 | -2.982611 | 0.939100  | 0.047820  |
| 1 | -3.280197 | 1.868662  | -0.191017 |
| 1 | -3.637361 | 0.200162  | -0.145114 |
| 1 | -0.930739 | 2.692896  | 0.008042  |

molB\_x3llyp

|   |           |           |           |
|---|-----------|-----------|-----------|
| 6 | 1.104333  | -0.043364 | 0.001342  |
| 6 | 0.668351  | 1.287980  | -0.000342 |
| 6 | -0.661153 | 1.649157  | 0.001390  |
| 6 | -1.651912 | 0.654027  | 0.004423  |
| 6 | -1.234117 | -0.684918 | 0.003497  |
| 6 | 0.101226  | -1.024556 | 0.002374  |
| 9 | 1.595156  | 2.256245  | -0.003087 |
| 9 | -2.176122 | -1.651947 | -0.003702 |

|   |           |           |           |
|---|-----------|-----------|-----------|
| 6 | 2.480856  | -0.389799 | -0.000325 |
| 7 | 3.600482  | -0.671337 | -0.002150 |
| 9 | 0.440247  | -2.312949 | -0.001826 |
| 7 | -2.988638 | 0.944141  | 0.047508  |
| 1 | -3.291725 | 1.875299  | -0.183704 |
| 1 | -3.645358 | 0.203085  | -0.137074 |
| 1 | -0.924857 | 2.698687  | 0.006659  |

molC\_apfd

|   |           |           |           |
|---|-----------|-----------|-----------|
| 6 | 1.264071  | -0.448127 | 0.001608  |
| 6 | 0.355901  | -1.516953 | -0.000132 |
| 6 | -0.991944 | -1.259553 | 0.001507  |
| 6 | -1.523999 | 0.038220  | 0.006255  |
| 6 | -0.598685 | 1.085142  | 0.002560  |
| 6 | 0.765546  | 0.855943  | 0.000958  |
| 9 | -1.066861 | 2.341194  | -0.004967 |
| 6 | 2.665567  | -0.678760 | 0.000586  |
| 7 | 3.802793  | -0.883358 | -0.000816 |
| 9 | 1.591002  | 1.896645  | -0.003371 |
| 7 | -2.865420 | 0.269953  | 0.056190  |
| 1 | -3.483447 | -0.493676 | -0.162054 |
| 1 | -3.196728 | 1.194775  | -0.162181 |
| 9 | -1.879463 | -2.274412 | -0.007204 |
| 1 | 0.710543  | -2.540206 | -0.003900 |

molC\_b3lypd

|   |           |           |           |
|---|-----------|-----------|-----------|
| 6 | 1.269803  | -0.446310 | 0.001690  |
| 6 | 0.359026  | -1.517555 | -0.000128 |
| 6 | -0.989091 | -1.259519 | 0.001404  |
| 6 | -1.527414 | 0.036833  | 0.006678  |
| 6 | -0.600574 | 1.084623  | 0.002512  |
| 6 | 0.763504  | 0.856907  | 0.001037  |
| 9 | -1.073795 | 2.346851  | -0.005465 |
| 6 | 2.672760  | -0.677351 | 0.000761  |
| 7 | 3.809267  | -0.885332 | -0.000585 |
| 9 | 1.591814  | 1.904976  | -0.003569 |
| 7 | -2.874370 | 0.266109  | 0.057252  |
| 1 | -3.489696 | -0.500605 | -0.161580 |
| 1 | -3.206960 | 1.191068  | -0.162328 |
| 9 | -1.878955 | -2.283217 | -0.007890 |
| 1 | 0.712710  | -2.539161 | -0.004166 |

molC\_blyp

|   |           |           |           |
|---|-----------|-----------|-----------|
| 6 | 1.285032  | -0.451037 | 0.001702  |
| 6 | 0.362758  | -1.529856 | -0.000614 |
| 6 | -0.995025 | -1.268120 | 0.000682  |
| 6 | -1.542644 | 0.037232  | 0.006421  |
| 6 | -0.605403 | 1.092246  | 0.001987  |
| 6 | 0.769624  | 0.863164  | 0.000863  |
| 9 | -1.084297 | 2.372676  | -0.006946 |
| 6 | 2.692866  | -0.684824 | 0.001609  |
| 7 | 3.842059  | -0.897326 | 0.000874  |
| 9 | 1.607275  | 1.927681  | -0.004204 |

|   |           |           |           |
|---|-----------|-----------|-----------|
| 7 | -2.900812 | 0.267475  | 0.063424  |
| 1 | -3.518744 | -0.504434 | -0.166116 |
| 1 | -3.235986 | 1.197563  | -0.166683 |
| 9 | -1.895664 | -2.309108 | -0.009738 |
| 1 | 0.716920  | -2.558246 | -0.005199 |

molC\_camb3lypd

|   |           |           |           |
|---|-----------|-----------|-----------|
| 6 | 1.262675  | -0.444884 | 0.001465  |
| 6 | 0.357290  | -1.511696 | 0.000127  |
| 6 | -0.985928 | -1.254332 | 0.001706  |
| 6 | -1.521397 | 0.036828  | 0.006317  |
| 6 | -0.599103 | 1.079353  | 0.002561  |
| 6 | 0.760183  | 0.851513  | 0.000980  |
| 9 | -1.068870 | 2.336134  | -0.004194 |
| 6 | 2.668678  | -0.673644 | 0.000218  |
| 7 | 3.798873  | -0.878172 | -0.001286 |
| 9 | 1.583844  | 1.895139  | -0.002868 |
| 7 | -2.863698 | 0.265080  | 0.048289  |
| 1 | -3.484468 | -0.503196 | -0.142742 |
| 1 | -3.201009 | 1.193215  | -0.143825 |
| 9 | -1.873200 | -2.271638 | -0.006219 |
| 1 | 0.708898  | -2.533924 | -0.003162 |

molC\_m062x

|   |           |           |           |
|---|-----------|-----------|-----------|
| 6 | 1.260165  | -0.447200 | 0.001486  |
| 6 | 0.355960  | -1.517589 | 0.000983  |
| 6 | -0.990432 | -1.258371 | 0.005181  |
| 6 | -1.523450 | 0.036588  | 0.010640  |
| 6 | -0.601213 | 1.081506  | 0.006320  |
| 6 | 0.761054  | 0.852277  | 0.002044  |
| 9 | -1.069133 | 2.334103  | -0.000366 |
| 6 | 2.671326  | -0.672085 | -0.002691 |
| 7 | 3.803964  | -0.871386 | -0.006671 |
| 9 | 1.583658  | 1.892431  | -0.003389 |
| 7 | -2.869720 | 0.266556  | 0.066513  |
| 1 | -3.478906 | -0.499240 | -0.174070 |
| 1 | -3.195373 | 1.189330  | -0.174100 |
| 9 | -1.878061 | -2.268316 | -0.002723 |
| 1 | 0.708189  | -2.540287 | -0.003532 |

molC\_mp2

|   |           |           |           |
|---|-----------|-----------|-----------|
| 6 | 1.265260  | -0.447217 | 0.021945  |
| 6 | 0.358417  | -1.523947 | -0.001924 |
| 6 | -0.998868 | -1.261046 | 0.029719  |
| 6 | -1.534237 | 0.037019  | 0.009270  |
| 6 | -0.607359 | 1.085420  | 0.034969  |
| 6 | 0.764778  | 0.858988  | -0.002321 |
| 9 | -1.074605 | 2.342946  | 0.022738  |
| 6 | 2.676294  | -0.675528 | -0.012787 |
| 7 | 3.835964  | -0.880027 | -0.040372 |
| 9 | 1.592603  | 1.907342  | -0.005451 |
| 7 | -2.894715 | 0.271128  | 0.100740  |
| 1 | -3.478816 | -0.487477 | -0.223652 |

|   |           |           |           |
|---|-----------|-----------|-----------|
| 1 | -3.196268 | 1.179840  | -0.223758 |
| 9 | -1.882554 | -2.280099 | 0.016425  |
| 1 | 0.712136  | -2.549024 | 0.000084  |

molC\_pbe0d

|   |           |           |           |
|---|-----------|-----------|-----------|
| 6 | 1.264277  | -0.444813 | 0.001735  |
| 6 | 0.357623  | -1.513755 | -0.000068 |
| 6 | -0.988262 | -1.257743 | 0.001771  |
| 6 | -1.523344 | 0.036572  | 0.006748  |
| 6 | -0.599993 | 1.082613  | 0.002883  |
| 6 | 0.761970  | 0.855843  | 0.001068  |
| 9 | -1.069532 | 2.334602  | -0.005161 |
| 6 | 2.665104  | -0.673639 | 0.000533  |
| 7 | 3.801439  | -0.878425 | -0.001027 |
| 9 | 1.583407  | 1.895843  | -0.003515 |
| 7 | -2.864808 | 0.265137  | 0.057903  |
| 1 | -3.477012 | -0.500781 | -0.167556 |
| 1 | -3.194681 | 1.188274  | -0.168466 |
| 9 | -1.871801 | -2.271391 | -0.007550 |
| 1 | 0.712366  | -2.536420 | -0.004095 |

molC\_pbe

|   |           |           |           |
|---|-----------|-----------|-----------|
| 6 | 1.278357  | -0.451184 | 0.001773  |
| 6 | 0.359949  | -1.526663 | -0.000561 |
| 6 | -0.994932 | -1.265768 | 0.001046  |
| 6 | -1.537289 | 0.037960  | 0.006802  |
| 6 | -0.603341 | 1.090537  | 0.002381  |
| 6 | 0.768960  | 0.861043  | 0.000919  |
| 9 | -1.078413 | 2.360152  | -0.006751 |
| 6 | 2.681413  | -0.682322 | 0.001455  |
| 7 | 3.832138  | -0.890748 | 0.000523  |
| 9 | 1.601193  | 1.915605  | -0.004239 |
| 7 | -2.887928 | 0.268337  | 0.062885  |
| 1 | -3.504729 | -0.503934 | -0.167833 |
| 1 | -3.220587 | 1.198781  | -0.168656 |
| 9 | -1.891483 | -2.293845 | -0.009560 |
| 1 | 0.715471  | -2.556808 | -0.005299 |

molC\_rtpss

|   |           |           |           |
|---|-----------|-----------|-----------|
| 6 | 1.275750  | -0.452156 | 0.002486  |
| 6 | 0.359563  | -1.527891 | -0.000765 |
| 6 | -0.992972 | -1.261549 | 0.001290  |
| 6 | -1.533823 | 0.038426  | 0.006531  |
| 6 | -0.601901 | 1.087358  | 0.002983  |
| 6 | 0.766938  | 0.857271  | 0.001105  |
| 9 | -1.076296 | 2.358238  | -0.008486 |
| 6 | 2.679816  | -0.681327 | 0.001994  |
| 7 | 3.828582  | -0.888559 | 0.000784  |
| 9 | 1.600838  | 1.911781  | -0.005119 |
| 7 | -2.889111 | 0.269526  | 0.079055  |
| 1 | -3.486580 | -0.499013 | -0.208300 |
| 1 | -3.204571 | 1.190171  | -0.209081 |
| 9 | -1.893319 | -2.288303 | -0.011831 |

|             |           |           |           |
|-------------|-----------|-----------|-----------|
| 1           | 0.713630  | -2.554185 | -0.006316 |
| molC_wb97xd |           |           |           |
| 6           | 1.263473  | -0.441516 | 0.001680  |
| 6           | 0.360408  | -1.511820 | 0.000008  |
| 6           | -0.986366 | -1.257891 | 0.001872  |
| 6           | -1.524183 | 0.035008  | 0.006155  |
| 6           | -0.603046 | 1.082015  | 0.002816  |
| 6           | 0.760355  | 0.856913  | 0.000932  |
| 9           | -1.073055 | 2.335732  | -0.004726 |
| 6           | 2.671309  | -0.671303 | 0.000274  |
| 7           | 3.804176  | -0.877373 | -0.001422 |
| 9           | 1.581353  | 1.899022  | -0.003070 |
| 7           | -2.870077 | 0.261550  | 0.057401  |
| 1           | -3.481389 | -0.504503 | -0.168771 |
| 1           | -3.202384 | 1.183239  | -0.170083 |
| 9           | -1.866367 | -2.277305 | -0.006875 |
| 1           | 0.716009  | -2.533451 | -0.003385 |
| molC_x3lyp  |           |           |           |
| 6           | 1.270700  | -0.445733 | 0.001590  |
| 6           | 0.359600  | -1.516615 | -0.000142 |
| 6           | -0.988516 | -1.259238 | 0.001265  |
| 6           | -1.528313 | 0.036245  | 0.006304  |
| 6           | -0.601380 | 1.083469  | 0.002312  |
| 6           | 0.762654  | 0.856504  | 0.000957  |
| 9           | -1.073662 | 2.344897  | -0.005235 |
| 6           | 2.674936  | -0.675975 | 0.000732  |
| 7           | 3.810938  | -0.883040 | -0.000514 |
| 9           | 1.588121  | 1.905468  | -0.003413 |
| 7           | -2.875000 | 0.264813  | 0.055612  |
| 1           | -3.492197 | -0.502053 | -0.156566 |
| 1           | -3.210161 | 1.190220  | -0.157330 |
| 9           | -1.876605 | -2.282986 | -0.007569 |
| 1           | 0.712021  | -2.538925 | -0.003958 |
| molD_apfd   |           |           |           |
| 6           | -1.467317 | -0.071548 | 0.006116  |
| 6           | -0.712993 | -1.248911 | 0.005093  |
| 6           | 0.667134  | -1.212440 | 0.004286  |
| 6           | 1.318709  | 0.023826  | 0.000544  |
| 6           | 0.572016  | 1.189351  | 0.003197  |
| 6           | -0.826767 | 1.185381  | 0.010213  |
| 7           | -1.518241 | 2.356236  | 0.057191  |
| 9           | -1.333472 | -2.422690 | 0.002317  |
| 9           | 1.188180  | 2.379976  | -0.004406 |
| 17          | 3.028429  | 0.089480  | -0.008243 |
| 6           | -2.883765 | -0.121358 | -0.005917 |
| 7           | -4.039168 | -0.079617 | -0.021922 |
| 1           | -1.028579 | 3.212441  | -0.139727 |
| 1           | -2.509645 | 2.344449  | -0.122280 |
| 9           | 1.365301  | -2.344434 | 0.003921  |

|             |           |           |           |  |
|-------------|-----------|-----------|-----------|--|
| molD_b3lypd |           |           |           |  |
| 6           | -1.475352 | -0.075063 | 0.005914  |  |
| 6           | -0.713356 | -1.249485 | 0.004891  |  |
| 6           | 0.666778  | -1.211831 | 0.004310  |  |
| 6           | 1.320907  | 0.024946  | 0.000730  |  |
| 6           | 0.568538  | 1.188138  | 0.003081  |  |
| 6           | -0.831672 | 1.184650  | 0.010165  |  |
| 7           | -1.526062 | 2.359746  | 0.057668  |  |
| 9           | -1.334556 | -2.431401 | 0.001947  |  |
| 9           | 1.182768  | 2.388770  | -0.005155 |  |
| 17          | 3.045495  | 0.093486  | -0.008223 |  |
| 6           | -2.893169 | -0.124525 | -0.005543 |  |
| 7           | -4.048233 | -0.078898 | -0.021237 |  |
| 1           | -1.032965 | 3.215474  | -0.136767 |  |
| 1           | -2.516971 | 2.349282  | -0.127549 |  |
| 9           | 1.367404  | -2.350805 | 0.004074  |  |

|           |           |           |           |  |
|-----------|-----------|-----------|-----------|--|
| molD_blyp |           |           |           |  |
| 6         | -1.494658 | -0.069314 | -0.005555 |  |
| 6         | -0.725261 | -1.254050 | -0.005194 |  |
| 6         | 0.667075  | -1.221396 | -0.004929 |  |
| 6         | 1.333003  | 0.021748  | -0.000683 |  |
| 6         | 0.575563  | 1.195724  | -0.002723 |  |
| 6         | -0.836210 | 1.199988  | -0.010468 |  |
| 7         | -1.529535 | 2.389249  | -0.065235 |  |
| 9         | -1.355802 | -2.452180 | -0.002194 |  |
| 9         | 1.202445  | 2.411729  | 0.006807  |  |
| 17        | 3.076616  | 0.085377  | 0.009210  |  |
| 6         | -2.917846 | -0.118632 | 0.007186  |  |
| 7         | -4.086550 | -0.078709 | 0.023807  |  |
| 1         | -1.028092 | 3.246149  | 0.143555  |  |
| 1         | -2.525394 | 2.384203  | 0.135954  |  |
| 9         | 1.370425  | -2.379544 | -0.005933 |  |

|                |           |           |           |  |
|----------------|-----------|-----------|-----------|--|
| molD_camb3lypd |           |           |           |  |
| 6              | -1.466886 | -0.072251 | 0.004725  |  |
| 6              | -0.710217 | -1.242864 | 0.003508  |  |
| 6              | 0.663731  | -1.207197 | 0.003078  |  |
| 6              | 1.316647  | 0.023689  | 0.000729  |  |
| 6              | 0.568254  | 1.181300  | 0.002727  |  |
| 6              | -0.827417 | 1.179661  | 0.008059  |  |
| 7              | -1.513902 | 2.353691  | 0.043462  |  |
| 9              | -1.329915 | -2.418303 | 0.001100  |  |
| 9              | 1.179027  | 2.376804  | -0.003601 |  |
| 17             | 3.032397  | 0.091033  | -0.005938 |  |
| 6              | -2.887258 | -0.123182 | -0.003376 |  |
| 7              | -4.035656 | -0.081715 | -0.015152 |  |
| 1              | -1.015699 | 3.213797  | -0.108138 |  |
| 1              | -2.509829 | 2.354731  | -0.104445 |  |
| 9              | 1.359838  | -2.342373 | 0.002351  |  |

molD\_m062x

|    |           |           |           |
|----|-----------|-----------|-----------|
| 6  | -1.467327 | -0.073534 | 0.008229  |
| 6  | -0.711958 | -1.246925 | 0.004091  |
| 6  | 0.665143  | -1.208755 | 0.002729  |
| 6  | 1.315824  | 0.025886  | 0.001262  |
| 6  | 0.566502  | 1.186459  | 0.006451  |
| 6  | -0.831275 | 1.181224  | 0.013307  |
| 7  | -1.523207 | 2.356507  | 0.066272  |
| 9  | -1.329269 | -2.419757 | -0.000623 |
| 9  | 1.175282  | 2.377527  | 0.000357  |
| 17 | 3.028912  | 0.094861  | -0.008156 |
| 6  | -2.892146 | -0.123516 | -0.001969 |
| 7  | -4.041957 | -0.079390 | -0.017107 |
| 1  | -1.026509 | 3.206388  | -0.146742 |
| 1  | -2.510772 | 2.344341  | -0.139014 |
| 9  | 1.362311  | -2.338831 | -0.000781 |

mo1D\_mp2

|    |           |           |           |
|----|-----------|-----------|-----------|
| 6  | -1.469400 | -0.072205 | 0.040472  |
| 6  | -0.714684 | -1.251622 | -0.007898 |
| 6  | 0.672804  | -1.210760 | 0.008309  |
| 6  | 1.331736  | 0.025232  | -0.021833 |
| 6  | 0.571173  | 1.192526  | 0.034664  |
| 6  | -0.828861 | 1.187174  | 0.016520  |
| 7  | -1.536501 | 2.371647  | 0.116342  |
| 9  | -1.336898 | -2.432826 | -0.011697 |
| 9  | 1.184994  | 2.386478  | 0.028333  |
| 17 | 3.042878  | 0.095770  | -0.013818 |
| 6  | -2.895038 | -0.120354 | 0.015317  |
| 7  | -4.072718 | -0.074346 | -0.009704 |
| 1  | -1.040111 | 3.197005  | -0.190490 |
| 1  | -2.497307 | 2.336230  | -0.199969 |
| 9  | 1.367486  | -2.347466 | -0.016242 |

mo1D\_pbe0d

|    |           |           |           |
|----|-----------|-----------|-----------|
| 6  | -1.466533 | -0.076556 | -0.006563 |
| 6  | -0.708396 | -1.249347 | -0.005281 |
| 6  | 0.669011  | -1.209943 | -0.004459 |
| 6  | 1.318556  | 0.025923  | -0.000600 |
| 6  | 0.567875  | 1.187180  | -0.003446 |
| 6  | -0.828988 | 1.180823  | -0.010721 |
| 7  | -1.522842 | 2.349393  | -0.059039 |
| 9  | -1.324497 | -2.421969 | -0.002354 |
| 9  | 1.176908  | 2.377818  | 0.004828  |
| 17 | 3.027226  | 0.096158  | 0.008717  |
| 6  | -2.881798 | -0.125706 | 0.005771  |
| 7  | -4.036266 | -0.081483 | 0.022462  |
| 1  | -1.031996 | 3.203312  | 0.143480  |
| 1  | -2.512209 | 2.333892  | 0.129441  |
| 9  | 1.367228  | -2.338238 | -0.003950 |

mo1D\_pbe

|   |           |           |           |
|---|-----------|-----------|-----------|
| 6 | -1.484027 | -0.076804 | -0.006551 |
| 6 | -0.716100 | -1.257597 | -0.005904 |



|    |           |           |           |
|----|-----------|-----------|-----------|
| 6  | 0.673317  | -1.218611 | -0.005216 |
| 6  | 1.330354  | 0.025768  | -0.000523 |
| 6  | 0.571583  | 1.195695  | -0.003217 |
| 6  | -0.836054 | 1.191818  | -0.011572 |
| 7  | -1.534024 | 2.369191  | -0.065387 |
| 9  | -1.338355 | -2.447506 | -0.002860 |
| 9  | 1.189253  | 2.402998  | 0.006447  |
| 17 | 3.053891  | 0.095992  | 0.010044  |
| 6  | -2.901734 | -0.124823 | 0.007773  |
| 7  | -4.071085 | -0.077842 | 0.025997  |
| 1  | -1.039314 | 3.229052  | 0.146347  |
| 1  | -2.530967 | 2.352505  | 0.130758  |
| 9  | 1.378642  | -2.362774 | -0.005907 |

molD\_rtpss

|    |           |           |           |
|----|-----------|-----------|-----------|
| 6  | -1.481715 | -0.074828 | -0.008201 |
| 6  | -0.715354 | -1.253600 | -0.007545 |
| 6  | 0.670869  | -1.216150 | -0.006999 |
| 6  | 1.327915  | 0.024497  | -0.000730 |
| 6  | 0.570028  | 1.191747  | -0.003912 |
| 6  | -0.833424 | 1.189801  | -0.012921 |
| 7  | -1.531691 | 2.372835  | -0.086593 |
| 9  | -1.339520 | -2.443544 | -0.003725 |
| 9  | 1.189490  | 2.399191  | 0.008442  |
| 17 | 3.051624  | 0.094345  | 0.012769  |
| 6  | -2.900357 | -0.122554 | 0.010013  |
| 7  | -4.067531 | -0.079200 | 0.033133  |
| 1  | -1.032604 | 3.211087  | 0.191860  |
| 1  | -2.513517 | 2.345707  | 0.174013  |
| 9  | 1.376174  | -2.361155 | -0.007712 |

molD\_wb97xd

|    |           |           |           |
|----|-----------|-----------|-----------|
| 6  | -1.466868 | -0.072000 | 0.005999  |
| 6  | -0.711525 | -1.246127 | 0.004454  |
| 6  | 0.665825  | -1.209979 | 0.003830  |
| 6  | 1.318382  | 0.023700  | 0.000597  |
| 6  | 0.569960  | 1.185259  | 0.003178  |
| 6  | -0.828097 | 1.182119  | 0.009310  |
| 7  | -1.519644 | 2.356326  | 0.055902  |
| 9  | -1.331151 | -2.418340 | 0.001829  |
| 9  | 1.181223  | 2.376997  | -0.004341 |
| 17 | 3.035850  | 0.091143  | -0.007499 |
| 6  | -2.889128 | -0.123079 | -0.004484 |
| 7  | -4.040559 | -0.083793 | -0.019505 |
| 1  | -1.026199 | 3.210115  | -0.139162 |
| 1  | -2.509110 | 2.348300  | -0.130397 |
| 9  | 1.360592  | -2.342539 | 0.003064  |

molD\_x31yp

|   |           |           |           |
|---|-----------|-----------|-----------|
| 6 | -1.476533 | -0.070127 | -0.005323 |
| 6 | -0.716158 | -1.245708 | -0.004428 |
| 6 | 0.663687  | -1.211852 | -0.003997 |
| 6 | 1.321462  | 0.022355  | -0.000684 |

|    |           |           |           |
|----|-----------|-----------|-----------|
| 6  | 0.571231  | 1.186363  | -0.002775 |
| 6  | -0.829230 | 1.187685  | -0.009303 |
| 7  | -1.516906 | 2.366506  | -0.055123 |
| 9  | -1.338249 | -2.425892 | -0.001693 |
| 9  | 1.187465  | 2.384917  | 0.004937  |
| 17 | 3.046273  | 0.087013  | 0.007565  |
| 6  | -2.895668 | -0.120774 | 0.005091  |
| 7  | -4.050367 | -0.082394 | 0.019459  |
| 1  | -1.018929 | 3.221221  | 0.130594  |
| 1  | -2.508703 | 2.364717  | 0.124256  |
| 9  | 1.359580  | -2.352537 | -0.003834 |

molE\_apfd

|    |           |           |           |
|----|-----------|-----------|-----------|
| 6  | -1.378126 | -0.097816 | 0.004863  |
| 6  | -0.770543 | -1.357430 | 0.004564  |
| 6  | 0.595823  | -1.523823 | 0.003972  |
| 6  | 1.390196  | -0.375373 | 0.000985  |
| 6  | 0.817846  | 0.881800  | 0.002499  |
| 6  | -0.571848 | 1.061568  | 0.007852  |
| 7  | -1.098768 | 2.310222  | 0.041173  |
| 9  | -1.559931 | -2.433421 | 0.002854  |
| 9  | 1.580764  | 1.987181  | -0.003570 |
| 17 | 3.106120  | -0.512605 | -0.005719 |
| 1  | 1.033866  | -2.512921 | 0.004021  |
| 6  | -2.787779 | 0.046075  | -0.004507 |
| 7  | -3.926689 | 0.247028  | -0.016821 |
| 1  | -0.497924 | 3.103259  | -0.101606 |
| 1  | -2.089108 | 2.438072  | -0.089293 |

molE\_b3lypd

|    |           |           |           |
|----|-----------|-----------|-----------|
| 6  | -1.385641 | -0.102032 | 0.005058  |
| 6  | -0.768272 | -1.358292 | 0.004732  |
| 6  | 0.598860  | -1.522703 | 0.004257  |
| 6  | 1.392256  | -0.370967 | 0.001185  |
| 6  | 0.812493  | 0.883565  | 0.002616  |
| 6  | -0.578693 | 1.061585  | 0.008308  |
| 7  | -1.110526 | 2.314103  | 0.044419  |
| 9  | -1.556123 | -2.445374 | 0.002786  |
| 9  | 1.573489  | 2.000118  | -0.004350 |
| 17 | 3.123013  | -0.511401 | -0.006061 |
| 1  | 1.038728  | -2.508781 | 0.004374  |
| 6  | -2.796970 | 0.038945  | -0.004485 |
| 7  | -3.935518 | 0.240708  | -0.017398 |
| 1  | -0.508259 | 3.105601  | -0.106886 |
| 1  | -2.099863 | 2.440022  | -0.099551 |

molE\_blyp

|   |           |           |           |
|---|-----------|-----------|-----------|
| 6 | -1.403862 | -0.097443 | -0.005208 |
| 6 | -0.777828 | -1.363377 | -0.005658 |
| 6 | 0.599698  | -1.533656 | -0.005477 |
| 6 | 1.402848  | -0.376445 | -0.001479 |
| 6 | 0.818996  | 0.889097  | -0.002513 |
| 6 | -0.582695 | 1.074683  | -0.009011 |

|    |           |           |           |
|----|-----------|-----------|-----------|
| 7  | -1.113462 | 2.340838  | -0.053587 |
| 9  | -1.575121 | -2.467923 | -0.003682 |
| 9  | 1.593363  | 2.019935  | 0.006093  |
| 17 | 3.153065  | -0.523804 | 0.006976  |
| 1  | 1.037712  | -2.527829 | -0.006544 |
| 6  | -2.820791 | 0.042218  | 0.006059  |
| 7  | -3.973947 | 0.237912  | 0.020716  |
| 1  | -0.503811 | 3.132040  | 0.121336  |
| 1  | -2.106525 | 2.470637  | 0.114741  |

molE\_camb3lypd

|    |           |           |           |
|----|-----------|-----------|-----------|
| 6  | -1.377347 | -0.099480 | 0.002430  |
| 6  | -0.765464 | -1.351960 | 0.002031  |
| 6  | 0.595420  | -1.518973 | 0.001782  |
| 6  | 1.387502  | -0.372077 | 0.000577  |
| 6  | 0.811337  | 0.876508  | 0.001404  |
| 6  | -0.575231 | 1.056767  | 0.004097  |
| 7  | -1.098267 | 2.306854  | 0.020189  |
| 9  | -1.553493 | -2.430705 | 0.001031  |
| 9  | 1.568841  | 1.988211  | -0.001855 |
| 17 | 3.109069  | -0.510248 | -0.002750 |
| 1  | 1.032599  | -2.506002 | 0.001634  |
| 6  | -2.791188 | 0.041070  | -0.001748 |
| 7  | -3.923537 | 0.239017  | -0.007639 |
| 1  | -0.490018 | 3.103556  | -0.050366 |
| 1  | -2.092428 | 2.446859  | -0.048393 |

molE\_m062x

|    |           |           |           |
|----|-----------|-----------|-----------|
| 6  | -1.377613 | -0.101737 | 0.006247  |
| 6  | -0.766676 | -1.356913 | 0.004139  |
| 6  | 0.598153  | -1.521457 | 0.003212  |
| 6  | 1.387852  | -0.369607 | 0.001430  |
| 6  | 0.810380  | 0.881727  | 0.004472  |
| 6  | -0.579017 | 1.057976  | 0.009888  |
| 7  | -1.107607 | 2.309409  | 0.048555  |
| 9  | -1.553461 | -2.431454 | 0.001260  |
| 9  | 1.563981  | 1.989935  | -0.001163 |
| 17 | 3.107559  | -0.499229 | -0.005931 |
| 1  | 1.038576  | -2.507846 | 0.001853  |
| 6  | -2.795736 | 0.040272  | -0.002406 |
| 7  | -3.929071 | 0.241265  | -0.014819 |
| 1  | -0.502476 | 3.097378  | -0.112079 |
| 1  | -2.095871 | 2.435379  | -0.105655 |

molE\_mp2

|   |           |           |           |
|---|-----------|-----------|-----------|
| 6 | -1.379788 | -0.099004 | 0.046510  |
| 6 | -0.771074 | -1.360187 | -0.005389 |
| 6 | 0.603880  | -1.521218 | 0.008278  |
| 6 | 1.404383  | -0.371747 | -0.018577 |
| 6 | 0.815849  | 0.887736  | 0.040621  |
| 6 | -0.575534 | 1.062909  | 0.023483  |
| 7 | -1.118550 | 2.327910  | 0.117384  |
| 9 | -1.560999 | -2.445080 | -0.012662 |

|    |           |           |           |
|----|-----------|-----------|-----------|
| 9  | 1.573850  | 1.998117  | 0.032512  |
| 17 | 3.120497  | -0.505271 | -0.017395 |
| 1  | 1.043149  | -2.511390 | -0.024581 |
| 6  | -2.799020 | 0.044894  | 0.016851  |
| 7  | -3.959538 | 0.249494  | -0.009874 |
| 1  | -0.517562 | 3.085089  | -0.176675 |
| 1  | -2.080568 | 2.422846  | -0.181479 |

molE\_pbe0d

|    |           |           |           |
|----|-----------|-----------|-----------|
| 6  | -1.377694 | -0.102988 | -0.005333 |
| 6  | -0.765013 | -1.357997 | -0.004832 |
| 6  | 0.599587  | -1.520277 | -0.004201 |
| 6  | 1.390747  | -0.370718 | -0.001054 |
| 6  | 0.813135  | 0.882134  | -0.002780 |
| 6  | -0.575187 | 1.057866  | -0.008467 |
| 7  | -1.105618 | 2.304046  | -0.043631 |
| 9  | -1.547956 | -2.434433 | -0.002955 |
| 9  | 1.567843  | 1.989203  | 0.003961  |
| 17 | 3.105260  | -0.506274 | 0.006238  |
| 1  | 1.041240  | -2.507062 | -0.004123 |
| 6  | -2.786144 | 0.040335  | 0.004524  |
| 7  | -3.923926 | 0.242844  | 0.017687  |
| 1  | -0.504542 | 3.095142  | 0.106892  |
| 1  | -2.094881 | 2.427304  | 0.096611  |

molE\_pbe

|    |           |           |           |
|----|-----------|-----------|-----------|
| 6  | -1.394226 | -0.102701 | -0.005780 |
| 6  | -0.771846 | -1.366172 | -0.005988 |
| 6  | 0.603205  | -1.531368 | -0.005502 |
| 6  | 1.401877  | -0.375352 | -0.001329 |
| 6  | 0.818326  | 0.887653  | -0.002809 |
| 6  | -0.580009 | 1.067632  | -0.009561 |
| 7  | -1.113510 | 2.323724  | -0.051516 |
| 9  | -1.563178 | -2.460031 | -0.004036 |
| 9  | 1.584007  | 2.009746  | 0.005562  |
| 17 | 3.132110  | -0.512906 | 0.007392  |
| 1  | 1.046034  | -2.525801 | -0.006295 |
| 6  | -2.805092 | 0.041805  | 0.006295  |
| 7  | -3.957297 | 0.248326  | 0.021647  |
| 1  | -0.507639 | 3.118645  | 0.118057  |
| 1  | -2.109478 | 2.445783  | 0.105979  |

molE\_rtpss

|    |           |           |           |
|----|-----------|-----------|-----------|
| 6  | -1.391166 | -0.100228 | -0.008098 |
| 6  | -0.770820 | -1.361721 | -0.008579 |
| 6  | 0.601786  | -1.533684 | -0.008209 |
| 6  | 1.397948  | -0.377722 | -0.001977 |
| 6  | 0.816027  | 0.883000  | -0.003825 |
| 6  | -0.577373 | 1.065870  | -0.012018 |
| 7  | -1.109593 | 2.327883  | -0.076671 |
| 9  | -1.567317 | -2.453619 | -0.005861 |
| 9  | 1.584757  | 2.004227  | 0.008226  |
| 17 | 3.129078  | -0.512870 | 0.010459  |

|   |           |           |           |
|---|-----------|-----------|-----------|
| 1 | 1.042469  | -2.524646 | -0.009271 |
| 6 | -2.802946 | 0.044683  | 0.009084  |
| 7 | -3.953415 | 0.247705  | 0.030890  |
| 1 | -0.501888 | 3.099820  | 0.174021  |
| 1 | -2.091547 | 2.437845  | 0.158356  |

molE\_wb97xd

|    |           |           |           |
|----|-----------|-----------|-----------|
| 6  | -1.377759 | -0.100649 | 0.004680  |
| 6  | -0.765410 | -1.355590 | 0.003896  |
| 6  | 0.598743  | -1.518832 | 0.003399  |
| 6  | 1.389735  | -0.369379 | 0.000890  |
| 6  | 0.812637  | 0.882399  | 0.002471  |
| 6  | -0.577085 | 1.058848  | 0.007168  |
| 7  | -1.106750 | 2.308974  | 0.039590  |
| 9  | -1.548774 | -2.433686 | 0.002271  |
| 9  | 1.568136  | 1.991547  | -0.003461 |
| 17 | 3.112831  | -0.509496 | -0.005220 |
| 1  | 1.038719  | -2.505547 | 0.003154  |
| 6  | -2.793610 | 0.038462  | -0.003467 |
| 7  | -3.929518 | 0.233202  | -0.014841 |
| 1  | -0.504822 | 3.101215  | -0.098733 |
| 1  | -2.095927 | 2.438225  | -0.092433 |

molE\_x31yp

|    |           |           |           |
|----|-----------|-----------|-----------|
| 6  | -1.386772 | -0.098070 | -0.004419 |
| 6  | -0.770427 | -1.354998 | -0.004180 |
| 6  | 0.596098  | -1.522445 | -0.003824 |
| 6  | 1.392073  | -0.372885 | -0.001070 |
| 6  | 0.813759  | 0.881764  | -0.002287 |
| 6  | -0.577221 | 1.063700  | -0.007376 |
| 7  | -1.102672 | 2.318600  | -0.040951 |
| 9  | -1.558676 | -2.440345 | -0.002446 |
| 9  | 1.575718  | 1.996539  | 0.004019  |
| 17 | 3.122728  | -0.515344 | 0.005388  |
| 1  | 1.032509  | -2.510299 | -0.003996 |
| 6  | -2.799643 | 0.041071  | 0.004005  |
| 7  | -3.938924 | 0.234948  | 0.015446  |
| 1  | -0.496272 | 3.108990  | 0.098399  |
| 1  | -2.092041 | 2.452751  | 0.093290  |

## Internal Coordinates

### molA\_apfd

|    |    |    |    |    |          |
|----|----|----|----|----|----------|
| I= | 1  | J= | 2  | B= | 1.399900 |
| I= | 1  | J= | 6  | B= | 1.399900 |
| I= | 1  | J= | 9  | B= | 1.416944 |
| I= | 2  | J= | 3  | B= | 1.379715 |
| I= | 2  | J= | 7  | B= | 1.326105 |
| I= | 3  | J= | 4  | B= | 1.399840 |
| I= | 3  | J= | 11 | B= | 1.340549 |
| I= | 4  | J= | 5  | B= | 1.399840 |
| I= | 4  | J= | 13 | B= | 1.359589 |
| I= | 5  | J= | 6  | B= | 1.379715 |
| I= | 5  | J= | 8  | B= | 1.340549 |
| I= | 6  | J= | 12 | B= | 1.326105 |
| I= | 9  | J= | 10 | B= | 1.155051 |
| I= | 13 | J= | 14 | B= | 1.006155 |
| I= | 13 | J= | 15 | B= | 1.006155 |

|    |   |    |    |    |    |    |         |
|----|---|----|----|----|----|----|---------|
| I= | 1 | J= | 2  | K= | 3  | A= | 120.985 |
| I= | 1 | J= | 2  | K= | 7  | A= | 119.838 |
| I= | 1 | J= | 6  | K= | 12 | A= | 119.838 |
| I= | 1 | J= | 9  | K= | 10 | A= | 179.977 |
| I= | 2 | J= | 3  | K= | 4  | A= | 121.612 |
| I= | 2 | J= | 3  | K= | 11 | A= | 120.298 |
| I= | 3 | J= | 4  | K= | 5  | A= | 117.100 |
| I= | 3 | J= | 4  | K= | 13 | A= | 121.436 |
| I= | 4 | J= | 5  | K= | 6  | A= | 121.612 |
| I= | 4 | J= | 5  | K= | 8  | A= | 118.089 |
| I= | 4 | J= | 13 | K= | 14 | A= | 118.458 |
| I= | 4 | J= | 13 | K= | 15 | A= | 118.458 |
| I= | 5 | J= | 6  | K= | 12 | A= | 119.176 |

|    |   |    |   |    |    |    |    |    |         |
|----|---|----|---|----|----|----|----|----|---------|
| I= | 1 | J= | 2 | K= | 3  | L= | 4  | D= | 0.035   |
| I= | 1 | J= | 2 | K= | 3  | L= | 11 | D= | 179.686 |
| I= | 2 | J= | 3 | K= | 4  | L= | 5  | D= | 0.273   |
| I= | 2 | J= | 3 | K= | 4  | L= | 13 | D= | 177.824 |
| I= | 3 | J= | 4 | K= | 5  | L= | 6  | D= | 0.273   |
| I= | 3 | J= | 4 | K= | 5  | L= | 8  | D= | 179.455 |
| I= | 3 | J= | 4 | K= | 13 | L= | 14 | D= | 15.084  |
| I= | 3 | J= | 4 | K= | 13 | L= | 15 | D= | 166.903 |
| I= | 4 | J= | 5 | K= | 6  | L= | 12 | D= | 179.954 |

### molA\_b3lypd

|    |   |    |    |    |          |
|----|---|----|----|----|----------|
| I= | 1 | J= | 2  | B= | 1.402247 |
| I= | 1 | J= | 6  | B= | 1.402249 |
| I= | 1 | J= | 9  | B= | 1.418578 |
| I= | 2 | J= | 3  | B= | 1.379480 |
| I= | 2 | J= | 7  | B= | 1.333397 |
| I= | 3 | J= | 4  | B= | 1.401510 |
| I= | 3 | J= | 11 | B= | 1.348097 |
| I= | 4 | J= | 5  | B= | 1.401511 |
| I= | 4 | J= | 13 | B= | 1.364471 |

|    |    |    |    |    |          |
|----|----|----|----|----|----------|
| I= | 5  | J= | 6  | B= | 1.379479 |
| I= | 5  | J= | 8  | B= | 1.348096 |
| I= | 6  | J= | 12 | B= | 1.333397 |
| I= | 9  | J= | 10 | B= | 1.154914 |
| I= | 13 | J= | 14 | B= | 1.006964 |
| I= | 13 | J= | 15 | B= | 1.006964 |

|    |   |    |    |    |    |    |         |
|----|---|----|----|----|----|----|---------|
| I= | 1 | J= | 2  | K= | 3  | A= | 121.191 |
| I= | 1 | J= | 2  | K= | 7  | A= | 119.676 |
| I= | 1 | J= | 6  | K= | 12 | A= | 119.676 |
| I= | 1 | J= | 9  | K= | 10 | A= | 179.975 |
| I= | 2 | J= | 3  | K= | 4  | A= | 121.765 |
| I= | 2 | J= | 3  | K= | 11 | A= | 120.308 |
| I= | 3 | J= | 4  | K= | 5  | A= | 116.790 |
| I= | 3 | J= | 4  | K= | 13 | A= | 121.591 |
| I= | 4 | J= | 5  | K= | 6  | A= | 121.765 |
| I= | 4 | J= | 5  | K= | 8  | A= | 117.926 |
| I= | 4 | J= | 13 | K= | 14 | A= | 118.375 |
| I= | 4 | J= | 13 | K= | 15 | A= | 118.375 |
| I= | 5 | J= | 6  | K= | 12 | A= | 119.133 |

|    |   |    |   |    |    |    |    |    |         |
|----|---|----|---|----|----|----|----|----|---------|
| I= | 1 | J= | 2 | K= | 3  | L= | 4  | D= | 0.070   |
| I= | 1 | J= | 2 | K= | 3  | L= | 11 | D= | 179.667 |
| I= | 2 | J= | 3 | K= | 4  | L= | 5  | D= | 0.327   |
| I= | 2 | J= | 3 | K= | 4  | L= | 13 | D= | 177.792 |
| I= | 3 | J= | 4 | K= | 5  | L= | 6  | D= | 0.327   |
| I= | 3 | J= | 4 | K= | 5  | L= | 8  | D= | 179.416 |
| I= | 3 | J= | 4 | K= | 13 | L= | 14 | D= | 15.097  |
| I= | 3 | J= | 4 | K= | 13 | L= | 15 | D= | 166.874 |
| I= | 4 | J= | 5 | K= | 6  | L= | 12 | D= | 179.968 |

molA\_blyp

|    |    |    |    |    |          |
|----|----|----|----|----|----------|
| I= | 1  | J= | 2  | B= | 1.415783 |
| I= | 1  | J= | 6  | B= | 1.415783 |
| I= | 1  | J= | 9  | B= | 1.423836 |
| I= | 2  | J= | 3  | B= | 1.390810 |
| I= | 2  | J= | 7  | B= | 1.352090 |
| I= | 3  | J= | 4  | B= | 1.413483 |
| I= | 3  | J= | 11 | B= | 1.366963 |
| I= | 4  | J= | 5  | B= | 1.413483 |
| I= | 4  | J= | 13 | B= | 1.376699 |
| I= | 5  | J= | 6  | B= | 1.390810 |
| I= | 5  | J= | 8  | B= | 1.366963 |
| I= | 6  | J= | 12 | B= | 1.352090 |
| I= | 9  | J= | 10 | B= | 1.168259 |
| I= | 13 | J= | 14 | B= | 1.014927 |
| I= | 13 | J= | 15 | B= | 1.014927 |

|    |   |    |   |    |    |    |         |
|----|---|----|---|----|----|----|---------|
| I= | 1 | J= | 2 | K= | 3  | A= | 121.367 |
| I= | 1 | J= | 2 | K= | 7  | A= | 119.605 |
| I= | 1 | J= | 6 | K= | 12 | A= | 119.605 |
| I= | 1 | J= | 9 | K= | 10 | A= | 179.970 |
| I= | 2 | J= | 3 | K= | 4  | A= | 121.931 |
| I= | 2 | J= | 3 | K= | 11 | A= | 120.209 |
| I= | 3 | J= | 4 | K= | 5  | A= | 116.506 |

|    |   |    |    |    |    |    |         |
|----|---|----|----|----|----|----|---------|
| I= | 3 | J= | 4  | K= | 13 | A= | 121.729 |
| I= | 4 | J= | 5  | K= | 6  | A= | 121.931 |
| I= | 4 | J= | 5  | K= | 8  | A= | 117.859 |
| I= | 4 | J= | 13 | K= | 14 | A= | 118.093 |
| I= | 4 | J= | 13 | K= | 15 | A= | 118.093 |
| I= | 5 | J= | 6  | K= | 12 | A= | 119.028 |

|    |   |    |   |    |    |    |    |    |         |
|----|---|----|---|----|----|----|----|----|---------|
| I= | 1 | J= | 2 | K= | 3  | L= | 4  | D= | 0.089   |
| I= | 1 | J= | 2 | K= | 3  | L= | 11 | D= | 179.628 |
| I= | 2 | J= | 3 | K= | 4  | L= | 5  | D= | 0.387   |
| I= | 2 | J= | 3 | K= | 4  | L= | 13 | D= | 177.426 |
| I= | 3 | J= | 4 | K= | 5  | L= | 6  | D= | 0.387   |
| I= | 3 | J= | 4 | K= | 5  | L= | 8  | D= | 179.336 |
| I= | 3 | J= | 4 | K= | 13 | L= | 14 | D= | 16.409  |
| I= | 3 | J= | 4 | K= | 13 | L= | 15 | D= | 165.893 |
| I= | 4 | J= | 5 | K= | 6  | L= | 12 | D= | 179.962 |

molA\_camb3lypd

|    |    |    |    |    |          |
|----|----|----|----|----|----------|
| I= | 1  | J= | 2  | B= | 1.394848 |
| I= | 1  | J= | 6  | B= | 1.394848 |
| I= | 1  | J= | 9  | B= | 1.420991 |
| I= | 2  | J= | 3  | B= | 1.374357 |
| I= | 2  | J= | 7  | B= | 1.326970 |
| I= | 3  | J= | 4  | B= | 1.395306 |
| I= | 3  | J= | 11 | B= | 1.341921 |
| I= | 4  | J= | 5  | B= | 1.395306 |
| I= | 4  | J= | 13 | B= | 1.358644 |
| I= | 5  | J= | 6  | B= | 1.374357 |
| I= | 5  | J= | 8  | B= | 1.341921 |
| I= | 6  | J= | 12 | B= | 1.326970 |
| I= | 9  | J= | 10 | B= | 1.148090 |
| I= | 13 | J= | 14 | B= | 1.005790 |
| I= | 13 | J= | 15 | B= | 1.005790 |

|    |   |    |    |    |    |    |         |
|----|---|----|----|----|----|----|---------|
| I= | 1 | J= | 2  | K= | 3  | A= | 121.181 |
| I= | 1 | J= | 2  | K= | 7  | A= | 119.758 |
| I= | 1 | J= | 6  | K= | 12 | A= | 119.758 |
| I= | 1 | J= | 9  | K= | 10 | A= | 179.981 |
| I= | 2 | J= | 3  | K= | 4  | A= | 121.741 |
| I= | 2 | J= | 3  | K= | 11 | A= | 120.313 |
| I= | 3 | J= | 4  | K= | 5  | A= | 116.790 |
| I= | 3 | J= | 4  | K= | 13 | A= | 121.597 |
| I= | 4 | J= | 5  | K= | 6  | A= | 121.741 |
| I= | 4 | J= | 5  | K= | 8  | A= | 117.946 |
| I= | 4 | J= | 13 | K= | 14 | A= | 119.028 |
| I= | 4 | J= | 13 | K= | 15 | A= | 119.028 |
| I= | 5 | J= | 6  | K= | 12 | A= | 119.061 |

|    |   |    |   |    |    |    |    |    |         |
|----|---|----|---|----|----|----|----|----|---------|
| I= | 1 | J= | 2 | K= | 3  | L= | 4  | D= | 0.056   |
| I= | 1 | J= | 2 | K= | 3  | L= | 11 | D= | 179.731 |
| I= | 2 | J= | 3 | K= | 4  | L= | 5  | D= | 0.259   |
| I= | 2 | J= | 3 | K= | 4  | L= | 13 | D= | 178.323 |
| I= | 3 | J= | 4 | K= | 5  | L= | 6  | D= | 0.259   |
| I= | 3 | J= | 4 | K= | 5  | L= | 8  | D= | 179.534 |
| I= | 3 | J= | 4 | K= | 13 | L= | 14 | D= | 12.095  |



|    |   |    |   |    |    |    |    |    |         |
|----|---|----|---|----|----|----|----|----|---------|
| I= | 3 | J= | 4 | K= | 13 | L= | 15 | D= | 169.392 |
| I= | 4 | J= | 5 | K= | 6  | L= | 12 | D= | 179.986 |

molA\_m062x

|    |    |    |    |    |          |
|----|----|----|----|----|----------|
| I= | 1  | J= | 2  | B= | 1.396454 |
| I= | 1  | J= | 6  | B= | 1.396454 |
| I= | 1  | J= | 9  | B= | 1.425184 |
| I= | 2  | J= | 3  | B= | 1.377340 |
| I= | 2  | J= | 7  | B= | 1.323777 |
| I= | 3  | J= | 4  | B= | 1.397286 |
| I= | 3  | J= | 11 | B= | 1.337422 |
| I= | 4  | J= | 5  | B= | 1.397286 |
| I= | 4  | J= | 13 | B= | 1.363441 |
| I= | 5  | J= | 6  | B= | 1.377340 |
| I= | 5  | J= | 8  | B= | 1.337422 |
| I= | 6  | J= | 12 | B= | 1.323777 |
| I= | 9  | J= | 10 | B= | 1.149601 |
| I= | 13 | J= | 14 | B= | 1.007458 |
| I= | 13 | J= | 15 | B= | 1.007457 |

|    |   |    |    |    |    |    |         |
|----|---|----|----|----|----|----|---------|
| I= | 1 | J= | 2  | K= | 3  | A= | 121.028 |
| I= | 1 | J= | 2  | K= | 7  | A= | 119.853 |
| I= | 1 | J= | 6  | K= | 12 | A= | 119.853 |
| I= | 1 | J= | 9  | K= | 10 | A= | 179.977 |
| I= | 2 | J= | 3  | K= | 4  | A= | 121.637 |
| I= | 2 | J= | 3  | K= | 11 | A= | 120.352 |
| I= | 3 | J= | 4  | K= | 5  | A= | 117.010 |
| I= | 3 | J= | 4  | K= | 13 | A= | 121.477 |
| I= | 4 | J= | 5  | K= | 6  | A= | 121.637 |
| I= | 4 | J= | 5  | K= | 8  | A= | 118.010 |
| I= | 4 | J= | 13 | K= | 14 | A= | 117.926 |
| I= | 4 | J= | 13 | K= | 15 | A= | 117.926 |
| I= | 5 | J= | 6  | K= | 12 | A= | 119.119 |

|    |   |    |   |    |    |    |    |    |         |
|----|---|----|---|----|----|----|----|----|---------|
| I= | 1 | J= | 2 | K= | 3  | L= | 4  | D= | 0.016   |
| I= | 1 | J= | 2 | K= | 3  | L= | 11 | D= | 179.669 |
| I= | 2 | J= | 3 | K= | 4  | L= | 5  | D= | 0.193   |
| I= | 2 | J= | 3 | K= | 4  | L= | 13 | D= | 177.683 |
| I= | 3 | J= | 4 | K= | 5  | L= | 6  | D= | 0.193   |
| I= | 3 | J= | 4 | K= | 5  | L= | 8  | D= | 179.468 |
| I= | 3 | J= | 4 | K= | 13 | L= | 14 | D= | 16.491  |
| I= | 3 | J= | 4 | K= | 13 | L= | 15 | D= | 165.728 |
| I= | 4 | J= | 5 | K= | 6  | L= | 12 | D= | 179.920 |

molA\_mp2

|    |   |    |    |    |          |
|----|---|----|----|----|----------|
| I= | 1 | J= | 2  | B= | 1.402330 |
| I= | 1 | J= | 6  | B= | 1.402270 |
| I= | 1 | J= | 9  | B= | 1.426422 |
| I= | 2 | J= | 3  | B= | 1.387617 |
| I= | 2 | J= | 7  | B= | 1.333924 |
| I= | 3 | J= | 4  | B= | 1.401589 |
| I= | 3 | J= | 11 | B= | 1.341702 |
| I= | 4 | J= | 5  | B= | 1.401571 |
| I= | 4 | J= | 13 | B= | 1.381505 |

|    |    |    |    |    |          |
|----|----|----|----|----|----------|
| I= | 5  | J= | 6  | B= | 1.387804 |
| I= | 5  | J= | 8  | B= | 1.341658 |
| I= | 6  | J= | 12 | B= | 1.333860 |
| I= | 9  | J= | 10 | B= | 1.177799 |
| I= | 13 | J= | 14 | B= | 1.010799 |
| I= | 13 | J= | 15 | B= | 1.010798 |

|    |   |    |    |    |    |    |         |
|----|---|----|----|----|----|----|---------|
| I= | 1 | J= | 2  | K= | 3  | A= | 120.785 |
| I= | 1 | J= | 2  | K= | 7  | A= | 119.894 |
| I= | 1 | J= | 6  | K= | 12 | A= | 119.911 |
| I= | 1 | J= | 9  | K= | 10 | A= | 179.816 |
| I= | 2 | J= | 3  | K= | 4  | A= | 121.682 |
| I= | 2 | J= | 3  | K= | 11 | A= | 120.040 |
| I= | 3 | J= | 4  | K= | 5  | A= | 116.965 |
| I= | 3 | J= | 4  | K= | 13 | A= | 121.332 |
| I= | 4 | J= | 5  | K= | 6  | A= | 121.682 |
| I= | 4 | J= | 5  | K= | 8  | A= | 118.156 |
| I= | 4 | J= | 13 | K= | 14 | A= | 115.227 |
| I= | 4 | J= | 13 | K= | 15 | A= | 115.231 |
| I= | 5 | J= | 6  | K= | 12 | A= | 119.240 |

|    |   |    |   |    |    |    |    |    |         |
|----|---|----|---|----|----|----|----|----|---------|
| I= | 1 | J= | 2 | K= | 3  | L= | 4  | D= | 4.756   |
| I= | 1 | J= | 2 | K= | 3  | L= | 11 | D= | 179.376 |
| I= | 2 | J= | 3 | K= | 4  | L= | 5  | D= | 4.448   |
| I= | 2 | J= | 3 | K= | 4  | L= | 13 | D= | 177.731 |
| I= | 3 | J= | 4 | K= | 5  | L= | 6  | D= | 4.432   |
| I= | 3 | J= | 4 | K= | 5  | L= | 8  | D= | 179.598 |
| I= | 3 | J= | 4 | K= | 13 | L= | 14 | D= | 25.686  |
| I= | 3 | J= | 4 | K= | 13 | L= | 15 | D= | 161.363 |
| I= | 4 | J= | 5 | K= | 6  | L= | 12 | D= | 178.327 |

molA\_pbe0d

|    |    |    |    |    |          |
|----|----|----|----|----|----------|
| I= | 1  | J= | 2  | B= | 1.398326 |
| I= | 1  | J= | 6  | B= | 1.398326 |
| I= | 1  | J= | 9  | B= | 1.416012 |
| I= | 2  | J= | 3  | B= | 1.377018 |
| I= | 2  | J= | 7  | B= | 1.323009 |
| I= | 3  | J= | 4  | B= | 1.397974 |
| I= | 3  | J= | 11 | B= | 1.337348 |
| I= | 4  | J= | 5  | B= | 1.397974 |
| I= | 4  | J= | 13 | B= | 1.359074 |
| I= | 5  | J= | 6  | B= | 1.377018 |
| I= | 5  | J= | 8  | B= | 1.337348 |
| I= | 6  | J= | 12 | B= | 1.323009 |
| I= | 9  | J= | 10 | B= | 1.154211 |
| I= | 13 | J= | 14 | B= | 1.005904 |
| I= | 13 | J= | 15 | B= | 1.005904 |

|    |   |    |   |    |    |    |         |
|----|---|----|---|----|----|----|---------|
| I= | 1 | J= | 2 | K= | 3  | A= | 121.062 |
| I= | 1 | J= | 2 | K= | 7  | A= | 119.775 |
| I= | 1 | J= | 6 | K= | 12 | A= | 119.775 |
| I= | 1 | J= | 9 | K= | 10 | A= | 179.976 |
| I= | 2 | J= | 3 | K= | 4  | A= | 121.677 |
| I= | 2 | J= | 3 | K= | 11 | A= | 120.335 |
| I= | 3 | J= | 4 | K= | 5  | A= | 116.973 |

|    |   |    |    |    |    |    |         |
|----|---|----|----|----|----|----|---------|
| I= | 3 | J= | 4  | K= | 13 | A= | 121.498 |
| I= | 4 | J= | 5  | K= | 6  | A= | 121.677 |
| I= | 4 | J= | 5  | K= | 8  | A= | 117.987 |
| I= | 4 | J= | 13 | K= | 14 | A= | 118.191 |
| I= | 4 | J= | 13 | K= | 15 | A= | 118.191 |
| I= | 5 | J= | 6  | K= | 12 | A= | 119.163 |

|    |   |    |   |    |    |    |    |    |         |
|----|---|----|---|----|----|----|----|----|---------|
| I= | 1 | J= | 2 | K= | 3  | L= | 4  | D= | 0.030   |
| I= | 1 | J= | 2 | K= | 3  | L= | 11 | D= | 179.659 |
| I= | 2 | J= | 3 | K= | 4  | L= | 5  | D= | 0.277   |
| I= | 2 | J= | 3 | K= | 4  | L= | 13 | D= | 177.767 |
| I= | 3 | J= | 4 | K= | 5  | L= | 6  | D= | 0.277   |
| I= | 3 | J= | 4 | K= | 5  | L= | 8  | D= | 179.419 |
| I= | 3 | J= | 4 | K= | 13 | L= | 14 | D= | 15.625  |
| I= | 3 | J= | 4 | K= | 13 | L= | 15 | D= | 166.420 |
| I= | 4 | J= | 5 | K= | 6  | L= | 12 | D= | 179.947 |

molA\_pbe

|    |    |    |    |    |          |
|----|----|----|----|----|----------|
| I= | 1  | J= | 2  | B= | 1.411479 |
| I= | 1  | J= | 6  | B= | 1.411479 |
| I= | 1  | J= | 9  | B= | 1.418617 |
| I= | 2  | J= | 3  | B= | 1.388120 |
| I= | 2  | J= | 7  | B= | 1.341194 |
| I= | 3  | J= | 4  | B= | 1.409503 |
| I= | 3  | J= | 11 | B= | 1.355630 |
| I= | 4  | J= | 5  | B= | 1.409503 |
| I= | 4  | J= | 13 | B= | 1.369615 |
| I= | 5  | J= | 6  | B= | 1.388120 |
| I= | 5  | J= | 8  | B= | 1.355630 |
| I= | 6  | J= | 12 | B= | 1.341194 |
| I= | 9  | J= | 10 | B= | 1.169090 |
| I= | 13 | J= | 14 | B= | 1.014788 |
| I= | 13 | J= | 15 | B= | 1.014788 |

|    |   |    |    |    |    |    |         |
|----|---|----|----|----|----|----|---------|
| I= | 1 | J= | 2  | K= | 3  | A= | 121.199 |
| I= | 1 | J= | 2  | K= | 7  | A= | 119.699 |
| I= | 1 | J= | 6  | K= | 12 | A= | 119.699 |
| I= | 1 | J= | 9  | K= | 10 | A= | 179.970 |
| I= | 2 | J= | 3  | K= | 4  | A= | 121.818 |
| I= | 2 | J= | 3  | K= | 11 | A= | 120.291 |
| I= | 3 | J= | 4  | K= | 5  | A= | 116.750 |
| I= | 3 | J= | 4  | K= | 13 | A= | 121.607 |
| I= | 4 | J= | 5  | K= | 6  | A= | 121.818 |
| I= | 4 | J= | 5  | K= | 8  | A= | 117.891 |
| I= | 4 | J= | 13 | K= | 14 | A= | 117.954 |
| I= | 4 | J= | 13 | K= | 15 | A= | 117.954 |
| I= | 5 | J= | 6  | K= | 12 | A= | 119.102 |

|    |   |    |   |    |    |    |    |    |         |
|----|---|----|---|----|----|----|----|----|---------|
| I= | 1 | J= | 2 | K= | 3  | L= | 4  | D= | 0.062   |
| I= | 1 | J= | 2 | K= | 3  | L= | 11 | D= | 179.612 |
| I= | 2 | J= | 3 | K= | 4  | L= | 5  | D= | 0.363   |
| I= | 2 | J= | 3 | K= | 4  | L= | 13 | D= | 177.464 |
| I= | 3 | J= | 4 | K= | 5  | L= | 6  | D= | 0.363   |
| I= | 3 | J= | 4 | K= | 5  | L= | 8  | D= | 179.318 |
| I= | 3 | J= | 4 | K= | 13 | L= | 14 | D= | 16.561  |

|    |   |    |   |    |    |    |    |    |         |
|----|---|----|---|----|----|----|----|----|---------|
| I= | 3 | J= | 4 | K= | 13 | L= | 15 | D= | 165.718 |
| I= | 4 | J= | 5 | K= | 6  | L= | 12 | D= | 179.948 |

molA\_rtpss

|    |    |    |    |    |          |
|----|----|----|----|----|----------|
| I= | 1  | J= | 2  | B= | 1.408821 |
| I= | 1  | J= | 6  | B= | 1.408821 |
| I= | 1  | J= | 9  | B= | 1.419023 |
| I= | 2  | J= | 3  | B= | 1.385077 |
| I= | 2  | J= | 7  | B= | 1.342073 |
| I= | 3  | J= | 4  | B= | 1.405691 |
| I= | 3  | J= | 11 | B= | 1.356615 |
| I= | 4  | J= | 5  | B= | 1.405691 |
| I= | 4  | J= | 13 | B= | 1.374953 |
| I= | 5  | J= | 6  | B= | 1.385077 |
| I= | 5  | J= | 8  | B= | 1.356615 |
| I= | 6  | J= | 12 | B= | 1.342073 |
| I= | 9  | J= | 10 | B= | 1.166905 |
| I= | 13 | J= | 14 | B= | 1.014832 |
| I= | 13 | J= | 15 | B= | 1.014832 |

|    |   |    |    |    |    |    |         |
|----|---|----|----|----|----|----|---------|
| I= | 1 | J= | 2  | K= | 3  | A= | 121.249 |
| I= | 1 | J= | 2  | K= | 7  | A= | 119.632 |
| I= | 1 | J= | 6  | K= | 12 | A= | 119.632 |
| I= | 1 | J= | 9  | K= | 10 | A= | 179.967 |
| I= | 2 | J= | 3  | K= | 4  | A= | 121.869 |
| I= | 2 | J= | 3  | K= | 11 | A= | 120.274 |
| I= | 3 | J= | 4  | K= | 5  | A= | 116.688 |
| I= | 3 | J= | 4  | K= | 13 | A= | 121.619 |
| I= | 4 | J= | 5  | K= | 6  | A= | 121.869 |
| I= | 4 | J= | 5  | K= | 8  | A= | 117.855 |
| I= | 4 | J= | 13 | K= | 14 | A= | 116.396 |
| I= | 4 | J= | 13 | K= | 15 | A= | 116.396 |
| I= | 5 | J= | 6  | K= | 12 | A= | 119.119 |

|    |   |    |   |    |    |    |    |    |         |
|----|---|----|---|----|----|----|----|----|---------|
| I= | 1 | J= | 2 | K= | 3  | L= | 4  | D= | 0.059   |
| I= | 1 | J= | 2 | K= | 3  | L= | 11 | D= | 179.520 |
| I= | 2 | J= | 3 | K= | 4  | L= | 5  | D= | 0.255   |
| I= | 2 | J= | 3 | K= | 4  | L= | 13 | D= | 176.668 |
| I= | 3 | J= | 4 | K= | 5  | L= | 6  | D= | 0.255   |
| I= | 3 | J= | 4 | K= | 5  | L= | 8  | D= | 179.219 |
| I= | 3 | J= | 4 | K= | 13 | L= | 14 | D= | 21.051  |
| I= | 3 | J= | 4 | K= | 13 | L= | 15 | D= | 162.178 |
| I= | 4 | J= | 5 | K= | 6  | L= | 12 | D= | 179.841 |

molA\_wb97xd

|    |   |    |    |    |          |
|----|---|----|----|----|----------|
| I= | 1 | J= | 2  | B= | 1.396920 |
| I= | 1 | J= | 6  | B= | 1.396920 |
| I= | 1 | J= | 9  | B= | 1.422831 |
| I= | 2 | J= | 3  | B= | 1.377760 |
| I= | 2 | J= | 7  | B= | 1.324233 |
| I= | 3 | J= | 4  | B= | 1.397621 |
| I= | 3 | J= | 11 | B= | 1.339169 |
| I= | 4 | J= | 5  | B= | 1.397621 |
| I= | 4 | J= | 13 | B= | 1.362499 |

|    |    |    |    |    |          |
|----|----|----|----|----|----------|
| I= | 5  | J= | 6  | B= | 1.377760 |
| I= | 5  | J= | 8  | B= | 1.339169 |
| I= | 6  | J= | 12 | B= | 1.324233 |
| I= | 9  | J= | 10 | B= | 1.150989 |
| I= | 13 | J= | 14 | B= | 1.005563 |
| I= | 13 | J= | 15 | B= | 1.005563 |

|    |   |    |    |    |    |    |         |
|----|---|----|----|----|----|----|---------|
| I= | 1 | J= | 2  | K= | 3  | A= | 121.067 |
| I= | 1 | J= | 2  | K= | 7  | A= | 119.785 |
| I= | 1 | J= | 6  | K= | 12 | A= | 119.785 |
| I= | 1 | J= | 9  | K= | 10 | A= | 179.979 |
| I= | 2 | J= | 3  | K= | 4  | A= | 121.684 |
| I= | 2 | J= | 3  | K= | 11 | A= | 120.242 |
| I= | 3 | J= | 4  | K= | 5  | A= | 116.924 |
| I= | 3 | J= | 4  | K= | 13 | A= | 121.523 |
| I= | 4 | J= | 5  | K= | 6  | A= | 121.684 |
| I= | 4 | J= | 5  | K= | 8  | A= | 118.073 |
| I= | 4 | J= | 13 | K= | 14 | A= | 118.319 |
| I= | 4 | J= | 13 | K= | 15 | A= | 118.319 |
| I= | 5 | J= | 6  | K= | 12 | A= | 119.148 |

|    |   |    |   |    |    |    |    |    |         |
|----|---|----|---|----|----|----|----|----|---------|
| I= | 1 | J= | 2 | K= | 3  | L= | 4  | D= | 0.001   |
| I= | 1 | J= | 2 | K= | 3  | L= | 11 | D= | 179.689 |
| I= | 2 | J= | 3 | K= | 4  | L= | 5  | D= | 0.215   |
| I= | 2 | J= | 3 | K= | 4  | L= | 13 | D= | 177.806 |
| I= | 3 | J= | 4 | K= | 5  | L= | 6  | D= | 0.215   |
| I= | 3 | J= | 4 | K= | 5  | L= | 8  | D= | 179.480 |
| I= | 3 | J= | 4 | K= | 13 | L= | 14 | D= | 15.446  |
| I= | 3 | J= | 4 | K= | 13 | L= | 15 | D= | 166.624 |
| I= | 4 | J= | 5 | K= | 6  | L= | 12 | D= | 179.950 |

molA\_x31yp

|    |    |    |    |    |          |
|----|----|----|----|----|----------|
| I= | 1  | J= | 2  | B= | 1.402033 |
| I= | 1  | J= | 6  | B= | 1.402033 |
| I= | 1  | J= | 9  | B= | 1.419688 |
| I= | 2  | J= | 3  | B= | 1.379244 |
| I= | 2  | J= | 7  | B= | 1.332334 |
| I= | 3  | J= | 4  | B= | 1.401214 |
| I= | 3  | J= | 11 | B= | 1.347037 |
| I= | 4  | J= | 5  | B= | 1.401214 |
| I= | 4  | J= | 13 | B= | 1.363931 |
| I= | 5  | J= | 6  | B= | 1.379244 |
| I= | 5  | J= | 8  | B= | 1.347037 |
| I= | 6  | J= | 12 | B= | 1.332334 |
| I= | 9  | J= | 10 | B= | 1.154260 |
| I= | 13 | J= | 14 | B= | 1.006793 |
| I= | 13 | J= | 15 | B= | 1.006793 |

|    |   |    |   |    |    |    |         |
|----|---|----|---|----|----|----|---------|
| I= | 1 | J= | 2 | K= | 3  | A= | 121.246 |
| I= | 1 | J= | 2 | K= | 7  | A= | 119.708 |
| I= | 1 | J= | 6 | K= | 12 | A= | 119.708 |
| I= | 1 | J= | 9 | K= | 10 | A= | 179.977 |
| I= | 2 | J= | 3 | K= | 4  | A= | 121.811 |
| I= | 2 | J= | 3 | K= | 11 | A= | 120.257 |
| I= | 3 | J= | 4 | K= | 5  | A= | 116.697 |

|    |   |    |    |    |    |    |         |
|----|---|----|----|----|----|----|---------|
| I= | 3 | J= | 4  | K= | 13 | A= | 121.639 |
| I= | 4 | J= | 5  | K= | 6  | A= | 121.811 |
| I= | 4 | J= | 5  | K= | 8  | A= | 117.932 |
| I= | 4 | J= | 13 | K= | 14 | A= | 118.568 |
| I= | 4 | J= | 13 | K= | 15 | A= | 118.568 |
| I= | 5 | J= | 6  | K= | 12 | A= | 119.046 |

|    |   |    |   |    |    |    |    |    |         |
|----|---|----|---|----|----|----|----|----|---------|
| I= | 1 | J= | 2 | K= | 3  | L= | 4  | D= | 0.072   |
| I= | 1 | J= | 2 | K= | 3  | L= | 11 | D= | 179.688 |
| I= | 2 | J= | 3 | K= | 4  | L= | 5  | D= | 0.315   |
| I= | 2 | J= | 3 | K= | 4  | L= | 13 | D= | 177.864 |
| I= | 3 | J= | 4 | K= | 5  | L= | 6  | D= | 0.315   |
| I= | 3 | J= | 4 | K= | 5  | L= | 8  | D= | 179.450 |
| I= | 3 | J= | 4 | K= | 13 | L= | 14 | D= | 14.519  |
| I= | 3 | J= | 4 | K= | 13 | L= | 15 | D= | 167.392 |
| I= | 4 | J= | 5 | K= | 6  | L= | 12 | D= | 179.973 |

molB\_apfd

|    |    |    |    |    |          |
|----|----|----|----|----|----------|
| I= | 1  | J= | 2  | B= | 1.399149 |
| I= | 1  | J= | 6  | B= | 1.401156 |
| I= | 1  | J= | 9  | B= | 1.416687 |
| I= | 2  | J= | 3  | B= | 1.377423 |
| I= | 2  | J= | 7  | B= | 1.333569 |
| I= | 3  | J= | 4  | B= | 1.401744 |
| I= | 3  | J= | 15 | B= | 1.083782 |
| I= | 4  | J= | 5  | B= | 1.401708 |
| I= | 4  | J= | 12 | B= | 1.363641 |
| I= | 5  | J= | 6  | B= | 1.378373 |
| I= | 5  | J= | 8  | B= | 1.343312 |
| I= | 6  | J= | 11 | B= | 1.326061 |
| I= | 9  | J= | 10 | B= | 1.155278 |
| I= | 12 | J= | 13 | B= | 1.005401 |
| I= | 12 | J= | 14 | B= | 1.006517 |

|    |   |    |    |    |    |    |         |
|----|---|----|----|----|----|----|---------|
| I= | 1 | J= | 2  | K= | 3  | A= | 122.947 |
| I= | 1 | J= | 2  | K= | 7  | A= | 118.200 |
| I= | 1 | J= | 6  | K= | 11 | A= | 119.712 |
| I= | 1 | J= | 9  | K= | 10 | A= | 179.967 |
| I= | 2 | J= | 3  | K= | 4  | A= | 119.710 |
| I= | 2 | J= | 3  | K= | 15 | A= | 119.278 |
| I= | 3 | J= | 4  | K= | 5  | A= | 118.091 |
| I= | 3 | J= | 4  | K= | 12 | A= | 122.512 |
| I= | 4 | J= | 5  | K= | 6  | A= | 121.354 |
| I= | 4 | J= | 5  | K= | 8  | A= | 118.641 |
| I= | 4 | J= | 12 | K= | 13 | A= | 118.809 |
| I= | 4 | J= | 12 | K= | 14 | A= | 118.416 |
| I= | 5 | J= | 6  | K= | 11 | A= | 119.094 |

|    |   |    |   |    |    |    |    |    |         |
|----|---|----|---|----|----|----|----|----|---------|
| I= | 1 | J= | 2 | K= | 3  | L= | 4  | D= | 0.024   |
| I= | 1 | J= | 2 | K= | 3  | L= | 15 | D= | 179.597 |
| I= | 2 | J= | 3 | K= | 4  | L= | 5  | D= | 0.089   |
| I= | 2 | J= | 3 | K= | 4  | L= | 12 | D= | 177.945 |
| I= | 3 | J= | 4 | K= | 5  | L= | 6  | D= | 0.110   |
| I= | 3 | J= | 4 | K= | 5  | L= | 8  | D= | 179.527 |
| I= | 3 | J= | 4 | K= | 12 | L= | 13 | D= | 17.285  |

|    |   |    |   |    |    |    |    |    |         |
|----|---|----|---|----|----|----|----|----|---------|
| I= | 3 | J= | 4 | K= | 12 | L= | 14 | D= | 167.700 |
| I= | 4 | J= | 5 | K= | 6  | L= | 11 | D= | 179.830 |

molB\_b3lypd

|    |    |    |    |    |          |
|----|----|----|----|----|----------|
| I= | 1  | J= | 2  | B= | 1.401102 |
| I= | 1  | J= | 6  | B= | 1.403390 |
| I= | 1  | J= | 9  | B= | 1.418337 |
| I= | 2  | J= | 3  | B= | 1.377752 |
| I= | 2  | J= | 7  | B= | 1.341459 |
| I= | 3  | J= | 4  | B= | 1.404330 |
| I= | 3  | J= | 15 | B= | 1.081938 |
| I= | 4  | J= | 5  | B= | 1.402863 |
| I= | 4  | J= | 12 | B= | 1.369088 |
| I= | 5  | J= | 6  | B= | 1.378125 |
| I= | 5  | J= | 8  | B= | 1.351081 |
| I= | 6  | J= | 11 | B= | 1.333339 |
| I= | 9  | J= | 10 | B= | 1.155134 |
| I= | 12 | J= | 13 | B= | 1.006374 |
| I= | 12 | J= | 14 | B= | 1.007413 |

|    |   |    |    |    |    |    |         |
|----|---|----|----|----|----|----|---------|
| I= | 1 | J= | 2  | K= | 3  | A= | 123.271 |
| I= | 1 | J= | 2  | K= | 7  | A= | 118.108 |
| I= | 1 | J= | 6  | K= | 11 | A= | 119.592 |
| I= | 1 | J= | 9  | K= | 10 | A= | 179.972 |
| I= | 2 | J= | 3  | K= | 4  | A= | 119.645 |
| I= | 2 | J= | 3  | K= | 15 | A= | 119.380 |
| I= | 3 | J= | 4  | K= | 5  | A= | 117.886 |
| I= | 3 | J= | 4  | K= | 12 | A= | 122.532 |
| I= | 4 | J= | 5  | K= | 6  | A= | 121.549 |
| I= | 4 | J= | 5  | K= | 8  | A= | 118.422 |
| I= | 4 | J= | 12 | K= | 13 | A= | 118.676 |
| I= | 4 | J= | 12 | K= | 14 | A= | 118.184 |
| I= | 5 | J= | 6  | K= | 11 | A= | 119.098 |

|    |   |    |   |    |    |    |    |    |         |
|----|---|----|---|----|----|----|----|----|---------|
| I= | 1 | J= | 2 | K= | 3  | L= | 4  | D= | 0.030   |
| I= | 1 | J= | 2 | K= | 3  | L= | 15 | D= | 179.580 |
| I= | 2 | J= | 3 | K= | 4  | L= | 5  | D= | 0.101   |
| I= | 2 | J= | 3 | K= | 4  | L= | 12 | D= | 177.891 |
| I= | 3 | J= | 4 | K= | 5  | L= | 6  | D= | 0.134   |
| I= | 3 | J= | 4 | K= | 5  | L= | 8  | D= | 179.484 |
| I= | 3 | J= | 4 | K= | 12 | L= | 13 | D= | 17.877  |
| I= | 3 | J= | 4 | K= | 12 | L= | 14 | D= | 167.540 |
| I= | 4 | J= | 5 | K= | 6  | L= | 11 | D= | 179.825 |

molB\_blyp

|    |   |    |    |    |          |
|----|---|----|----|----|----------|
| I= | 1 | J= | 2  | B= | 1.414689 |
| I= | 1 | J= | 6  | B= | 1.416632 |
| I= | 1 | J= | 9  | B= | 1.423606 |
| I= | 2 | J= | 3  | B= | 1.387876 |
| I= | 2 | J= | 7  | B= | 1.361227 |
| I= | 3 | J= | 4  | B= | 1.415850 |
| I= | 3 | J= | 15 | B= | 1.088768 |
| I= | 4 | J= | 5  | B= | 1.414399 |
| I= | 4 | J= | 12 | B= | 1.381616 |

|    |    |    |    |    |          |
|----|----|----|----|----|----------|
| I= | 5  | J= | 6  | B= | 1.389666 |
| I= | 5  | J= | 8  | B= | 1.369991 |
| I= | 6  | J= | 11 | B= | 1.352186 |
| I= | 9  | J= | 10 | B= | 1.168441 |
| I= | 12 | J= | 13 | B= | 1.014473 |
| I= | 12 | J= | 14 | B= | 1.015425 |

|    |   |    |    |    |    |    |         |
|----|---|----|----|----|----|----|---------|
| I= | 1 | J= | 2  | K= | 3  | A= | 123.557 |
| I= | 1 | J= | 2  | K= | 7  | A= | 118.025 |
| I= | 1 | J= | 6  | K= | 11 | A= | 119.535 |
| I= | 1 | J= | 9  | K= | 10 | A= | 179.967 |
| I= | 2 | J= | 3  | K= | 4  | A= | 119.718 |
| I= | 2 | J= | 3  | K= | 15 | A= | 119.342 |
| I= | 3 | J= | 4  | K= | 5  | A= | 117.678 |
| I= | 3 | J= | 4  | K= | 12 | A= | 122.530 |
| I= | 4 | J= | 5  | K= | 6  | A= | 121.684 |
| I= | 4 | J= | 5  | K= | 8  | A= | 118.398 |
| I= | 4 | J= | 12 | K= | 13 | A= | 118.419 |
| I= | 4 | J= | 12 | K= | 14 | A= | 117.928 |
| I= | 5 | J= | 6  | K= | 11 | A= | 118.990 |

|    |   |    |   |    |    |    |    |    |         |
|----|---|----|---|----|----|----|----|----|---------|
| I= | 1 | J= | 2 | K= | 3  | L= | 4  | D= | 0.038   |
| I= | 1 | J= | 2 | K= | 3  | L= | 15 | D= | 179.553 |
| I= | 2 | J= | 3 | K= | 4  | L= | 5  | D= | 0.111   |
| I= | 2 | J= | 3 | K= | 4  | L= | 12 | D= | 177.546 |
| I= | 3 | J= | 4 | K= | 5  | L= | 6  | D= | 0.148   |
| I= | 3 | J= | 4 | K= | 5  | L= | 8  | D= | 179.425 |
| I= | 3 | J= | 4 | K= | 12 | L= | 13 | D= | 19.229  |
| I= | 3 | J= | 4 | K= | 12 | L= | 14 | D= | 166.789 |
| I= | 4 | J= | 5 | K= | 6  | L= | 11 | D= | 179.788 |

molB\_camb3lypd

|    |    |    |    |    |          |
|----|----|----|----|----|----------|
| I= | 1  | J= | 2  | B= | 1.393602 |
| I= | 1  | J= | 6  | B= | 1.396211 |
| I= | 1  | J= | 9  | B= | 1.420681 |
| I= | 2  | J= | 3  | B= | 1.373356 |
| I= | 2  | J= | 7  | B= | 1.334799 |
| I= | 3  | J= | 4  | B= | 1.398588 |
| I= | 3  | J= | 15 | B= | 1.081544 |
| I= | 4  | J= | 5  | B= | 1.397193 |
| I= | 4  | J= | 12 | B= | 1.363253 |
| I= | 5  | J= | 6  | B= | 1.372557 |
| I= | 5  | J= | 8  | B= | 1.344943 |
| I= | 6  | J= | 11 | B= | 1.326796 |
| I= | 9  | J= | 10 | B= | 1.148332 |
| I= | 12 | J= | 13 | B= | 1.004984 |
| I= | 12 | J= | 14 | B= | 1.006220 |

|    |   |    |   |    |    |    |         |
|----|---|----|---|----|----|----|---------|
| I= | 1 | J= | 2 | K= | 3  | A= | 123.295 |
| I= | 1 | J= | 2 | K= | 7  | A= | 118.108 |
| I= | 1 | J= | 6 | K= | 11 | A= | 119.677 |
| I= | 1 | J= | 9 | K= | 10 | A= | 179.978 |
| I= | 2 | J= | 3 | K= | 4  | A= | 119.548 |
| I= | 2 | J= | 3 | K= | 15 | A= | 119.325 |
| I= | 3 | J= | 4 | K= | 5  | A= | 117.901 |



|    |   |    |    |    |    |    |         |
|----|---|----|----|----|----|----|---------|
| I= | 3 | J= | 4  | K= | 12 | A= | 122.715 |
| I= | 4 | J= | 5  | K= | 6  | A= | 121.558 |
| I= | 4 | J= | 5  | K= | 8  | A= | 118.392 |
| I= | 4 | J= | 12 | K= | 13 | A= | 119.410 |
| I= | 4 | J= | 12 | K= | 14 | A= | 118.774 |
| I= | 5 | J= | 6  | K= | 11 | A= | 119.050 |

|    |   |    |   |    |    |    |    |    |         |
|----|---|----|---|----|----|----|----|----|---------|
| I= | 1 | J= | 2 | K= | 3  | L= | 4  | D= | 0.025   |
| I= | 1 | J= | 2 | K= | 3  | L= | 15 | D= | 179.627 |
| I= | 2 | J= | 3 | K= | 4  | L= | 5  | D= | 0.082   |
| I= | 2 | J= | 3 | K= | 4  | L= | 12 | D= | 178.366 |
| I= | 3 | J= | 4 | K= | 5  | L= | 6  | D= | 0.112   |
| I= | 3 | J= | 4 | K= | 5  | L= | 8  | D= | 179.570 |
| I= | 3 | J= | 4 | K= | 12 | L= | 13 | D= | 14.881  |
| I= | 3 | J= | 4 | K= | 12 | L= | 14 | D= | 169.606 |
| I= | 4 | J= | 5 | K= | 6  | L= | 11 | D= | 179.873 |

molB\_m062x

|    |    |    |    |    |          |
|----|----|----|----|----|----------|
| I= | 1  | J= | 2  | B= | 1.395475 |
| I= | 1  | J= | 6  | B= | 1.397808 |
| I= | 1  | J= | 9  | B= | 1.424892 |
| I= | 2  | J= | 3  | B= | 1.376820 |
| I= | 2  | J= | 7  | B= | 1.330817 |
| I= | 3  | J= | 4  | B= | 1.400817 |
| I= | 3  | J= | 15 | B= | 1.082067 |
| I= | 4  | J= | 5  | B= | 1.399452 |
| I= | 4  | J= | 12 | B= | 1.367334 |
| I= | 5  | J= | 6  | B= | 1.375498 |
| I= | 5  | J= | 8  | B= | 1.340289 |
| I= | 6  | J= | 11 | B= | 1.323538 |
| I= | 9  | J= | 10 | B= | 1.149842 |
| I= | 12 | J= | 13 | B= | 1.006341 |
| I= | 12 | J= | 14 | B= | 1.007730 |

|    |   |    |    |    |    |    |         |
|----|---|----|----|----|----|----|---------|
| I= | 1 | J= | 2  | K= | 3  | A= | 123.124 |
| I= | 1 | J= | 2  | K= | 7  | A= | 118.099 |
| I= | 1 | J= | 6  | K= | 11 | A= | 119.766 |
| I= | 1 | J= | 9  | K= | 10 | A= | 179.972 |
| I= | 2 | J= | 3  | K= | 4  | A= | 119.458 |
| I= | 2 | J= | 3  | K= | 15 | A= | 119.354 |
| I= | 3 | J= | 4  | K= | 5  | A= | 118.100 |
| I= | 3 | J= | 4  | K= | 12 | A= | 122.717 |
| I= | 4 | J= | 5  | K= | 6  | A= | 121.463 |
| I= | 4 | J= | 5  | K= | 8  | A= | 118.470 |
| I= | 4 | J= | 12 | K= | 13 | A= | 118.360 |
| I= | 4 | J= | 12 | K= | 14 | A= | 117.886 |
| I= | 5 | J= | 6  | K= | 11 | A= | 119.096 |

|    |   |    |   |    |    |    |    |    |         |
|----|---|----|---|----|----|----|----|----|---------|
| I= | 1 | J= | 2 | K= | 3  | L= | 4  | D= | 0.062   |
| I= | 1 | J= | 2 | K= | 3  | L= | 15 | D= | 179.567 |
| I= | 2 | J= | 3 | K= | 4  | L= | 5  | D= | 0.021   |
| I= | 2 | J= | 3 | K= | 4  | L= | 12 | D= | 177.850 |
| I= | 3 | J= | 4 | K= | 5  | L= | 6  | D= | 0.039   |
| I= | 3 | J= | 4 | K= | 5  | L= | 8  | D= | 179.537 |
| I= | 3 | J= | 4 | K= | 12 | L= | 13 | D= | 18.692  |

|    |   |    |   |    |    |    |    |    |         |
|----|---|----|---|----|----|----|----|----|---------|
| I= | 3 | J= | 4 | K= | 12 | L= | 14 | D= | 166.869 |
| I= | 4 | J= | 5 | K= | 6  | L= | 11 | D= | 179.800 |

molB\_mp2

|    |    |    |    |    |          |
|----|----|----|----|----|----------|
| I= | 1  | J= | 2  | B= | 1.401627 |
| I= | 1  | J= | 6  | B= | 1.402614 |
| I= | 1  | J= | 9  | B= | 1.426338 |
| I= | 2  | J= | 3  | B= | 1.385721 |
| I= | 2  | J= | 7  | B= | 1.341225 |
| I= | 3  | J= | 4  | B= | 1.404472 |
| I= | 3  | J= | 15 | B= | 1.085414 |
| I= | 4  | J= | 5  | B= | 1.402555 |
| I= | 4  | J= | 12 | B= | 1.385914 |
| I= | 5  | J= | 6  | B= | 1.387187 |
| I= | 5  | J= | 8  | B= | 1.344095 |
| I= | 6  | J= | 11 | B= | 1.333740 |
| I= | 9  | J= | 10 | B= | 1.177650 |
| I= | 12 | J= | 13 | B= | 1.010266 |
| I= | 12 | J= | 14 | B= | 1.011022 |

|    |   |    |    |    |    |    |         |
|----|---|----|----|----|----|----|---------|
| I= | 1 | J= | 2  | K= | 3  | A= | 122.713 |
| I= | 1 | J= | 2  | K= | 7  | A= | 118.301 |
| I= | 1 | J= | 6  | K= | 11 | A= | 119.788 |
| I= | 1 | J= | 9  | K= | 10 | A= | 179.766 |
| I= | 2 | J= | 3  | K= | 4  | A= | 119.801 |
| I= | 2 | J= | 3  | K= | 15 | A= | 119.212 |
| I= | 3 | J= | 4  | K= | 5  | A= | 117.940 |
| I= | 3 | J= | 4  | K= | 12 | A= | 122.174 |
| I= | 4 | J= | 5  | K= | 6  | A= | 121.407 |
| I= | 4 | J= | 5  | K= | 8  | A= | 118.739 |
| I= | 4 | J= | 12 | K= | 13 | A= | 115.286 |
| I= | 4 | J= | 12 | K= | 14 | A= | 115.203 |
| I= | 5 | J= | 6  | K= | 11 | A= | 119.116 |

|    |   |    |   |    |    |    |    |    |         |
|----|---|----|---|----|----|----|----|----|---------|
| I= | 1 | J= | 2 | K= | 3  | L= | 4  | D= | 4.425   |
| I= | 1 | J= | 2 | K= | 3  | L= | 15 | D= | 178.702 |
| I= | 2 | J= | 3 | K= | 4  | L= | 5  | D= | 4.283   |
| I= | 2 | J= | 3 | K= | 4  | L= | 12 | D= | 177.686 |
| I= | 3 | J= | 4 | K= | 5  | L= | 6  | D= | 4.536   |
| I= | 3 | J= | 4 | K= | 5  | L= | 8  | D= | 179.674 |
| I= | 3 | J= | 4 | K= | 12 | L= | 13 | D= | 28.900  |
| I= | 3 | J= | 4 | K= | 12 | L= | 14 | D= | 163.226 |
| I= | 4 | J= | 5 | K= | 6  | L= | 11 | D= | 178.042 |

molB\_pbe0d

|    |   |    |    |    |          |
|----|---|----|----|----|----------|
| I= | 1 | J= | 2  | B= | 1.397380 |
| I= | 1 | J= | 6  | B= | 1.399647 |
| I= | 1 | J= | 9  | B= | 1.415720 |
| I= | 2 | J= | 3  | B= | 1.375297 |
| I= | 2 | J= | 7  | B= | 1.330138 |
| I= | 3 | J= | 4  | B= | 1.400490 |
| I= | 3 | J= | 15 | B= | 1.083172 |
| I= | 4 | J= | 5  | B= | 1.399736 |
| I= | 4 | J= | 12 | B= | 1.362798 |

|    |    |    |    |    |          |
|----|----|----|----|----|----------|
| I= | 5  | J= | 6  | B= | 1.375599 |
| I= | 5  | J= | 8  | B= | 1.340168 |
| I= | 6  | J= | 11 | B= | 1.322833 |
| I= | 9  | J= | 10 | B= | 1.154438 |
| I= | 12 | J= | 13 | B= | 1.005038 |
| I= | 12 | J= | 14 | B= | 1.006262 |

|    |   |    |    |    |    |    |         |
|----|---|----|----|----|----|----|---------|
| I= | 1 | J= | 2  | K= | 3  | A= | 123.091 |
| I= | 1 | J= | 2  | K= | 7  | A= | 118.171 |
| I= | 1 | J= | 6  | K= | 11 | A= | 119.667 |
| I= | 1 | J= | 9  | K= | 10 | A= | 179.969 |
| I= | 2 | J= | 3  | K= | 4  | A= | 119.680 |
| I= | 2 | J= | 3  | K= | 15 | A= | 119.285 |
| I= | 3 | J= | 4  | K= | 5  | A= | 117.978 |
| I= | 3 | J= | 4  | K= | 12 | A= | 122.620 |
| I= | 4 | J= | 5  | K= | 6  | A= | 121.470 |
| I= | 4 | J= | 5  | K= | 8  | A= | 118.475 |
| I= | 4 | J= | 12 | K= | 13 | A= | 118.647 |
| I= | 4 | J= | 12 | K= | 14 | A= | 118.081 |
| I= | 5 | J= | 6  | K= | 11 | A= | 119.101 |

|    |   |    |   |    |    |    |    |    |         |
|----|---|----|---|----|----|----|----|----|---------|
| I= | 1 | J= | 2 | K= | 3  | L= | 4  | D= | 0.032   |
| I= | 1 | J= | 2 | K= | 3  | L= | 15 | D= | 179.582 |
| I= | 2 | J= | 3 | K= | 4  | L= | 5  | D= | 0.085   |
| I= | 2 | J= | 3 | K= | 4  | L= | 12 | D= | 177.908 |
| I= | 3 | J= | 4 | K= | 5  | L= | 6  | D= | 0.108   |
| I= | 3 | J= | 4 | K= | 5  | L= | 8  | D= | 179.491 |
| I= | 3 | J= | 4 | K= | 12 | L= | 13 | D= | 17.925  |
| I= | 3 | J= | 4 | K= | 12 | L= | 14 | D= | 167.474 |
| I= | 4 | J= | 5 | K= | 6  | L= | 11 | D= | 179.815 |

molB\_pbe

|    |    |    |    |    |          |
|----|----|----|----|----|----------|
| I= | 1  | J= | 2  | B= | 1.410647 |
| I= | 1  | J= | 6  | B= | 1.412385 |
| I= | 1  | J= | 9  | B= | 1.418348 |
| I= | 2  | J= | 3  | B= | 1.384964 |
| I= | 2  | J= | 7  | B= | 1.349251 |
| I= | 3  | J= | 4  | B= | 1.411288 |
| I= | 3  | J= | 15 | B= | 1.090807 |
| I= | 4  | J= | 5  | B= | 1.410902 |
| I= | 4  | J= | 12 | B= | 1.373578 |
| I= | 5  | J= | 6  | B= | 1.386891 |
| I= | 5  | J= | 8  | B= | 1.358430 |
| I= | 6  | J= | 11 | B= | 1.341175 |
| I= | 9  | J= | 10 | B= | 1.169267 |
| I= | 12 | J= | 13 | B= | 1.013961 |
| I= | 12 | J= | 14 | B= | 1.015214 |

|    |   |    |   |    |    |    |         |
|----|---|----|---|----|----|----|---------|
| I= | 1 | J= | 2 | K= | 3  | A= | 123.341 |
| I= | 1 | J= | 2 | K= | 7  | A= | 118.044 |
| I= | 1 | J= | 6 | K= | 11 | A= | 119.610 |
| I= | 1 | J= | 9 | K= | 10 | A= | 179.963 |
| I= | 2 | J= | 3 | K= | 4  | A= | 119.749 |
| I= | 2 | J= | 3 | K= | 15 | A= | 119.271 |
| I= | 3 | J= | 4 | K= | 5  | A= | 117.808 |

|    |   |    |    |    |    |    |         |
|----|---|----|----|----|----|----|---------|
| I= | 3 | J= | 4  | K= | 12 | A= | 122.661 |
| I= | 4 | J= | 5  | K= | 6  | A= | 121.593 |
| I= | 4 | J= | 5  | K= | 8  | A= | 118.419 |
| I= | 4 | J= | 12 | K= | 13 | A= | 118.472 |
| I= | 4 | J= | 12 | K= | 14 | A= | 117.855 |
| I= | 5 | J= | 6  | K= | 11 | A= | 119.035 |

|    |   |    |   |    |    |    |    |    |         |
|----|---|----|---|----|----|----|----|----|---------|
| I= | 1 | J= | 2 | K= | 3  | L= | 4  | D= | 0.031   |
| I= | 1 | J= | 2 | K= | 3  | L= | 15 | D= | 179.564 |
| I= | 2 | J= | 3 | K= | 4  | L= | 5  | D= | 0.114   |
| I= | 2 | J= | 3 | K= | 4  | L= | 12 | D= | 177.612 |
| I= | 3 | J= | 4 | K= | 5  | L= | 6  | D= | 0.139   |
| I= | 3 | J= | 4 | K= | 5  | L= | 8  | D= | 179.413 |
| I= | 3 | J= | 4 | K= | 12 | L= | 13 | D= | 18.937  |
| I= | 3 | J= | 4 | K= | 12 | L= | 14 | D= | 166.971 |
| I= | 4 | J= | 5 | K= | 6  | L= | 11 | D= | 179.777 |

molB\_rtpss

|    |    |    |    |    |          |
|----|----|----|----|----|----------|
| I= | 1  | J= | 2  | B= | 1.407849 |
| I= | 1  | J= | 6  | B= | 1.409414 |
| I= | 1  | J= | 9  | B= | 1.418782 |
| I= | 2  | J= | 3  | B= | 1.383389 |
| I= | 2  | J= | 7  | B= | 1.350665 |
| I= | 3  | J= | 4  | B= | 1.409158 |
| I= | 3  | J= | 15 | B= | 1.086990 |
| I= | 4  | J= | 5  | B= | 1.406835 |
| I= | 4  | J= | 12 | B= | 1.379330 |
| I= | 5  | J= | 6  | B= | 1.383660 |
| I= | 5  | J= | 8  | B= | 1.359609 |
| I= | 6  | J= | 11 | B= | 1.342036 |
| I= | 9  | J= | 10 | B= | 1.167087 |
| I= | 12 | J= | 13 | B= | 1.014032 |
| I= | 12 | J= | 14 | B= | 1.015235 |

|    |   |    |    |    |    |    |         |
|----|---|----|----|----|----|----|---------|
| I= | 1 | J= | 2  | K= | 3  | A= | 123.612 |
| I= | 1 | J= | 2  | K= | 7  | A= | 117.859 |
| I= | 1 | J= | 6  | K= | 11 | A= | 119.592 |
| I= | 1 | J= | 9  | K= | 10 | A= | 179.971 |
| I= | 2 | J= | 3  | K= | 4  | A= | 119.417 |
| I= | 2 | J= | 3  | K= | 15 | A= | 119.511 |
| I= | 3 | J= | 4  | K= | 5  | A= | 117.931 |
| I= | 3 | J= | 4  | K= | 12 | A= | 122.625 |
| I= | 4 | J= | 5  | K= | 6  | A= | 121.683 |
| I= | 4 | J= | 5  | K= | 8  | A= | 118.350 |
| I= | 4 | J= | 12 | K= | 13 | A= | 116.968 |
| I= | 4 | J= | 12 | K= | 14 | A= | 116.278 |
| I= | 5 | J= | 6  | K= | 11 | A= | 119.079 |

|    |   |    |   |    |    |    |    |    |         |
|----|---|----|---|----|----|----|----|----|---------|
| I= | 1 | J= | 2 | K= | 3  | L= | 4  | D= | 0.104   |
| I= | 1 | J= | 2 | K= | 3  | L= | 15 | D= | 179.523 |
| I= | 2 | J= | 3 | K= | 4  | L= | 5  | D= | 0.035   |
| I= | 2 | J= | 3 | K= | 4  | L= | 12 | D= | 176.862 |
| I= | 3 | J= | 4 | K= | 5  | L= | 6  | D= | 0.060   |
| I= | 3 | J= | 4 | K= | 5  | L= | 8  | D= | 179.317 |
| I= | 3 | J= | 4 | K= | 12 | L= | 13 | D= | 23.815  |

|    |   |    |   |    |    |    |    |    |         |
|----|---|----|---|----|----|----|----|----|---------|
| I= | 3 | J= | 4 | K= | 12 | L= | 14 | D= | 164.057 |
| I= | 4 | J= | 5 | K= | 6  | L= | 11 | D= | 179.664 |

molB\_wb97xd

|    |    |    |    |    |          |
|----|----|----|----|----|----------|
| I= | 1  | J= | 2  | B= | 1.395932 |
| I= | 1  | J= | 6  | B= | 1.398525 |
| I= | 1  | J= | 9  | B= | 1.422513 |
| I= | 2  | J= | 3  | B= | 1.376026 |
| I= | 2  | J= | 7  | B= | 1.331698 |
| I= | 3  | J= | 4  | B= | 1.400133 |
| I= | 3  | J= | 15 | B= | 1.082317 |
| I= | 4  | J= | 5  | B= | 1.399405 |
| I= | 4  | J= | 12 | B= | 1.366412 |
| I= | 5  | J= | 6  | B= | 1.376242 |
| I= | 5  | J= | 8  | B= | 1.342100 |
| I= | 6  | J= | 11 | B= | 1.324037 |
| I= | 9  | J= | 10 | B= | 1.151236 |
| I= | 12 | J= | 13 | B= | 1.004831 |
| I= | 12 | J= | 14 | B= | 1.005957 |

|    |   |    |    |    |    |    |         |
|----|---|----|----|----|----|----|---------|
| I= | 1 | J= | 2  | K= | 3  | A= | 123.088 |
| I= | 1 | J= | 2  | K= | 7  | A= | 118.254 |
| I= | 1 | J= | 6  | K= | 11 | A= | 119.673 |
| I= | 1 | J= | 9  | K= | 10 | A= | 179.971 |
| I= | 2 | J= | 3  | K= | 4  | A= | 119.634 |
| I= | 2 | J= | 3  | K= | 15 | A= | 119.359 |
| I= | 3 | J= | 4  | K= | 5  | A= | 118.015 |
| I= | 3 | J= | 4  | K= | 12 | A= | 122.404 |
| I= | 4 | J= | 5  | K= | 6  | A= | 121.430 |
| I= | 4 | J= | 5  | K= | 8  | A= | 118.564 |
| I= | 4 | J= | 12 | K= | 13 | A= | 118.575 |
| I= | 4 | J= | 12 | K= | 14 | A= | 118.266 |
| I= | 5 | J= | 6  | K= | 11 | A= | 119.108 |

|    |   |    |   |    |    |    |    |    |         |
|----|---|----|---|----|----|----|----|----|---------|
| I= | 1 | J= | 2 | K= | 3  | L= | 4  | D= | 0.047   |
| I= | 1 | J= | 2 | K= | 3  | L= | 15 | D= | 179.561 |
| I= | 2 | J= | 3 | K= | 4  | L= | 5  | D= | 0.059   |
| I= | 2 | J= | 3 | K= | 4  | L= | 12 | D= | 177.970 |
| I= | 3 | J= | 4 | K= | 5  | L= | 6  | D= | 0.088   |
| I= | 3 | J= | 4 | K= | 5  | L= | 8  | D= | 179.531 |
| I= | 3 | J= | 4 | K= | 12 | L= | 13 | D= | 17.751  |
| I= | 3 | J= | 4 | K= | 12 | L= | 14 | D= | 167.434 |
| I= | 4 | J= | 5 | K= | 6  | L= | 11 | D= | 179.846 |

molB\_x31yp

|    |   |    |    |    |          |
|----|---|----|----|----|----------|
| I= | 1 | J= | 2  | B= | 1.400914 |
| I= | 1 | J= | 6  | B= | 1.403197 |
| I= | 1 | J= | 9  | B= | 1.419449 |
| I= | 2 | J= | 3  | B= | 1.377691 |
| I= | 2 | J= | 7  | B= | 1.340340 |
| I= | 3 | J= | 4  | B= | 1.404242 |
| I= | 3 | J= | 15 | B= | 1.082165 |
| I= | 4 | J= | 5  | B= | 1.402614 |
| I= | 4 | J= | 12 | B= | 1.368524 |

|    |    |    |    |    |          |
|----|----|----|----|----|----------|
| I= | 5  | J= | 6  | B= | 1.377859 |
| I= | 5  | J= | 8  | B= | 1.350026 |
| I= | 6  | J= | 11 | B= | 1.332257 |
| I= | 9  | J= | 10 | B= | 1.154482 |
| I= | 12 | J= | 13 | B= | 1.006169 |
| I= | 12 | J= | 14 | B= | 1.007232 |

|    |   |    |    |    |    |    |         |
|----|---|----|----|----|----|----|---------|
| I= | 1 | J= | 2  | K= | 3  | A= | 123.331 |
| I= | 1 | J= | 2  | K= | 7  | A= | 118.121 |
| I= | 1 | J= | 6  | K= | 11 | A= | 119.625 |
| I= | 1 | J= | 9  | K= | 10 | A= | 179.974 |
| I= | 2 | J= | 3  | K= | 4  | A= | 119.676 |
| I= | 2 | J= | 3  | K= | 15 | A= | 119.303 |
| I= | 3 | J= | 4  | K= | 5  | A= | 117.796 |
| I= | 3 | J= | 4  | K= | 12 | A= | 122.615 |
| I= | 4 | J= | 5  | K= | 6  | A= | 121.600 |
| I= | 4 | J= | 5  | K= | 8  | A= | 118.421 |
| I= | 4 | J= | 12 | K= | 13 | A= | 118.893 |
| I= | 4 | J= | 12 | K= | 14 | A= | 118.367 |
| I= | 5 | J= | 6  | K= | 11 | A= | 119.013 |

|    |   |    |   |    |    |    |    |    |         |
|----|---|----|---|----|----|----|----|----|---------|
| I= | 1 | J= | 2 | K= | 3  | L= | 4  | D= | 0.028   |
| I= | 1 | J= | 2 | K= | 3  | L= | 15 | D= | 179.591 |
| I= | 2 | J= | 3 | K= | 4  | L= | 5  | D= | 0.096   |
| I= | 2 | J= | 3 | K= | 4  | L= | 12 | D= | 177.950 |
| I= | 3 | J= | 4 | K= | 5  | L= | 6  | D= | 0.128   |
| I= | 3 | J= | 4 | K= | 5  | L= | 8  | D= | 179.513 |
| I= | 3 | J= | 4 | K= | 12 | L= | 13 | D= | 17.267  |
| I= | 3 | J= | 4 | K= | 12 | L= | 14 | D= | 167.983 |
| I= | 4 | J= | 5 | K= | 6  | L= | 11 | D= | 179.835 |

molC\_apfd

|    |    |    |    |    |          |
|----|----|----|----|----|----------|
| I= | 1  | J= | 2  | B= | 1.402557 |
| I= | 1  | J= | 6  | B= | 1.396111 |
| I= | 1  | J= | 8  | B= | 1.420346 |
| I= | 2  | J= | 3  | B= | 1.372204 |
| I= | 2  | J= | 15 | B= | 1.082974 |
| I= | 3  | J= | 4  | B= | 1.402612 |
| I= | 3  | J= | 14 | B= | 1.348222 |
| I= | 4  | J= | 5  | B= | 1.397234 |
| I= | 4  | J= | 11 | B= | 1.362205 |
| I= | 5  | J= | 6  | B= | 1.383352 |
| I= | 5  | J= | 7  | B= | 1.340490 |
| I= | 6  | J= | 10 | B= | 1.328328 |
| I= | 8  | J= | 9  | B= | 1.155485 |
| I= | 11 | J= | 12 | B= | 1.006339 |
| I= | 11 | J= | 13 | B= | 1.006353 |

|    |   |    |   |    |    |    |         |
|----|---|----|---|----|----|----|---------|
| I= | 1 | J= | 2 | K= | 3  | A= | 119.542 |
| I= | 1 | J= | 2 | K= | 15 | A= | 120.530 |
| I= | 1 | J= | 6 | K= | 10 | A= | 120.658 |
| I= | 1 | J= | 8 | K= | 9  | A= | 179.146 |
| I= | 2 | J= | 3 | K= | 4  | A= | 123.104 |
| I= | 2 | J= | 3 | K= | 14 | A= | 120.358 |
| I= | 3 | J= | 4 | K= | 5  | A= | 116.235 |

|    |   |    |    |    |    |    |         |
|----|---|----|----|----|----|----|---------|
| I= | 3 | J= | 4  | K= | 11 | A= | 122.078 |
| I= | 4 | J= | 5  | K= | 6  | A= | 121.935 |
| I= | 4 | J= | 5  | K= | 7  | A= | 118.087 |
| I= | 4 | J= | 11 | K= | 12 | A= | 117.887 |
| I= | 4 | J= | 11 | K= | 13 | A= | 118.201 |
| I= | 5 | J= | 6  | K= | 10 | A= | 118.884 |

|    |   |    |   |    |    |    |    |    |         |
|----|---|----|---|----|----|----|----|----|---------|
| I= | 1 | J= | 2 | K= | 3  | L= | 4  | D= | 0.066   |
| I= | 1 | J= | 2 | K= | 3  | L= | 14 | D= | 179.651 |
| I= | 2 | J= | 3 | K= | 4  | L= | 5  | D= | 0.309   |
| I= | 2 | J= | 3 | K= | 4  | L= | 11 | D= | 177.597 |
| I= | 3 | J= | 4 | K= | 5  | L= | 6  | D= | 0.307   |
| I= | 3 | J= | 4 | K= | 5  | L= | 7  | D= | 179.425 |
| I= | 3 | J= | 4 | K= | 11 | L= | 12 | D= | 16.452  |
| I= | 3 | J= | 4 | K= | 11 | L= | 13 | D= | 165.659 |
| I= | 4 | J= | 5 | K= | 6  | L= | 10 | D= | 179.961 |

molC\_b3lypd

|    |    |    |    |    |          |
|----|----|----|----|----|----------|
| I= | 1  | J= | 2  | B= | 1.406088 |
| I= | 1  | J= | 6  | B= | 1.398111 |
| I= | 1  | J= | 8  | B= | 1.421855 |
| I= | 2  | J= | 3  | B= | 1.372590 |
| I= | 2  | J= | 15 | B= | 1.081105 |
| I= | 3  | J= | 4  | B= | 1.403691 |
| I= | 3  | J= | 14 | B= | 1.356430 |
| I= | 4  | J= | 5  | B= | 1.398897 |
| I= | 4  | J= | 11 | B= | 1.367266 |
| I= | 5  | J= | 6  | B= | 1.382955 |
| I= | 5  | J= | 7  | B= | 1.348043 |
| I= | 6  | J= | 10 | B= | 1.335877 |
| I= | 8  | J= | 9  | B= | 1.155380 |
| I= | 11 | J= | 12 | B= | 1.007156 |
| I= | 11 | J= | 13 | B= | 1.007165 |

|    |   |    |    |    |    |    |         |
|----|---|----|----|----|----|----|---------|
| I= | 1 | J= | 2  | K= | 3  | A= | 119.536 |
| I= | 1 | J= | 2  | K= | 15 | A= | 120.533 |
| I= | 1 | J= | 6  | K= | 10 | A= | 120.449 |
| I= | 1 | J= | 8  | K= | 9  | A= | 178.981 |
| I= | 2 | J= | 3  | K= | 4  | A= | 123.387 |
| I= | 2 | J= | 3  | K= | 14 | A= | 120.162 |
| I= | 3 | J= | 4  | K= | 5  | A= | 115.953 |
| I= | 3 | J= | 4  | K= | 11 | A= | 122.196 |
| I= | 4 | J= | 5  | K= | 6  | A= | 122.018 |
| I= | 4 | J= | 5  | K= | 7  | A= | 117.954 |
| I= | 4 | J= | 11 | K= | 12 | A= | 117.787 |
| I= | 4 | J= | 11 | K= | 13 | A= | 118.116 |
| I= | 5 | J= | 6  | K= | 10 | A= | 118.843 |

|    |   |    |   |    |    |    |    |    |         |
|----|---|----|---|----|----|----|----|----|---------|
| I= | 1 | J= | 2 | K= | 3  | L= | 4  | D= | 0.094   |
| I= | 1 | J= | 2 | K= | 3  | L= | 14 | D= | 179.630 |
| I= | 2 | J= | 3 | K= | 4  | L= | 5  | D= | 0.360   |
| I= | 2 | J= | 3 | K= | 4  | L= | 11 | D= | 177.565 |
| I= | 3 | J= | 4 | K= | 5  | L= | 6  | D= | 0.357   |
| I= | 3 | J= | 4 | K= | 5  | L= | 7  | D= | 179.384 |
| I= | 3 | J= | 4 | K= | 11 | L= | 12 | D= | 16.464  |

|    |   |    |   |    |    |    |    |    |         |
|----|---|----|---|----|----|----|----|----|---------|
| I= | 3 | J= | 4 | K= | 11 | L= | 13 | D= | 165.587 |
| I= | 4 | J= | 5 | K= | 6  | L= | 10 | D= | 179.971 |

molC\_blyp

|    |    |    |    |    |          |
|----|----|----|----|----|----------|
| I= | 1  | J= | 2  | B= | 1.419311 |
| I= | 1  | J= | 6  | B= | 1.411655 |
| I= | 1  | J= | 8  | B= | 1.427113 |
| I= | 2  | J= | 3  | B= | 1.382781 |
| I= | 2  | J= | 15 | B= | 1.087675 |
| I= | 3  | J= | 4  | B= | 1.415579 |
| I= | 3  | J= | 14 | B= | 1.376559 |
| I= | 4  | J= | 5  | B= | 1.411203 |
| I= | 4  | J= | 11 | B= | 1.378725 |
| I= | 5  | J= | 6  | B= | 1.393980 |
| I= | 5  | J= | 7  | B= | 1.367085 |
| I= | 6  | J= | 10 | B= | 1.354578 |
| I= | 8  | J= | 9  | B= | 1.168675 |
| I= | 11 | J= | 12 | B= | 1.015072 |
| I= | 11 | J= | 13 | B= | 1.015064 |

|    |   |    |    |    |    |    |         |
|----|---|----|----|----|----|----|---------|
| I= | 1 | J= | 2  | K= | 3  | A= | 119.616 |
| I= | 1 | J= | 2  | K= | 15 | A= | 120.470 |
| I= | 1 | J= | 6  | K= | 10 | A= | 120.387 |
| I= | 1 | J= | 8  | K= | 9  | A= | 178.952 |
| I= | 2 | J= | 3  | K= | 4  | A= | 123.670 |
| I= | 2 | J= | 3  | K= | 14 | A= | 119.953 |
| I= | 3 | J= | 4  | K= | 5  | A= | 115.623 |
| I= | 3 | J= | 4  | K= | 11 | A= | 122.361 |
| I= | 4 | J= | 5  | K= | 6  | A= | 122.158 |
| I= | 4 | J= | 5  | K= | 7  | A= | 117.877 |
| I= | 4 | J= | 11 | K= | 12 | A= | 117.603 |
| I= | 4 | J= | 11 | K= | 13 | A= | 117.964 |
| I= | 5 | J= | 6  | K= | 10 | A= | 118.740 |

|    |   |    |   |    |    |    |    |    |         |
|----|---|----|---|----|----|----|----|----|---------|
| I= | 1 | J= | 2 | K= | 3  | L= | 4  | D= | 0.105   |
| I= | 1 | J= | 2 | K= | 3  | L= | 14 | D= | 179.607 |
| I= | 2 | J= | 3 | K= | 4  | L= | 5  | D= | 0.401   |
| I= | 2 | J= | 3 | K= | 4  | L= | 11 | D= | 177.252 |
| I= | 3 | J= | 4 | K= | 5  | L= | 6  | D= | 0.403   |
| I= | 3 | J= | 4 | K= | 5  | L= | 7  | D= | 179.328 |
| I= | 3 | J= | 4 | K= | 11 | L= | 12 | D= | 17.310  |
| I= | 3 | J= | 4 | K= | 11 | L= | 13 | D= | 165.036 |
| I= | 4 | J= | 5 | K= | 6  | L= | 10 | D= | 179.965 |

molC\_camb3lypd

|    |   |    |    |    |          |
|----|---|----|----|----|----------|
| I= | 1 | J= | 2  | B= | 1.399218 |
| I= | 1 | J= | 6  | B= | 1.390375 |
| I= | 1 | J= | 8  | B= | 1.424492 |
| I= | 2 | J= | 3  | B= | 1.367652 |
| I= | 2 | J= | 15 | B= | 1.081013 |
| I= | 3 | J= | 4  | B= | 1.397799 |
| I= | 3 | J= | 14 | B= | 1.349898 |
| I= | 4 | J= | 5  | B= | 1.391941 |
| I= | 4 | J= | 11 | B= | 1.362216 |



|    |    |    |    |    |          |
|----|----|----|----|----|----------|
| I= | 5  | J= | 6  | B= | 1.378250 |
| I= | 5  | J= | 7  | B= | 1.341725 |
| I= | 6  | J= | 10 | B= | 1.329506 |
| I= | 8  | J= | 9  | B= | 1.148553 |
| I= | 11 | J= | 12 | B= | 1.006030 |
| I= | 11 | J= | 13 | B= | 1.006042 |

|    |   |    |    |    |    |    |         |
|----|---|----|----|----|----|----|---------|
| I= | 1 | J= | 2  | K= | 3  | A= | 119.474 |
| I= | 1 | J= | 2  | K= | 15 | A= | 120.698 |
| I= | 1 | J= | 6  | K= | 10 | A= | 120.532 |
| I= | 1 | J= | 8  | K= | 9  | A= | 178.983 |
| I= | 2 | J= | 3  | K= | 4  | A= | 123.371 |
| I= | 2 | J= | 3  | K= | 14 | A= | 120.247 |
| I= | 3 | J= | 4  | K= | 5  | A= | 115.976 |
| I= | 3 | J= | 4  | K= | 11 | A= | 122.165 |
| I= | 4 | J= | 5  | K= | 6  | A= | 121.983 |
| I= | 4 | J= | 5  | K= | 7  | A= | 118.007 |
| I= | 4 | J= | 11 | K= | 12 | A= | 118.308 |
| I= | 4 | J= | 11 | K= | 13 | A= | 118.626 |
| I= | 5 | J= | 6  | K= | 10 | A= | 118.766 |

|    |   |    |   |    |    |    |    |    |         |
|----|---|----|---|----|----|----|----|----|---------|
| I= | 1 | J= | 2 | K= | 3  | L= | 4  | D= | 0.082   |
| I= | 1 | J= | 2 | K= | 3  | L= | 14 | D= | 179.672 |
| I= | 2 | J= | 3 | K= | 4  | L= | 5  | D= | 0.309   |
| I= | 2 | J= | 3 | K= | 4  | L= | 11 | D= | 177.988 |
| I= | 3 | J= | 4 | K= | 5  | L= | 6  | D= | 0.305   |
| I= | 3 | J= | 4 | K= | 5  | L= | 7  | D= | 179.470 |
| I= | 3 | J= | 4 | K= | 11 | L= | 12 | D= | 14.325  |
| I= | 3 | J= | 4 | K= | 11 | L= | 13 | D= | 167.326 |
| I= | 4 | J= | 5 | K= | 6  | L= | 10 | D= | 179.988 |

molC\_m062x

|    |    |    |    |    |          |
|----|----|----|----|----|----------|
| I= | 1  | J= | 2  | B= | 1.401186 |
| I= | 1  | J= | 6  | B= | 1.392032 |
| I= | 1  | J= | 8  | B= | 1.428974 |
| I= | 2  | J= | 3  | B= | 1.371124 |
| I= | 2  | J= | 15 | B= | 1.081664 |
| I= | 3  | J= | 4  | B= | 1.400377 |
| I= | 3  | J= | 14 | B= | 1.344596 |
| I= | 4  | J= | 5  | B= | 1.393697 |
| I= | 4  | J= | 11 | B= | 1.366914 |
| I= | 5  | J= | 6  | B= | 1.381425 |
| I= | 5  | J= | 7  | B= | 1.337158 |
| I= | 6  | J= | 10 | B= | 1.326132 |
| I= | 8  | J= | 9  | B= | 1.150046 |
| I= | 11 | J= | 12 | B= | 1.007686 |
| I= | 11 | J= | 13 | B= | 1.007699 |

|    |   |    |   |    |    |    |         |
|----|---|----|---|----|----|----|---------|
| I= | 1 | J= | 2 | K= | 3  | A= | 119.291 |
| I= | 1 | J= | 2 | K= | 15 | A= | 120.806 |
| I= | 1 | J= | 6 | K= | 10 | A= | 120.650 |
| I= | 1 | J= | 8 | K= | 9  | A= | 179.074 |
| I= | 2 | J= | 3 | K= | 4  | A= | 123.271 |
| I= | 2 | J= | 3 | K= | 14 | A= | 120.412 |
| I= | 3 | J= | 4 | K= | 5  | A= | 116.195 |

|    |   |    |    |    |    |    |         |
|----|---|----|----|----|----|----|---------|
| I= | 3 | J= | 4  | K= | 11 | A= | 122.047 |
| I= | 4 | J= | 5  | K= | 6  | A= | 121.880 |
| I= | 4 | J= | 5  | K= | 7  | A= | 118.085 |
| I= | 4 | J= | 11 | K= | 12 | A= | 117.245 |
| I= | 4 | J= | 11 | K= | 13 | A= | 117.554 |
| I= | 5 | J= | 6  | K= | 10 | A= | 118.787 |

|    |   |    |   |    |    |    |    |    |         |
|----|---|----|---|----|----|----|----|----|---------|
| I= | 1 | J= | 2 | K= | 3  | L= | 4  | D= | 0.030   |
| I= | 1 | J= | 2 | K= | 3  | L= | 14 | D= | 179.628 |
| I= | 2 | J= | 3 | K= | 4  | L= | 5  | D= | 0.245   |
| I= | 2 | J= | 3 | K= | 4  | L= | 11 | D= | 177.439 |
| I= | 3 | J= | 4 | K= | 5  | L= | 6  | D= | 0.238   |
| I= | 3 | J= | 4 | K= | 5  | L= | 7  | D= | 179.434 |
| I= | 3 | J= | 4 | K= | 11 | L= | 12 | D= | 18.051  |
| I= | 3 | J= | 4 | K= | 11 | L= | 13 | D= | 164.292 |
| I= | 4 | J= | 5 | K= | 6  | L= | 10 | D= | 179.928 |

molC\_mp2

|    |    |    |    |    |          |
|----|----|----|----|----|----------|
| I= | 1  | J= | 2  | B= | 1.407935 |
| I= | 1  | J= | 6  | B= | 1.399014 |
| I= | 1  | J= | 8  | B= | 1.429808 |
| I= | 2  | J= | 3  | B= | 1.382873 |
| I= | 2  | J= | 15 | B= | 1.084391 |
| I= | 3  | J= | 4  | B= | 1.404284 |
| I= | 3  | J= | 14 | B= | 1.348905 |
| I= | 4  | J= | 5  | B= | 1.399610 |
| I= | 4  | J= | 11 | B= | 1.383501 |
| I= | 5  | J= | 6  | B= | 1.391195 |
| I= | 5  | J= | 7  | B= | 1.341581 |
| I= | 6  | J= | 10 | B= | 1.335796 |
| I= | 8  | J= | 9  | B= | 1.177886 |
| I= | 11 | J= | 12 | B= | 1.010883 |
| I= | 11 | J= | 13 | B= | 1.010936 |

|    |   |    |    |    |    |    |         |
|----|---|----|----|----|----|----|---------|
| I= | 1 | J= | 2  | K= | 3  | A= | 119.104 |
| I= | 1 | J= | 2  | K= | 15 | A= | 120.850 |
| I= | 1 | J= | 6  | K= | 10 | A= | 120.737 |
| I= | 1 | J= | 8  | K= | 9  | A= | 179.189 |
| I= | 2 | J= | 3  | K= | 4  | A= | 123.339 |
| I= | 2 | J= | 3  | K= | 14 | A= | 119.943 |
| I= | 3 | J= | 4  | K= | 5  | A= | 116.083 |
| I= | 3 | J= | 4  | K= | 11 | A= | 122.029 |
| I= | 4 | J= | 5  | K= | 6  | A= | 122.057 |
| I= | 4 | J= | 5  | K= | 7  | A= | 118.120 |
| I= | 4 | J= | 11 | K= | 12 | A= | 114.834 |
| I= | 4 | J= | 11 | K= | 13 | A= | 115.101 |
| I= | 5 | J= | 6  | K= | 10 | A= | 118.918 |

|    |   |    |   |    |    |    |    |    |         |
|----|---|----|---|----|----|----|----|----|---------|
| I= | 1 | J= | 2 | K= | 3  | L= | 4  | D= | 3.704   |
| I= | 1 | J= | 2 | K= | 3  | L= | 14 | D= | 179.565 |
| I= | 2 | J= | 3 | K= | 4  | L= | 5  | D= | 3.699   |
| I= | 2 | J= | 3 | K= | 4  | L= | 11 | D= | 177.122 |
| I= | 3 | J= | 4 | K= | 5  | L= | 6  | D= | 3.917   |
| I= | 3 | J= | 4 | K= | 5  | L= | 7  | D= | 179.710 |
| I= | 3 | J= | 4 | K= | 11 | L= | 12 | D= | 26.009  |

|    |   |    |   |    |    |    |    |    |         |
|----|---|----|---|----|----|----|----|----|---------|
| I= | 3 | J= | 4 | K= | 11 | L= | 13 | D= | 160.640 |
| I= | 4 | J= | 5 | K= | 6  | L= | 10 | D= | 178.491 |

molC\_pbe0d

|    |    |    |    |    |          |
|----|----|----|----|----|----------|
| I= | 1  | J= | 2  | B= | 1.401664 |
| I= | 1  | J= | 6  | B= | 1.394281 |
| I= | 1  | J= | 8  | B= | 1.419394 |
| I= | 2  | J= | 3  | B= | 1.370019 |
| I= | 2  | J= | 15 | B= | 1.082452 |
| I= | 3  | J= | 4  | B= | 1.400567 |
| I= | 3  | J= | 14 | B= | 1.344697 |
| I= | 4  | J= | 5  | B= | 1.395276 |
| I= | 4  | J= | 11 | B= | 1.361758 |
| I= | 5  | J= | 6  | B= | 1.380714 |
| I= | 5  | J= | 7  | B= | 1.337164 |
| I= | 6  | J= | 10 | B= | 1.325285 |
| I= | 8  | J= | 9  | B= | 1.154641 |
| I= | 11 | J= | 12 | B= | 1.006109 |
| I= | 11 | J= | 13 | B= | 1.006102 |

|    |   |    |    |    |    |    |         |
|----|---|----|----|----|----|----|---------|
| I= | 1 | J= | 2  | K= | 3  | A= | 119.534 |
| I= | 1 | J= | 2  | K= | 15 | A= | 120.566 |
| I= | 1 | J= | 6  | K= | 10 | A= | 120.580 |
| I= | 1 | J= | 8  | K= | 9  | A= | 179.061 |
| I= | 2 | J= | 3  | K= | 4  | A= | 123.231 |
| I= | 2 | J= | 3  | K= | 14 | A= | 120.305 |
| I= | 3 | J= | 4  | K= | 5  | A= | 116.103 |
| I= | 3 | J= | 4  | K= | 11 | A= | 122.114 |
| I= | 4 | J= | 5  | K= | 6  | A= | 121.982 |
| I= | 4 | J= | 5  | K= | 7  | A= | 118.007 |
| I= | 4 | J= | 11 | K= | 12 | A= | 117.595 |
| I= | 4 | J= | 11 | K= | 13 | A= | 117.939 |
| I= | 5 | J= | 6  | K= | 10 | A= | 118.850 |

|    |   |    |   |    |    |    |    |    |         |
|----|---|----|---|----|----|----|----|----|---------|
| I= | 1 | J= | 2 | K= | 3  | L= | 4  | D= | 0.065   |
| I= | 1 | J= | 2 | K= | 3  | L= | 14 | D= | 179.623 |
| I= | 2 | J= | 3 | K= | 4  | L= | 5  | D= | 0.318   |
| I= | 2 | J= | 3 | K= | 4  | L= | 11 | D= | 177.544 |
| I= | 3 | J= | 4 | K= | 5  | L= | 6  | D= | 0.315   |
| I= | 3 | J= | 4 | K= | 5  | L= | 7  | D= | 179.390 |
| I= | 3 | J= | 4 | K= | 11 | L= | 12 | D= | 16.935  |
| I= | 3 | J= | 4 | K= | 11 | L= | 13 | D= | 165.161 |
| I= | 4 | J= | 5 | K= | 6  | L= | 10 | D= | 179.955 |

molC\_pbe

|    |   |    |    |    |          |
|----|---|----|----|----|----------|
| I= | 1 | J= | 2  | B= | 1.414261 |
| I= | 1 | J= | 6  | B= | 1.407631 |
| I= | 1 | J= | 8  | B= | 1.421967 |
| I= | 2 | J= | 3  | B= | 1.379772 |
| I= | 2 | J= | 15 | B= | 1.089778 |
| I= | 3 | J= | 4  | B= | 1.412052 |
| I= | 3 | J= | 14 | B= | 1.364133 |
| I= | 4 | J= | 5  | B= | 1.407195 |
| I= | 4 | J= | 11 | B= | 1.371293 |

|    |    |    |    |    |          |
|----|----|----|----|----|----------|
| I= | 5  | J= | 6  | B= | 1.391359 |
| I= | 5  | J= | 7  | B= | 1.355618 |
| I= | 6  | J= | 10 | B= | 1.343406 |
| I= | 8  | J= | 9  | B= | 1.169449 |
| I= | 11 | J= | 12 | B= | 1.014927 |
| I= | 11 | J= | 13 | B= | 1.014889 |

|    |   |    |    |    |    |    |         |
|----|---|----|----|----|----|----|---------|
| I= | 1 | J= | 2  | K= | 3  | A= | 119.596 |
| I= | 1 | J= | 2  | K= | 15 | A= | 120.464 |
| I= | 1 | J= | 6  | K= | 10 | A= | 120.504 |
| I= | 1 | J= | 8  | K= | 9  | A= | 179.088 |
| I= | 2 | J= | 3  | K= | 4  | A= | 123.487 |
| I= | 2 | J= | 3  | K= | 14 | A= | 120.190 |
| I= | 3 | J= | 4  | K= | 5  | A= | 115.829 |
| I= | 3 | J= | 4  | K= | 11 | A= | 122.248 |
| I= | 4 | J= | 5  | K= | 6  | A= | 122.089 |
| I= | 4 | J= | 5  | K= | 7  | A= | 117.903 |
| I= | 4 | J= | 11 | K= | 12 | A= | 117.480 |
| I= | 4 | J= | 11 | K= | 13 | A= | 117.874 |
| I= | 5 | J= | 6  | K= | 10 | A= | 118.786 |

|    |   |    |   |    |    |    |    |    |         |
|----|---|----|---|----|----|----|----|----|---------|
| I= | 1 | J= | 2 | K= | 3  | L= | 4  | D= | 0.089   |
| I= | 1 | J= | 2 | K= | 3  | L= | 14 | D= | 179.592 |
| I= | 2 | J= | 3 | K= | 4  | L= | 5  | D= | 0.388   |
| I= | 2 | J= | 3 | K= | 4  | L= | 11 | D= | 177.301 |
| I= | 3 | J= | 4 | K= | 5  | L= | 6  | D= | 0.388   |
| I= | 3 | J= | 4 | K= | 5  | L= | 7  | D= | 179.312 |
| I= | 3 | J= | 4 | K= | 11 | L= | 12 | D= | 17.329  |
| I= | 3 | J= | 4 | K= | 11 | L= | 13 | D= | 164.946 |
| I= | 4 | J= | 5 | K= | 6  | L= | 10 | D= | 179.957 |

molC\_rtpss

|    |    |    |    |    |          |
|----|----|----|----|----|----------|
| I= | 1  | J= | 2  | B= | 1.413016 |
| I= | 1  | J= | 6  | B= | 1.404810 |
| I= | 1  | J= | 8  | B= | 1.422646 |
| I= | 2  | J= | 3  | B= | 1.378511 |
| I= | 2  | J= | 15 | B= | 1.085667 |
| I= | 3  | J= | 4  | B= | 1.408006 |
| I= | 3  | J= | 14 | B= | 1.365658 |
| I= | 4  | J= | 5  | B= | 1.403121 |
| I= | 4  | J= | 11 | B= | 1.376762 |
| I= | 5  | J= | 6  | B= | 1.388043 |
| I= | 5  | J= | 7  | B= | 1.356583 |
| I= | 6  | J= | 10 | B= | 1.344403 |
| I= | 8  | J= | 9  | B= | 1.167309 |
| I= | 11 | J= | 12 | B= | 1.014985 |
| I= | 11 | J= | 13 | B= | 1.014951 |

|    |   |    |   |    |    |    |         |
|----|---|----|---|----|----|----|---------|
| I= | 1 | J= | 2 | K= | 3  | A= | 119.280 |
| I= | 1 | J= | 2 | K= | 15 | A= | 120.546 |
| I= | 1 | J= | 6 | K= | 10 | A= | 120.428 |
| I= | 1 | J= | 8 | K= | 9  | A= | 179.043 |
| I= | 2 | J= | 3 | K= | 4  | A= | 123.730 |
| I= | 2 | J= | 3 | K= | 14 | A= | 120.104 |
| I= | 3 | J= | 4 | K= | 5  | A= | 115.790 |

|    |   |    |    |    |    |    |         |
|----|---|----|----|----|----|----|---------|
| I= | 3 | J= | 4  | K= | 11 | A= | 122.229 |
| I= | 4 | J= | 5  | K= | 6  | A= | 122.078 |
| I= | 4 | J= | 5  | K= | 7  | A= | 117.911 |
| I= | 4 | J= | 11 | K= | 12 | A= | 115.941 |
| I= | 4 | J= | 11 | K= | 13 | A= | 116.313 |
| I= | 5 | J= | 6  | K= | 10 | A= | 118.795 |

|    |   |    |   |    |    |    |    |    |         |
|----|---|----|---|----|----|----|----|----|---------|
| I= | 1 | J= | 2 | K= | 3  | L= | 4  | D= | 0.000   |
| I= | 1 | J= | 2 | K= | 3  | L= | 14 | D= | 179.513 |
| I= | 2 | J= | 3 | K= | 4  | L= | 5  | D= | 0.304   |
| I= | 2 | J= | 3 | K= | 4  | L= | 11 | D= | 176.525 |
| I= | 3 | J= | 4 | K= | 5  | L= | 6  | D= | 0.306   |
| I= | 3 | J= | 4 | K= | 5  | L= | 7  | D= | 179.222 |
| I= | 3 | J= | 4 | K= | 11 | L= | 12 | D= | 21.587  |
| I= | 3 | J= | 4 | K= | 11 | L= | 13 | D= | 161.579 |
| I= | 4 | J= | 5 | K= | 6  | L= | 10 | D= | 179.862 |

molC\_wb97xd

|    |    |    |    |    |          |
|----|----|----|----|----|----------|
| I= | 1  | J= | 2  | B= | 1.400386 |
| I= | 1  | J= | 6  | B= | 1.392496 |
| I= | 1  | J= | 8  | B= | 1.426466 |
| I= | 2  | J= | 3  | B= | 1.370505 |
| I= | 2  | J= | 15 | B= | 1.081755 |
| I= | 3  | J= | 4  | B= | 1.400305 |
| I= | 3  | J= | 14 | B= | 1.346731 |
| I= | 4  | J= | 5  | B= | 1.394535 |
| I= | 4  | J= | 11 | B= | 1.365788 |
| I= | 5  | J= | 6  | B= | 1.381860 |
| I= | 5  | J= | 7  | B= | 1.338944 |
| I= | 6  | J= | 10 | B= | 1.326667 |
| I= | 8  | J= | 9  | B= | 1.151458 |
| I= | 11 | J= | 12 | B= | 1.005830 |
| I= | 11 | J= | 13 | B= | 1.005827 |

|    |   |    |    |    |    |    |         |
|----|---|----|----|----|----|----|---------|
| I= | 1 | J= | 2  | K= | 3  | A= | 119.478 |
| I= | 1 | J= | 2  | K= | 15 | A= | 120.653 |
| I= | 1 | J= | 6  | K= | 10 | A= | 120.588 |
| I= | 1 | J= | 8  | K= | 9  | A= | 178.960 |
| I= | 2 | J= | 3  | K= | 4  | A= | 123.264 |
| I= | 2 | J= | 3  | K= | 14 | A= | 120.123 |
| I= | 3 | J= | 4  | K= | 5  | A= | 116.072 |
| I= | 3 | J= | 4  | K= | 11 | A= | 122.123 |
| I= | 4 | J= | 5  | K= | 6  | A= | 121.966 |
| I= | 4 | J= | 5  | K= | 7  | A= | 118.109 |
| I= | 4 | J= | 11 | K= | 12 | A= | 117.655 |
| I= | 4 | J= | 11 | K= | 13 | A= | 117.974 |
| I= | 5 | J= | 6  | K= | 10 | A= | 118.857 |

|    |   |    |   |    |    |    |    |    |         |
|----|---|----|---|----|----|----|----|----|---------|
| I= | 1 | J= | 2 | K= | 3  | L= | 4  | D= | 0.036   |
| I= | 1 | J= | 2 | K= | 3  | L= | 14 | D= | 179.647 |
| I= | 2 | J= | 3 | K= | 4  | L= | 5  | D= | 0.260   |
| I= | 2 | J= | 3 | K= | 4  | L= | 11 | D= | 177.549 |
| I= | 3 | J= | 4 | K= | 5  | L= | 6  | D= | 0.256   |
| I= | 3 | J= | 4 | K= | 5  | L= | 7  | D= | 179.445 |
| I= | 3 | J= | 4 | K= | 11 | L= | 12 | D= | 17.029  |

|    |   |    |   |    |    |    |    |    |         |
|----|---|----|---|----|----|----|----|----|---------|
| I= | 3 | J= | 4 | K= | 11 | L= | 13 | D= | 165.109 |
| I= | 4 | J= | 5 | K= | 6  | L= | 10 | D= | 179.959 |

molC\_x31yp

|    |    |    |    |    |          |
|----|----|----|----|----|----------|
| I= | 1  | J= | 2  | B= | 1.406021 |
| I= | 1  | J= | 6  | B= | 1.397831 |
| I= | 1  | J= | 8  | B= | 1.422987 |
| I= | 2  | J= | 3  | B= | 1.372466 |
| I= | 2  | J= | 15 | B= | 1.081357 |
| I= | 3  | J= | 4  | B= | 1.403454 |
| I= | 3  | J= | 14 | B= | 1.355301 |
| I= | 4  | J= | 5  | B= | 1.398535 |
| I= | 4  | J= | 11 | B= | 1.366836 |
| I= | 5  | J= | 6  | B= | 1.382788 |
| I= | 5  | J= | 7  | B= | 1.346962 |
| I= | 6  | J= | 10 | B= | 1.334818 |
| I= | 8  | J= | 9  | B= | 1.154720 |
| I= | 11 | J= | 12 | B= | 1.006992 |
| I= | 11 | J= | 13 | B= | 1.007003 |

|    |   |    |    |    |    |    |         |
|----|---|----|----|----|----|----|---------|
| I= | 1 | J= | 2  | K= | 3  | A= | 119.582 |
| I= | 1 | J= | 2  | K= | 15 | A= | 120.589 |
| I= | 1 | J= | 6  | K= | 10 | A= | 120.487 |
| I= | 1 | J= | 8  | K= | 9  | A= | 178.981 |
| I= | 2 | J= | 3  | K= | 4  | A= | 123.429 |
| I= | 2 | J= | 3  | K= | 14 | A= | 120.131 |
| I= | 3 | J= | 4  | K= | 5  | A= | 115.866 |
| I= | 3 | J= | 4  | K= | 11 | A= | 122.238 |
| I= | 4 | J= | 5  | K= | 6  | A= | 122.066 |
| I= | 4 | J= | 5  | K= | 7  | A= | 117.961 |
| I= | 4 | J= | 11 | K= | 12 | A= | 117.965 |
| I= | 4 | J= | 11 | K= | 13 | A= | 118.292 |
| I= | 5 | J= | 6  | K= | 10 | A= | 118.753 |

|    |   |    |   |    |    |    |    |    |         |
|----|---|----|---|----|----|----|----|----|---------|
| I= | 1 | J= | 2 | K= | 3  | L= | 4  | D= | 0.093   |
| I= | 1 | J= | 2 | K= | 3  | L= | 14 | D= | 179.649 |
| I= | 2 | J= | 3 | K= | 4  | L= | 5  | D= | 0.347   |
| I= | 2 | J= | 3 | K= | 4  | L= | 11 | D= | 177.620 |
| I= | 3 | J= | 4 | K= | 5  | L= | 6  | D= | 0.344   |
| I= | 3 | J= | 4 | K= | 5  | L= | 7  | D= | 179.415 |
| I= | 3 | J= | 4 | K= | 11 | L= | 12 | D= | 16.005  |
| I= | 3 | J= | 4 | K= | 11 | L= | 13 | D= | 166.007 |
| I= | 4 | J= | 5 | K= | 6  | L= | 10 | D= | 179.975 |

molD\_apfd

|    |   |    |    |    |          |
|----|---|----|----|----|----------|
| I= | 1 | J= | 2  | B= | 1.398281 |
| I= | 1 | J= | 6  | B= | 1.410742 |
| I= | 1 | J= | 11 | B= | 1.417375 |
| I= | 2 | J= | 3  | B= | 1.380610 |
| I= | 2 | J= | 8  | B= | 1.327690 |
| I= | 3 | J= | 4  | B= | 1.397469 |
| I= | 3 | J= | 15 | B= | 1.329980 |
| I= | 4 | J= | 5  | B= | 1.384199 |
| I= | 4 | J= | 10 | B= | 1.711002 |

|    |    |    |    |    |          |
|----|----|----|----|----|----------|
| I= | 5  | J= | 6  | B= | 1.398805 |
| I= | 5  | J= | 9  | B= | 1.340636 |
| I= | 6  | J= | 7  | B= | 1.360604 |
| I= | 7  | J= | 13 | B= | 1.005800 |
| I= | 7  | J= | 14 | B= | 1.007586 |
| I= | 11 | J= | 12 | B= | 1.156266 |

|    |   |    |    |    |    |    |         |
|----|---|----|----|----|----|----|---------|
| I= | 1 | J= | 2  | K= | 3  | A= | 121.134 |
| I= | 1 | J= | 2  | K= | 8  | A= | 119.491 |
| I= | 1 | J= | 6  | K= | 7  | A= | 122.416 |
| I= | 1 | J= | 11 | K= | 12 | A= | 175.906 |
| I= | 2 | J= | 3  | K= | 4  | A= | 119.305 |
| I= | 2 | J= | 3  | K= | 15 | A= | 120.151 |
| I= | 3 | J= | 4  | K= | 5  | A= | 119.562 |
| I= | 3 | J= | 4  | K= | 10 | A= | 119.991 |
| I= | 4 | J= | 5  | K= | 6  | A= | 122.483 |
| I= | 4 | J= | 5  | K= | 9  | A= | 119.991 |
| I= | 5 | J= | 6  | K= | 7  | A= | 120.393 |
| I= | 6 | J= | 7  | K= | 13 | A= | 118.579 |
| I= | 6 | J= | 7  | K= | 14 | A= | 118.936 |

|    |   |    |   |    |   |    |    |    |         |
|----|---|----|---|----|---|----|----|----|---------|
| I= | 1 | J= | 2 | K= | 3 | L= | 4  | D= | 0.186   |
| I= | 1 | J= | 2 | K= | 3 | L= | 15 | D= | 179.970 |
| I= | 1 | J= | 6 | K= | 7 | L= | 13 | D= | 167.061 |
| I= | 1 | J= | 6 | K= | 7 | L= | 14 | D= | 13.930  |
| I= | 2 | J= | 3 | K= | 4 | L= | 5  | D= | 0.261   |
| I= | 2 | J= | 3 | K= | 4 | L= | 10 | D= | 179.701 |
| I= | 3 | J= | 4 | K= | 5 | L= | 6  | D= | 0.032   |
| I= | 3 | J= | 4 | K= | 5 | L= | 9  | D= | 179.800 |
| I= | 4 | J= | 5 | K= | 6 | L= | 7  | D= | 177.822 |
| I= | 5 | J= | 6 | K= | 7 | L= | 13 | D= | 14.826  |
| I= | 5 | J= | 6 | K= | 7 | L= | 14 | D= | 167.957 |

molD\_b3lypd

|    |    |    |    |    |          |
|----|----|----|----|----|----------|
| I= | 1  | J= | 2  | B= | 1.399966 |
| I= | 1  | J= | 6  | B= | 1.414644 |
| I= | 1  | J= | 11 | B= | 1.418726 |
| I= | 2  | J= | 3  | B= | 1.380648 |
| I= | 2  | J= | 8  | B= | 1.335224 |
| I= | 3  | J= | 4  | B= | 1.399112 |
| I= | 3  | J= | 15 | B= | 1.337213 |
| I= | 4  | J= | 5  | B= | 1.385309 |
| I= | 4  | J= | 10 | B= | 1.725973 |
| I= | 5  | J= | 6  | B= | 1.400232 |
| I= | 5  | J= | 9  | B= | 1.348652 |
| I= | 6  | J= | 7  | B= | 1.365754 |
| I= | 7  | J= | 13 | B= | 1.006588 |
| I= | 7  | J= | 14 | B= | 1.008125 |
| I= | 11 | J= | 12 | B= | 1.156071 |

|    |   |    |    |    |    |    |         |
|----|---|----|----|----|----|----|---------|
| I= | 1 | J= | 2  | K= | 3  | A= | 121.414 |
| I= | 1 | J= | 2  | K= | 8  | A= | 119.298 |
| I= | 1 | J= | 6  | K= | 7  | A= | 122.339 |
| I= | 1 | J= | 11 | K= | 12 | A= | 175.728 |
| I= | 2 | J= | 3  | K= | 4  | A= | 119.437 |

|    |   |    |   |    |    |    |         |
|----|---|----|---|----|----|----|---------|
| I= | 2 | J= | 3 | K= | 15 | A= | 120.034 |
| I= | 3 | J= | 4 | K= | 5  | A= | 119.230 |
| I= | 3 | J= | 4 | K= | 10 | A= | 120.150 |
| I= | 4 | J= | 5 | K= | 6  | A= | 122.753 |
| I= | 4 | J= | 5 | K= | 9  | A= | 120.010 |
| I= | 5 | J= | 6 | K= | 7  | A= | 120.428 |
| I= | 6 | J= | 7 | K= | 13 | A= | 118.403 |
| I= | 6 | J= | 7 | K= | 14 | A= | 118.975 |

|    |   |    |   |    |   |    |    |    |         |
|----|---|----|---|----|---|----|----|----|---------|
| I= | 1 | J= | 2 | K= | 3 | L= | 4  | D= | 0.189   |
| I= | 1 | J= | 2 | K= | 3 | L= | 15 | D= | 179.963 |
| I= | 1 | J= | 6 | K= | 7 | L= | 13 | D= | 167.258 |
| I= | 1 | J= | 6 | K= | 7 | L= | 14 | D= | 14.321  |
| I= | 2 | J= | 3 | K= | 4 | L= | 5  | D= | 0.249   |
| I= | 2 | J= | 3 | K= | 4 | L= | 10 | D= | 179.686 |
| I= | 3 | J= | 4 | K= | 5 | L= | 6  | D= | 0.060   |
| I= | 3 | J= | 4 | K= | 5 | L= | 9  | D= | 179.762 |
| I= | 4 | J= | 5 | K= | 6 | L= | 7  | D= | 177.788 |
| I= | 5 | J= | 6 | K= | 7 | L= | 13 | D= | 14.636  |
| I= | 5 | J= | 6 | K= | 7 | L= | 14 | D= | 167.573 |

molD\_blyp

|    |    |    |    |    |          |
|----|----|----|----|----|----------|
| I= | 1  | J= | 2  | B= | 1.412647 |
| I= | 1  | J= | 6  | B= | 1.429932 |
| I= | 1  | J= | 11 | B= | 1.424099 |
| I= | 2  | J= | 3  | B= | 1.392719 |
| I= | 2  | J= | 8  | B= | 1.353923 |
| I= | 3  | J= | 4  | B= | 1.410278 |
| I= | 3  | J= | 15 | B= | 1.354994 |
| I= | 4  | J= | 5  | B= | 1.397118 |
| I= | 4  | J= | 10 | B= | 1.744802 |
| I= | 5  | J= | 6  | B= | 1.411801 |
| I= | 5  | J= | 9  | B= | 1.368116 |
| I= | 6  | J= | 7  | B= | 1.377694 |
| I= | 7  | J= | 13 | B= | 1.014552 |
| I= | 7  | J= | 14 | B= | 1.015991 |
| I= | 11 | J= | 12 | B= | 1.169504 |

|    |   |    |    |    |    |    |         |
|----|---|----|----|----|----|----|---------|
| I= | 1 | J= | 2  | K= | 3  | A= | 121.657 |
| I= | 1 | J= | 2  | K= | 8  | A= | 119.243 |
| I= | 1 | J= | 6  | K= | 7  | A= | 122.321 |
| I= | 1 | J= | 11 | K= | 12 | A= | 176.048 |
| I= | 2 | J= | 3  | K= | 4  | A= | 119.520 |
| I= | 2 | J= | 3  | K= | 15 | A= | 119.927 |
| I= | 3 | J= | 4  | K= | 5  | A= | 118.993 |
| I= | 3 | J= | 4  | K= | 10 | A= | 120.267 |
| I= | 4 | J= | 5  | K= | 6  | A= | 123.003 |
| I= | 4 | J= | 5  | K= | 9  | A= | 119.896 |
| I= | 5 | J= | 6  | K= | 7  | A= | 120.402 |
| I= | 6 | J= | 7  | K= | 13 | A= | 118.176 |
| I= | 6 | J= | 7  | K= | 14 | A= | 118.759 |

|    |   |    |   |    |   |    |    |    |         |
|----|---|----|---|----|---|----|----|----|---------|
| I= | 1 | J= | 2 | K= | 3 | L= | 4  | D= | 0.203   |
| I= | 1 | J= | 2 | K= | 3 | L= | 15 | D= | 179.934 |
| I= | 1 | J= | 6 | K= | 7 | L= | 13 | D= | 166.438 |



|    |   |    |   |    |   |    |    |    |         |
|----|---|----|---|----|---|----|----|----|---------|
| I= | 1 | J= | 6 | K= | 7 | L= | 14 | D= | 15.562  |
| I= | 2 | J= | 3 | K= | 4 | L= | 5  | D= | 0.276   |
| I= | 2 | J= | 3 | K= | 4 | L= | 10 | D= | 179.639 |
| I= | 3 | J= | 4 | K= | 5 | L= | 6  | D= | 0.077   |
| I= | 3 | J= | 4 | K= | 5 | L= | 9  | D= | 179.735 |
| I= | 4 | J= | 5 | K= | 6 | L= | 7  | D= | 177.438 |
| I= | 5 | J= | 6 | K= | 7 | L= | 13 | D= | 15.744  |
| I= | 5 | J= | 6 | K= | 7 | L= | 14 | D= | 166.620 |

molD\_camb3lypd

|    |    |    |    |    |          |
|----|----|----|----|----|----------|
| I= | 1  | J= | 2  | B= | 1.393874 |
| I= | 1  | J= | 6  | B= | 1.405779 |
| I= | 1  | J= | 11 | B= | 1.421308 |
| I= | 2  | J= | 3  | B= | 1.374411 |
| I= | 2  | J= | 8  | B= | 1.328792 |
| I= | 3  | J= | 4  | B= | 1.393336 |
| I= | 3  | J= | 15 | B= | 1.331612 |
| I= | 4  | J= | 5  | B= | 1.378463 |
| I= | 4  | J= | 10 | B= | 1.717084 |
| I= | 5  | J= | 6  | B= | 1.395682 |
| I= | 5  | J= | 9  | B= | 1.342503 |
| I= | 6  | J= | 7  | B= | 1.360464 |
| I= | 7  | J= | 13 | B= | 1.005471 |
| I= | 7  | J= | 14 | B= | 1.006851 |
| I= | 11 | J= | 12 | B= | 1.149207 |

|    |   |    |    |    |    |    |         |
|----|---|----|----|----|----|----|---------|
| I= | 1 | J= | 2  | K= | 3  | A= | 121.391 |
| I= | 1 | J= | 2  | K= | 8  | A= | 119.323 |
| I= | 1 | J= | 6  | K= | 7  | A= | 122.618 |
| I= | 1 | J= | 11 | K= | 12 | A= | 175.870 |
| I= | 2 | J= | 3  | K= | 4  | A= | 119.430 |
| I= | 2 | J= | 3  | K= | 15 | A= | 120.030 |
| I= | 3 | J= | 4  | K= | 5  | A= | 119.174 |
| I= | 3 | J= | 4  | K= | 10 | A= | 120.191 |
| I= | 4 | J= | 5  | K= | 6  | A= | 122.815 |
| I= | 4 | J= | 5  | K= | 9  | A= | 120.054 |
| I= | 5 | J= | 6  | K= | 7  | A= | 120.244 |
| I= | 6 | J= | 7  | K= | 13 | A= | 118.964 |
| I= | 6 | J= | 7  | K= | 14 | A= | 119.748 |

|    |   |    |   |    |   |    |    |    |         |
|----|---|----|---|----|---|----|----|----|---------|
| I= | 1 | J= | 2 | K= | 3 | L= | 4  | D= | 0.148   |
| I= | 1 | J= | 2 | K= | 3 | L= | 15 | D= | 179.978 |
| I= | 1 | J= | 6 | K= | 7 | L= | 13 | D= | 170.027 |
| I= | 1 | J= | 6 | K= | 7 | L= | 14 | D= | 11.404  |
| I= | 2 | J= | 3 | K= | 4 | L= | 5  | D= | 0.183   |
| I= | 2 | J= | 3 | K= | 4 | L= | 10 | D= | 179.765 |
| I= | 3 | J= | 4 | K= | 5 | L= | 6  | D= | 0.050   |
| I= | 3 | J= | 4 | K= | 5 | L= | 9  | D= | 179.797 |
| I= | 4 | J= | 5 | K= | 6 | L= | 7  | D= | 178.359 |
| I= | 5 | J= | 6 | K= | 7 | L= | 13 | D= | 11.382  |
| I= | 5 | J= | 6 | K= | 7 | L= | 14 | D= | 170.006 |

molD\_m062x

|    |   |    |   |    |          |
|----|---|----|---|----|----------|
| I= | 1 | J= | 2 | B= | 1.395510 |
|----|---|----|---|----|----------|

|    |    |    |    |    |          |
|----|----|----|----|----|----------|
| I= | 1  | J= | 6  | B= | 1.406771 |
| I= | 1  | J= | 11 | B= | 1.425732 |
| I= | 2  | J= | 3  | B= | 1.377631 |
| I= | 2  | J= | 8  | B= | 1.325379 |
| I= | 3  | J= | 4  | B= | 1.395609 |
| I= | 3  | J= | 15 | B= | 1.327829 |
| I= | 4  | J= | 5  | B= | 1.381463 |
| I= | 4  | J= | 10 | B= | 1.714501 |
| I= | 5  | J= | 6  | B= | 1.397804 |
| I= | 5  | J= | 9  | B= | 1.337644 |
| I= | 6  | J= | 7  | B= | 1.364867 |
| I= | 7  | J= | 13 | B= | 1.007165 |
| I= | 7  | J= | 14 | B= | 1.008750 |
| I= | 11 | J= | 12 | B= | 1.150758 |

|    |   |    |    |    |    |    |         |
|----|---|----|----|----|----|----|---------|
| I= | 1 | J= | 2  | K= | 3  | A= | 121.184 |
| I= | 1 | J= | 2  | K= | 8  | A= | 119.469 |
| I= | 1 | J= | 6  | K= | 7  | A= | 122.614 |
| I= | 1 | J= | 11 | K= | 12 | A= | 175.779 |
| I= | 2 | J= | 3  | K= | 4  | A= | 119.378 |
| I= | 2 | J= | 3  | K= | 15 | A= | 120.084 |
| I= | 3 | J= | 4  | K= | 5  | A= | 119.361 |
| I= | 3 | J= | 4  | K= | 10 | A= | 120.096 |
| I= | 4 | J= | 5  | K= | 6  | A= | 122.634 |
| I= | 4 | J= | 5  | K= | 9  | A= | 120.077 |
| I= | 5 | J= | 6  | K= | 7  | A= | 120.259 |
| I= | 6 | J= | 7  | K= | 13 | A= | 117.931 |
| I= | 6 | J= | 7  | K= | 14 | A= | 118.557 |

|    |   |    |   |    |   |    |    |    |         |
|----|---|----|---|----|---|----|----|----|---------|
| I= | 1 | J= | 2 | K= | 3 | L= | 4  | D= | 0.202   |
| I= | 1 | J= | 2 | K= | 3 | L= | 15 | D= | 179.978 |
| I= | 1 | J= | 6 | K= | 7 | L= | 13 | D= | 166.099 |
| I= | 1 | J= | 6 | K= | 7 | L= | 14 | D= | 15.833  |
| I= | 2 | J= | 3 | K= | 4 | L= | 5  | D= | 0.250   |
| I= | 2 | J= | 3 | K= | 4 | L= | 10 | D= | 179.702 |
| I= | 3 | J= | 4 | K= | 5 | L= | 6  | D= | 0.006   |
| I= | 3 | J= | 4 | K= | 5 | L= | 9  | D= | 179.764 |
| I= | 4 | J= | 5 | K= | 6 | L= | 7  | D= | 177.665 |
| I= | 5 | J= | 6 | K= | 7 | L= | 13 | D= | 16.052  |
| I= | 5 | J= | 6 | K= | 7 | L= | 14 | D= | 166.317 |

molD\_mp2

|    |   |    |    |    |          |
|----|---|----|----|----|----------|
| I= | 1 | J= | 2  | B= | 1.401058 |
| I= | 1 | J= | 6  | B= | 1.413117 |
| I= | 1 | J= | 11 | B= | 1.426673 |
| I= | 2 | J= | 3  | B= | 1.388184 |
| I= | 2 | J= | 8  | B= | 1.335069 |
| I= | 3 | J= | 4  | B= | 1.400992 |
| I= | 3 | J= | 15 | B= | 1.332398 |
| I= | 4 | J= | 5  | B= | 1.394354 |
| I= | 4 | J= | 10 | B= | 1.712615 |
| I= | 5 | J= | 6  | B= | 1.400162 |
| I= | 5 | J= | 9  | B= | 1.342511 |
| I= | 6 | J= | 7  | B= | 1.383364 |
| I= | 7 | J= | 13 | B= | 1.010824 |

|    |    |    |    |    |    |          |         |
|----|----|----|----|----|----|----------|---------|
| I= | 7  | J= | 14 |    | B= | 1.012154 |         |
| I= | 11 | J= | 12 |    | B= | 1.178844 |         |
| I= | 1  | J= | 2  | K= | 3  | A=       | 120.879 |
| I= | 1  | J= | 2  | K= | 8  | A=       | 119.593 |
| I= | 1  | J= | 6  | K= | 7  | A=       | 122.004 |
| I= | 1  | J= | 11 | K= | 12 | A=       | 175.824 |
| I= | 2  | J= | 3  | K= | 4  | A=       | 119.723 |
| I= | 2  | J= | 3  | K= | 15 | A=       | 119.722 |
| I= | 3  | J= | 4  | K= | 5  | A=       | 118.760 |
| I= | 3  | J= | 4  | K= | 10 | A=       | 120.409 |
| I= | 4  | J= | 5  | K= | 6  | A=       | 122.798 |
| I= | 4  | J= | 5  | K= | 9  | A=       | 119.665 |
| I= | 5  | J= | 6  | K= | 7  | A=       | 120.483 |
| I= | 6  | J= | 7  | K= | 13 | A=       | 115.215 |
| I= | 6  | J= | 7  | K= | 14 | A=       | 115.663 |

|    |   |    |   |    |   |    |    |    |         |
|----|---|----|---|----|---|----|----|----|---------|
| I= | 1 | J= | 2 | K= | 3 | L= | 4  | D= | 4.508   |
| I= | 1 | J= | 2 | K= | 3 | L= | 15 | D= | 178.892 |
| I= | 1 | J= | 6 | K= | 7 | L= | 13 | D= | 161.997 |
| I= | 1 | J= | 6 | K= | 7 | L= | 14 | D= | 26.223  |
| I= | 2 | J= | 3 | K= | 4 | L= | 5  | D= | 4.802   |
| I= | 2 | J= | 3 | K= | 4 | L= | 10 | D= | 179.560 |
| I= | 3 | J= | 4 | K= | 5 | L= | 6  | D= | 5.065   |
| I= | 3 | J= | 4 | K= | 5 | L= | 9  | D= | 178.951 |
| I= | 4 | J= | 5 | K= | 6 | L= | 7  | D= | 178.000 |
| I= | 5 | J= | 6 | K= | 7 | L= | 13 | D= | 25.050  |
| I= | 5 | J= | 6 | K= | 7 | L= | 14 | D= | 160.824 |

molD\_pbe0d

|    |    |    |    |    |    |          |         |
|----|----|----|----|----|----|----------|---------|
| I= | 1  | J= | 2  |    | B= | 1.396500 |         |
| I= | 1  | J= | 6  |    | B= | 1.409781 |         |
| I= | 1  | J= | 11 |    | B= | 1.416172 |         |
| I= | 2  | J= | 3  |    | B= | 1.377971 |         |
| I= | 2  | J= | 8  |    | B= | 1.324625 |         |
| I= | 3  | J= | 4  |    | B= | 1.396169 |         |
| I= | 3  | J= | 15 |    | B= | 1.326860 |         |
| I= | 4  | J= | 5  |    | B= | 1.382768 |         |
| I= | 4  | J= | 10 |    | B= | 1.710138 |         |
| I= | 5  | J= | 6  |    | B= | 1.396896 |         |
| I= | 5  | J= | 9  |    | B= | 1.337389 |         |
| I= | 6  | J= | 7  |    | B= | 1.359898 |         |
| I= | 7  | J= | 13 |    | B= | 1.005545 |         |
| I= | 7  | J= | 14 |    | B= | 1.007280 |         |
| I= | 11 | J= | 12 |    | B= | 1.155435 |         |
| I= | 1  | J= | 2  | K= | 3  | A=       | 121.242 |
| I= | 1  | J= | 2  | K= | 8  | A=       | 119.402 |
| I= | 1  | J= | 6  | K= | 7  | A=       | 122.397 |
| I= | 1  | J= | 11 | K= | 12 | A=       | 175.805 |
| I= | 2  | J= | 3  | K= | 4  | A=       | 119.364 |
| I= | 2  | J= | 3  | K= | 15 | A=       | 120.112 |
| I= | 3  | J= | 4  | K= | 5  | A=       | 119.394 |
| I= | 3  | J= | 4  | K= | 10 | A=       | 120.080 |
| I= | 4  | J= | 5  | K= | 6  | A=       | 122.620 |

|    |   |    |   |    |    |    |         |    |         |
|----|---|----|---|----|----|----|---------|----|---------|
| I= | 4 | J= | 5 | K= | 9  | A= | 120.028 |    |         |
| I= | 5 | J= | 6 | K= | 7  | A= | 120.430 |    |         |
| I= | 6 | J= | 7 | K= | 13 | A= | 118.263 |    |         |
| I= | 6 | J= | 7 | K= | 14 | A= | 118.769 |    |         |
|    |   |    |   |    |    |    |         |    |         |
| I= | 1 | J= | 2 | K= | 3  | L= | 4       | D= | 0.203   |
| I= | 1 | J= | 2 | K= | 3  | L= | 15      | D= | 179.965 |
| I= | 1 | J= | 6 | K= | 7  | L= | 13      | D= | 166.738 |
| I= | 1 | J= | 6 | K= | 7  | L= | 14      | D= | 14.573  |
| I= | 2 | J= | 3 | K= | 4  | L= | 5       | D= | 0.274   |
| I= | 2 | J= | 3 | K= | 4  | L= | 10      | D= | 179.681 |
| I= | 3 | J= | 4 | K= | 5  | L= | 6       | D= | 0.031   |
| I= | 3 | J= | 4 | K= | 5  | L= | 9       | D= | 179.771 |
| I= | 4 | J= | 5 | K= | 6  | L= | 7       | D= | 177.763 |
| I= | 5 | J= | 6 | K= | 7  | L= | 13      | D= | 15.205  |
| I= | 5 | J= | 6 | K= | 7  | L= | 14      | D= | 167.369 |

molD\_pbe

|    |    |    |    |    |          |
|----|----|----|----|----|----------|
| I= | 1  | J= | 2  | B= | 1.408540 |
| I= | 1  | J= | 6  | B= | 1.424534 |
| I= | 1  | J= | 11 | B= | 1.418592 |
| I= | 2  | J= | 3  | B= | 1.389964 |
| I= | 2  | J= | 8  | B= | 1.342793 |
| I= | 3  | J= | 4  | B= | 1.407195 |
| I= | 3  | J= | 15 | B= | 1.344096 |
| I= | 4  | J= | 5  | B= | 1.394442 |
| I= | 4  | J= | 10 | B= | 1.724999 |
| I= | 5  | J= | 6  | B= | 1.407667 |
| I= | 5  | J= | 9  | B= | 1.356167 |
| I= | 6  | J= | 7  | B= | 1.369768 |
| I= | 7  | J= | 13 | B= | 1.014362 |
| I= | 7  | J= | 14 | B= | 1.016192 |
| I= | 11 | J= | 12 | B= | 1.170436 |

|    |   |    |    |    |    |    |         |
|----|---|----|----|----|----|----|---------|
| I= | 1 | J= | 2  | K= | 3  | A= | 121.431 |
| I= | 1 | J= | 2  | K= | 8  | A= | 119.355 |
| I= | 1 | J= | 6  | K= | 7  | A= | 122.264 |
| I= | 1 | J= | 11 | K= | 12 | A= | 175.748 |
| I= | 2 | J= | 3  | K= | 4  | A= | 119.441 |
| I= | 2 | J= | 3  | K= | 15 | A= | 120.045 |
| I= | 3 | J= | 4  | K= | 5  | A= | 119.199 |
| I= | 3 | J= | 4  | K= | 10 | A= | 120.168 |
| I= | 4 | J= | 5  | K= | 6  | A= | 122.808 |
| I= | 4 | J= | 5  | K= | 9  | A= | 119.937 |
| I= | 5 | J= | 6  | K= | 7  | A= | 120.491 |
| I= | 6 | J= | 7  | K= | 13 | A= | 118.158 |
| I= | 6 | J= | 7  | K= | 14 | A= | 118.568 |

|    |   |    |   |    |   |    |    |    |         |
|----|---|----|---|----|---|----|----|----|---------|
| I= | 1 | J= | 2 | K= | 3 | L= | 4  | D= | 0.217   |
| I= | 1 | J= | 2 | K= | 3 | L= | 15 | D= | 179.936 |
| I= | 1 | J= | 6 | K= | 7 | L= | 13 | D= | 166.233 |
| I= | 1 | J= | 6 | K= | 7 | L= | 14 | D= | 15.150  |
| I= | 2 | J= | 3 | K= | 4 | L= | 5  | D= | 0.309   |
| I= | 2 | J= | 3 | K= | 4 | L= | 10 | D= | 179.630 |
| I= | 3 | J= | 4 | K= | 5 | L= | 6  | D= | 0.052   |

|    |   |    |   |    |   |    |    |    |         |
|----|---|----|---|----|---|----|----|----|---------|
| I= | 3 | J= | 4 | K= | 5 | L= | 9  | D= | 179.746 |
| I= | 4 | J= | 5 | K= | 6 | L= | 7  | D= | 177.500 |
| I= | 5 | J= | 6 | K= | 7 | L= | 13 | D= | 15.882  |
| I= | 5 | J= | 6 | K= | 7 | L= | 14 | D= | 166.965 |

molD\_rtpss

|    |    |    |    |    |          |
|----|----|----|----|----|----------|
| I= | 1  | J= | 2  | B= | 1.405992 |
| I= | 1  | J= | 6  | B= | 1.421123 |
| I= | 1  | J= | 11 | B= | 1.419561 |
| I= | 2  | J= | 3  | B= | 1.386729 |
| I= | 2  | J= | 8  | B= | 1.343714 |
| I= | 3  | J= | 4  | B= | 1.403907 |
| I= | 3  | J= | 15 | B= | 1.344802 |
| I= | 4  | J= | 5  | B= | 1.391717 |
| I= | 4  | J= | 10 | B= | 1.725176 |
| I= | 5  | J= | 6  | B= | 1.403482 |
| I= | 5  | J= | 9  | B= | 1.357132 |
| I= | 6  | J= | 7  | B= | 1.375708 |
| I= | 7  | J= | 13 | B= | 1.014539 |
| I= | 7  | J= | 14 | B= | 1.016187 |
| I= | 11 | J= | 12 | B= | 1.168208 |

|    |   |    |    |    |    |    |         |
|----|---|----|----|----|----|----|---------|
| I= | 1 | J= | 2  | K= | 3  | A= | 121.482 |
| I= | 1 | J= | 2  | K= | 8  | A= | 119.292 |
| I= | 1 | J= | 6  | K= | 7  | A= | 122.268 |
| I= | 1 | J= | 11 | K= | 12 | A= | 175.927 |
| I= | 2 | J= | 3  | K= | 4  | A= | 119.453 |
| I= | 2 | J= | 3  | K= | 15 | A= | 120.085 |
| I= | 3 | J= | 4  | K= | 5  | A= | 119.098 |
| I= | 3 | J= | 4  | K= | 10 | A= | 120.227 |
| I= | 4 | J= | 5  | K= | 6  | A= | 122.916 |
| I= | 4 | J= | 5  | K= | 9  | A= | 119.842 |
| I= | 5 | J= | 6  | K= | 7  | A= | 120.445 |
| I= | 6 | J= | 7  | K= | 13 | A= | 116.496 |
| I= | 6 | J= | 7  | K= | 14 | A= | 116.982 |

|    |   |    |   |    |   |    |    |    |         |
|----|---|----|---|----|---|----|----|----|---------|
| I= | 1 | J= | 2 | K= | 3 | L= | 4  | D= | 0.299   |
| I= | 1 | J= | 2 | K= | 3 | L= | 15 | D= | 179.934 |
| I= | 1 | J= | 6 | K= | 7 | L= | 13 | D= | 162.213 |
| I= | 1 | J= | 6 | K= | 7 | L= | 14 | D= | 20.106  |
| I= | 2 | J= | 3 | K= | 4 | L= | 5  | D= | 0.411   |
| I= | 2 | J= | 3 | K= | 4 | L= | 10 | D= | 179.512 |
| I= | 3 | J= | 4 | K= | 5 | L= | 6  | D= | 0.012   |
| I= | 3 | J= | 4 | K= | 5 | L= | 9  | D= | 179.689 |
| I= | 4 | J= | 5 | K= | 6 | L= | 7  | D= | 176.573 |
| I= | 5 | J= | 6 | K= | 7 | L= | 13 | D= | 20.881  |
| I= | 5 | J= | 6 | K= | 7 | L= | 14 | D= | 162.988 |

molD\_wb97xd

|    |   |    |    |    |          |
|----|---|----|----|----|----------|
| I= | 1 | J= | 2  | B= | 1.396109 |
| I= | 1 | J= | 6  | B= | 1.407428 |
| I= | 1 | J= | 11 | B= | 1.423216 |
| I= | 2 | J= | 3  | B= | 1.377824 |
| I= | 2 | J= | 8  | B= | 1.325906 |

|    |    |    |    |    |          |
|----|----|----|----|----|----------|
| I= | 3  | J= | 4  | B= | 1.395638 |
| I= | 3  | J= | 15 | B= | 1.328681 |
| I= | 4  | J= | 5  | B= | 1.381796 |
| I= | 4  | J= | 10 | B= | 1.718811 |
| I= | 5  | J= | 6  | B= | 1.398074 |
| I= | 5  | J= | 9  | B= | 1.339380 |
| I= | 6  | J= | 7  | B= | 1.363514 |
| I= | 7  | J= | 13 | B= | 1.005233 |
| I= | 7  | J= | 14 | B= | 1.006884 |
| I= | 11 | J= | 12 | B= | 1.152199 |

|    |   |    |    |    |    |    |         |
|----|---|----|----|----|----|----|---------|
| I= | 1 | J= | 2  | K= | 3  | A= | 121.251 |
| I= | 1 | J= | 2  | K= | 8  | A= | 119.385 |
| I= | 1 | J= | 6  | K= | 7  | A= | 122.497 |
| I= | 1 | J= | 11 | K= | 12 | A= | 175.976 |
| I= | 2 | J= | 3  | K= | 4  | A= | 119.380 |
| I= | 2 | J= | 3  | K= | 15 | A= | 120.024 |
| I= | 3 | J= | 4  | K= | 5  | A= | 119.328 |
| I= | 3 | J= | 4  | K= | 10 | A= | 120.126 |
| I= | 4 | J= | 5  | K= | 6  | A= | 122.666 |
| I= | 4 | J= | 5  | K= | 9  | A= | 120.050 |
| I= | 5 | J= | 6  | K= | 7  | A= | 120.357 |
| I= | 6 | J= | 7  | K= | 13 | A= | 118.413 |
| I= | 6 | J= | 7  | K= | 14 | A= | 119.027 |

|    |   |    |   |    |   |    |    |    |         |
|----|---|----|---|----|---|----|----|----|---------|
| I= | 1 | J= | 2 | K= | 3 | L= | 4  | D= | 0.196   |
| I= | 1 | J= | 2 | K= | 3 | L= | 15 | D= | 179.965 |
| I= | 1 | J= | 6 | K= | 7 | L= | 13 | D= | 167.246 |
| I= | 1 | J= | 6 | K= | 7 | L= | 14 | D= | 14.426  |
| I= | 2 | J= | 3 | K= | 4 | L= | 5  | D= | 0.242   |
| I= | 2 | J= | 3 | K= | 4 | L= | 10 | D= | 179.720 |
| I= | 3 | J= | 4 | K= | 5 | L= | 6  | D= | 0.018   |
| I= | 3 | J= | 4 | K= | 5 | L= | 9  | D= | 179.779 |
| I= | 4 | J= | 5 | K= | 6 | L= | 7  | D= | 177.844 |
| I= | 5 | J= | 6 | K= | 7 | L= | 13 | D= | 14.698  |
| I= | 5 | J= | 6 | K= | 7 | L= | 14 | D= | 167.518 |

molD\_x3lyp

|    |    |    |    |    |          |
|----|----|----|----|----|----------|
| I= | 1  | J= | 2  | B= | 1.400058 |
| I= | 1  | J= | 6  | B= | 1.414605 |
| I= | 1  | J= | 11 | B= | 1.420077 |
| I= | 2  | J= | 3  | B= | 1.380260 |
| I= | 2  | J= | 8  | B= | 1.334106 |
| I= | 3  | J= | 4  | B= | 1.398551 |
| I= | 3  | J= | 15 | B= | 1.336199 |
| I= | 4  | J= | 5  | B= | 1.384834 |
| I= | 4  | J= | 10 | B= | 1.726042 |
| I= | 5  | J= | 6  | B= | 1.400478 |
| I= | 5  | J= | 9  | B= | 1.347714 |
| I= | 6  | J= | 7  | B= | 1.365509 |
| I= | 7  | J= | 13 | B= | 1.006484 |
| I= | 7  | J= | 14 | B= | 1.007890 |
| I= | 11 | J= | 12 | B= | 1.155426 |

|    |   |    |   |    |   |    |         |
|----|---|----|---|----|---|----|---------|
| I= | 1 | J= | 2 | K= | 3 | A= | 121.490 |
|----|---|----|---|----|---|----|---------|

|    |   |    |    |    |    |    |         |
|----|---|----|----|----|----|----|---------|
| I= | 1 | J= | 2  | K= | 8  | A= | 119.311 |
| I= | 1 | J= | 6  | K= | 7  | A= | 122.497 |
| I= | 1 | J= | 11 | K= | 12 | A= | 176.042 |
| I= | 2 | J= | 3  | K= | 4  | A= | 119.461 |
| I= | 2 | J= | 3  | K= | 15 | A= | 119.980 |
| I= | 3 | J= | 4  | K= | 5  | A= | 119.141 |
| I= | 3 | J= | 4  | K= | 10 | A= | 120.203 |
| I= | 4 | J= | 5  | K= | 6  | A= | 122.857 |
| I= | 4 | J= | 5  | K= | 9  | A= | 119.986 |
| I= | 5 | J= | 6  | K= | 7  | A= | 120.303 |
| I= | 6 | J= | 7  | K= | 13 | A= | 118.538 |
| I= | 6 | J= | 7  | K= | 14 | A= | 119.213 |

|    |   |    |   |    |   |    |    |    |         |
|----|---|----|---|----|---|----|----|----|---------|
| I= | 1 | J= | 2 | K= | 3 | L= | 4  | D= | 0.178   |
| I= | 1 | J= | 2 | K= | 3 | L= | 15 | D= | 179.966 |
| I= | 1 | J= | 6 | K= | 7 | L= | 13 | D= | 167.830 |
| I= | 1 | J= | 6 | K= | 7 | L= | 14 | D= | 13.908  |
| I= | 2 | J= | 3 | K= | 4 | L= | 5  | D= | 0.231   |
| I= | 2 | J= | 3 | K= | 4 | L= | 10 | D= | 179.706 |
| I= | 3 | J= | 4 | K= | 5 | L= | 6  | D= | 0.058   |
| I= | 3 | J= | 4 | K= | 5 | L= | 9  | D= | 179.775 |
| I= | 4 | J= | 5 | K= | 6 | L= | 7  | D= | 177.859 |
| I= | 5 | J= | 6 | K= | 7 | L= | 13 | D= | 14.019  |
| I= | 5 | J= | 6 | K= | 7 | L= | 14 | D= | 167.941 |

molE\_apfd

|    |    |    |    |    |          |
|----|----|----|----|----|----------|
| I= | 1  | J= | 2  | B= | 1.398493 |
| I= | 1  | J= | 6  | B= | 1.412185 |
| I= | 1  | J= | 12 | B= | 1.417009 |
| I= | 2  | J= | 3  | B= | 1.376460 |
| I= | 2  | J= | 8  | B= | 1.334501 |
| I= | 3  | J= | 4  | B= | 1.396416 |
| I= | 3  | J= | 11 | B= | 1.081756 |
| I= | 4  | J= | 5  | B= | 1.381329 |
| I= | 4  | J= | 10 | B= | 1.721416 |
| I= | 5  | J= | 6  | B= | 1.401284 |
| I= | 5  | J= | 9  | B= | 1.343111 |
| I= | 6  | J= | 7  | B= | 1.355689 |
| I= | 7  | J= | 14 | B= | 1.005140 |
| I= | 7  | J= | 15 | B= | 1.007045 |
| I= | 12 | J= | 13 | B= | 1.156568 |

|    |   |    |    |    |    |    |         |
|----|---|----|----|----|----|----|---------|
| I= | 1 | J= | 2  | K= | 3  | A= | 122.694 |
| I= | 1 | J= | 2  | K= | 8  | A= | 117.984 |
| I= | 1 | J= | 6  | K= | 7  | A= | 122.297 |
| I= | 1 | J= | 12 | K= | 13 | A= | 175.816 |
| I= | 2 | J= | 3  | K= | 4  | A= | 117.728 |
| I= | 2 | J= | 3  | K= | 11 | A= | 120.830 |
| I= | 3 | J= | 4  | K= | 5  | A= | 120.850 |
| I= | 3 | J= | 4  | K= | 10 | A= | 120.099 |
| I= | 4 | J= | 5  | K= | 6  | A= | 121.849 |
| I= | 4 | J= | 5  | K= | 9  | A= | 120.908 |
| I= | 5 | J= | 6  | K= | 7  | A= | 120.246 |
| I= | 6 | J= | 7  | K= | 14 | A= | 119.397 |
| I= | 6 | J= | 7  | K= | 15 | A= | 119.734 |

|    |   |    |   |    |   |    |    |    |         |
|----|---|----|---|----|---|----|----|----|---------|
| I= | 1 | J= | 2 | K= | 3 | L= | 4  | D= | 0.124   |
| I= | 1 | J= | 2 | K= | 3 | L= | 11 | D= | 179.983 |
| I= | 1 | J= | 6 | K= | 7 | L= | 14 | D= | 170.555 |
| I= | 1 | J= | 6 | K= | 7 | L= | 15 | D= | 10.145  |
| I= | 2 | J= | 3 | K= | 4 | L= | 5  | D= | 0.183   |
| I= | 2 | J= | 3 | K= | 4 | L= | 10 | D= | 179.777 |
| I= | 3 | J= | 4 | K= | 5 | L= | 6  | D= | 0.038   |
| I= | 3 | J= | 4 | K= | 5 | L= | 9  | D= | 179.841 |
| I= | 4 | J= | 5 | K= | 6 | L= | 7  | D= | 178.435 |
| I= | 5 | J= | 6 | K= | 7 | L= | 14 | D= | 10.760  |
| I= | 5 | J= | 6 | K= | 7 | L= | 15 | D= | 171.170 |

molE\_b3lypd

|    |    |    |    |    |          |
|----|----|----|----|----|----------|
| I= | 1  | J= | 2  | B= | 1.399762 |
| I= | 1  | J= | 6  | B= | 1.416044 |
| I= | 1  | J= | 12 | B= | 1.418385 |
| I= | 2  | J= | 3  | B= | 1.376983 |
| I= | 2  | J= | 8  | B= | 1.342557 |
| I= | 3  | J= | 4  | B= | 1.398564 |
| I= | 3  | J= | 11 | B= | 1.079738 |
| I= | 4  | J= | 5  | B= | 1.382019 |
| I= | 4  | J= | 10 | B= | 1.736460 |
| I= | 5  | J= | 6  | B= | 1.402541 |
| I= | 5  | J= | 9  | B= | 1.351242 |
| I= | 6  | J= | 7  | B= | 1.361232 |
| I= | 7  | J= | 14 | B= | 1.006026 |
| I= | 7  | J= | 15 | B= | 1.007656 |
| I= | 12 | J= | 13 | B= | 1.156359 |

|    |   |    |    |    |    |    |         |
|----|---|----|----|----|----|----|---------|
| I= | 1 | J= | 2  | K= | 3  | A= | 123.029 |
| I= | 1 | J= | 2  | K= | 8  | A= | 117.897 |
| I= | 1 | J= | 6  | K= | 7  | A= | 122.244 |
| I= | 1 | J= | 12 | K= | 13 | A= | 175.648 |
| I= | 2 | J= | 3  | K= | 4  | A= | 117.704 |
| I= | 2 | J= | 3  | K= | 11 | A= | 120.898 |
| I= | 3 | J= | 4  | K= | 5  | A= | 120.635 |
| I= | 3 | J= | 4  | K= | 10 | A= | 119.923 |
| I= | 4 | J= | 5  | K= | 6  | A= | 122.095 |
| I= | 4 | J= | 5  | K= | 9  | A= | 120.919 |
| I= | 5 | J= | 6  | K= | 7  | A= | 120.294 |
| I= | 6 | J= | 7  | K= | 14 | A= | 119.080 |
| I= | 6 | J= | 7  | K= | 15 | A= | 119.656 |

|    |   |    |   |    |   |    |    |    |         |
|----|---|----|---|----|---|----|----|----|---------|
| I= | 1 | J= | 2 | K= | 3 | L= | 4  | D= | 0.135   |
| I= | 1 | J= | 2 | K= | 3 | L= | 11 | D= | 179.978 |
| I= | 1 | J= | 6 | K= | 7 | L= | 14 | D= | 170.031 |
| I= | 1 | J= | 6 | K= | 7 | L= | 15 | D= | 11.149  |
| I= | 2 | J= | 3 | K= | 4 | L= | 5  | D= | 0.187   |
| I= | 2 | J= | 3 | K= | 4 | L= | 10 | D= | 179.753 |
| I= | 3 | J= | 4 | K= | 5 | L= | 6  | D= | 0.056   |
| I= | 3 | J= | 4 | K= | 5 | L= | 9  | D= | 179.802 |
| I= | 4 | J= | 5 | K= | 6 | L= | 7  | D= | 178.299 |
| I= | 5 | J= | 6 | K= | 7 | L= | 14 | D= | 11.392  |
| I= | 5 | J= | 6 | K= | 7 | L= | 15 | D= | 170.274 |



molE\_blyp

|    |    |    |    |    |          |
|----|----|----|----|----|----------|
| I= | 1  | J= | 2  | B= | 1.412270 |
| I= | 1  | J= | 6  | B= | 1.431157 |
| I= | 1  | J= | 12 | B= | 1.423840 |
| I= | 2  | J= | 3  | B= | 1.388010 |
| I= | 2  | J= | 8  | B= | 1.362241 |
| I= | 3  | J= | 4  | B= | 1.408617 |
| I= | 3  | J= | 11 | B= | 1.086387 |
| I= | 4  | J= | 5  | B= | 1.393729 |
| I= | 4  | J= | 10 | B= | 1.756430 |
| I= | 5  | J= | 6  | B= | 1.413938 |
| I= | 5  | J= | 9  | B= | 1.370589 |
| I= | 6  | J= | 7  | B= | 1.373626 |
| I= | 7  | J= | 14 | B= | 1.014038 |
| I= | 7  | J= | 15 | B= | 1.015557 |
| I= | 12 | J= | 13 | B= | 1.169735 |

|    |   |    |    |    |    |    |         |
|----|---|----|----|----|----|----|---------|
| I= | 1 | J= | 2  | K= | 3  | A= | 123.360 |
| I= | 1 | J= | 2  | K= | 8  | A= | 117.864 |
| I= | 1 | J= | 6  | K= | 7  | A= | 122.229 |
| I= | 1 | J= | 12 | K= | 13 | A= | 175.989 |
| I= | 2 | J= | 3  | K= | 4  | A= | 117.715 |
| I= | 2 | J= | 3  | K= | 11 | A= | 120.824 |
| I= | 3 | J= | 4  | K= | 5  | A= | 120.472 |
| I= | 3 | J= | 4  | K= | 10 | A= | 119.950 |
| I= | 4 | J= | 5  | K= | 6  | A= | 122.308 |
| I= | 4 | J= | 5  | K= | 9  | A= | 120.831 |
| I= | 5 | J= | 6  | K= | 7  | A= | 120.277 |
| I= | 6 | J= | 7  | K= | 14 | A= | 118.770 |
| I= | 6 | J= | 7  | K= | 15 | A= | 119.358 |

|    |   |    |   |    |   |    |    |    |         |
|----|---|----|---|----|---|----|----|----|---------|
| I= | 1 | J= | 2 | K= | 3 | L= | 4  | D= | 0.153   |
| I= | 1 | J= | 2 | K= | 3 | L= | 11 | D= | 179.957 |
| I= | 1 | J= | 6 | K= | 7 | L= | 14 | D= | 168.593 |
| I= | 1 | J= | 6 | K= | 7 | L= | 15 | D= | 13.029  |
| I= | 2 | J= | 3 | K= | 4 | L= | 5  | D= | 0.222   |
| I= | 2 | J= | 3 | K= | 4 | L= | 10 | D= | 179.698 |
| I= | 3 | J= | 4 | K= | 5 | L= | 6  | D= | 0.071   |
| I= | 3 | J= | 4 | K= | 5 | L= | 9  | D= | 179.769 |
| I= | 4 | J= | 5 | K= | 6 | L= | 7  | D= | 177.884 |
| I= | 5 | J= | 6 | K= | 7 | L= | 14 | D= | 13.180  |
| I= | 5 | J= | 6 | K= | 7 | L= | 15 | D= | 168.744 |

molE\_camb3lypd

|    |   |    |    |    |          |
|----|---|----|----|----|----------|
| I= | 1 | J= | 2  | B= | 1.393954 |
| I= | 1 | J= | 6  | B= | 1.407231 |
| I= | 1 | J= | 12 | B= | 1.420816 |
| I= | 2 | J= | 3  | B= | 1.371094 |
| I= | 2 | J= | 8  | B= | 1.335920 |
| I= | 3 | J= | 4  | B= | 1.393831 |
| I= | 3 | J= | 11 | B= | 1.079516 |
| I= | 4 | J= | 5  | B= | 1.375112 |
| I= | 4 | J= | 10 | B= | 1.727106 |

|    |    |    |    |    |          |
|----|----|----|----|----|----------|
| I= | 5  | J= | 6  | B= | 1.398239 |
| I= | 5  | J= | 9  | B= | 1.345253 |
| I= | 6  | J= | 7  | B= | 1.355191 |
| I= | 7  | J= | 14 | B= | 1.004828 |
| I= | 7  | J= | 15 | B= | 1.006312 |
| I= | 12 | J= | 13 | B= | 1.149536 |

|    |   |    |    |    |    |    |         |
|----|---|----|----|----|----|----|---------|
| I= | 1 | J= | 2  | K= | 3  | A= | 123.034 |
| I= | 1 | J= | 2  | K= | 8  | A= | 117.814 |
| I= | 1 | J= | 6  | K= | 7  | A= | 122.544 |
| I= | 1 | J= | 12 | K= | 13 | A= | 175.760 |
| I= | 2 | J= | 3  | K= | 4  | A= | 117.634 |
| I= | 2 | J= | 3  | K= | 11 | A= | 120.886 |
| I= | 3 | J= | 4  | K= | 5  | A= | 120.599 |
| I= | 3 | J= | 4  | K= | 10 | A= | 120.042 |
| I= | 4 | J= | 5  | K= | 6  | A= | 122.178 |
| I= | 4 | J= | 5  | K= | 9  | A= | 120.958 |
| I= | 5 | J= | 6  | K= | 7  | A= | 120.111 |
| I= | 6 | J= | 7  | K= | 14 | A= | 119.797 |
| I= | 6 | J= | 7  | K= | 15 | A= | 120.585 |

|    |   |    |   |    |   |    |    |    |         |
|----|---|----|---|----|---|----|----|----|---------|
| I= | 1 | J= | 2 | K= | 3 | L= | 4  | D= | 0.063   |
| I= | 1 | J= | 2 | K= | 3 | L= | 11 | D= | 179.990 |
| I= | 1 | J= | 6 | K= | 7 | L= | 14 | D= | 175.321 |
| I= | 1 | J= | 6 | K= | 7 | L= | 15 | D= | 5.298   |
| I= | 2 | J= | 3 | K= | 4 | L= | 5  | D= | 0.084   |
| I= | 2 | J= | 3 | K= | 4 | L= | 10 | D= | 179.887 |
| I= | 3 | J= | 4 | K= | 5 | L= | 6  | D= | 0.031   |
| I= | 3 | J= | 4 | K= | 5 | L= | 9  | D= | 179.895 |
| I= | 4 | J= | 5 | K= | 6 | L= | 7  | D= | 179.249 |
| I= | 5 | J= | 6 | K= | 7 | L= | 14 | D= | 5.299   |
| I= | 5 | J= | 6 | K= | 7 | L= | 15 | D= | 175.323 |

mo1E\_m062x

|    |    |    |    |    |          |
|----|----|----|----|----|----------|
| I= | 1  | J= | 2  | B= | 1.395964 |
| I= | 1  | J= | 6  | B= | 1.408085 |
| I= | 1  | J= | 12 | B= | 1.425243 |
| I= | 2  | J= | 3  | B= | 1.374712 |
| I= | 2  | J= | 8  | B= | 1.331794 |
| I= | 3  | J= | 4  | B= | 1.396563 |
| I= | 3  | J= | 11 | B= | 1.080248 |
| I= | 4  | J= | 5  | B= | 1.378158 |
| I= | 4  | J= | 10 | B= | 1.724601 |
| I= | 5  | J= | 6  | B= | 1.400541 |
| I= | 5  | J= | 9  | B= | 1.340176 |
| I= | 6  | J= | 7  | B= | 1.359039 |
| I= | 7  | J= | 14 | B= | 1.006421 |
| I= | 7  | J= | 15 | B= | 1.008124 |
| I= | 12 | J= | 13 | B= | 1.151087 |

|    |   |    |    |    |    |    |         |
|----|---|----|----|----|----|----|---------|
| I= | 1 | J= | 2  | K= | 3  | A= | 122.828 |
| I= | 1 | J= | 2  | K= | 8  | A= | 117.835 |
| I= | 1 | J= | 6  | K= | 7  | A= | 122.540 |
| I= | 1 | J= | 12 | K= | 13 | A= | 175.654 |
| I= | 2 | J= | 3  | K= | 4  | A= | 117.560 |

|    |   |    |   |    |    |    |         |
|----|---|----|---|----|----|----|---------|
| I= | 2 | J= | 3 | K= | 11 | A= | 120.935 |
| I= | 3 | J= | 4 | K= | 5  | A= | 120.793 |
| I= | 3 | J= | 4 | K= | 10 | A= | 120.124 |
| I= | 4 | J= | 5 | K= | 6  | A= | 122.002 |
| I= | 4 | J= | 5 | K= | 9  | A= | 121.010 |
| I= | 5 | J= | 6 | K= | 7  | A= | 120.122 |
| I= | 6 | J= | 7 | K= | 14 | A= | 118.852 |
| I= | 6 | J= | 7 | K= | 15 | A= | 119.471 |

|    |   |    |   |    |   |    |    |    |         |
|----|---|----|---|----|---|----|----|----|---------|
| I= | 1 | J= | 2 | K= | 3 | L= | 4  | D= | 0.140   |
| I= | 1 | J= | 2 | K= | 3 | L= | 11 | D= | 179.983 |
| I= | 1 | J= | 6 | K= | 7 | L= | 14 | D= | 169.446 |
| I= | 1 | J= | 6 | K= | 7 | L= | 15 | D= | 11.926  |
| I= | 2 | J= | 3 | K= | 4 | L= | 5  | D= | 0.185   |
| I= | 2 | J= | 3 | K= | 4 | L= | 10 | D= | 179.765 |
| I= | 3 | J= | 4 | K= | 5 | L= | 6  | D= | 0.022   |
| I= | 3 | J= | 4 | K= | 5 | L= | 9  | D= | 179.803 |
| I= | 4 | J= | 5 | K= | 6 | L= | 7  | D= | 178.254 |
| I= | 5 | J= | 6 | K= | 7 | L= | 14 | D= | 12.109  |
| I= | 5 | J= | 6 | K= | 7 | L= | 15 | D= | 169.629 |

molE\_mp2

|    |    |    |    |    |          |
|----|----|----|----|----|----------|
| I= | 1  | J= | 2  | B= | 1.401360 |
| I= | 1  | J= | 6  | B= | 1.413293 |
| I= | 1  | J= | 12 | B= | 1.426817 |
| I= | 2  | J= | 3  | B= | 1.384418 |
| I= | 2  | J= | 8  | B= | 1.342023 |
| I= | 3  | J= | 4  | B= | 1.401004 |
| I= | 3  | J= | 11 | B= | 1.083733 |
| I= | 4  | J= | 5  | B= | 1.391464 |
| I= | 4  | J= | 10 | B= | 1.721301 |
| I= | 5  | J= | 6  | B= | 1.402471 |
| I= | 5  | J= | 9  | B= | 1.344462 |
| I= | 6  | J= | 7  | B= | 1.379823 |
| I= | 7  | J= | 14 | B= | 1.010434 |
| I= | 7  | J= | 15 | B= | 1.011835 |
| I= | 12 | J= | 13 | B= | 1.178719 |

|    |   |    |    |    |    |    |         |
|----|---|----|----|----|----|----|---------|
| I= | 1 | J= | 2  | K= | 3  | A= | 122.393 |
| I= | 1 | J= | 2  | K= | 8  | A= | 118.168 |
| I= | 1 | J= | 6  | K= | 7  | A= | 121.915 |
| I= | 1 | J= | 12 | K= | 13 | A= | 175.791 |
| I= | 2 | J= | 3  | K= | 4  | A= | 118.154 |
| I= | 2 | J= | 3  | K= | 11 | A= | 120.566 |
| I= | 3 | J= | 4  | K= | 5  | A= | 120.010 |
| I= | 3 | J= | 4  | K= | 10 | A= | 120.398 |
| I= | 4 | J= | 5  | K= | 6  | A= | 122.151 |
| I= | 4 | J= | 5  | K= | 9  | A= | 120.586 |
| I= | 5 | J= | 6  | K= | 7  | A= | 120.272 |
| I= | 6 | J= | 7  | K= | 14 | A= | 115.666 |
| I= | 6 | J= | 7  | K= | 15 | A= | 116.109 |

|    |   |    |   |    |   |    |    |    |         |
|----|---|----|---|----|---|----|----|----|---------|
| I= | 1 | J= | 2 | K= | 3 | L= | 4  | D= | 4.422   |
| I= | 1 | J= | 2 | K= | 3 | L= | 11 | D= | 179.479 |
| I= | 1 | J= | 6 | K= | 7 | L= | 14 | D= | 162.659 |

|    |   |    |   |    |   |    |    |    |         |
|----|---|----|---|----|---|----|----|----|---------|
| I= | 1 | J= | 6 | K= | 7 | L= | 15 | D= | 24.831  |
| I= | 2 | J= | 3 | K= | 4 | L= | 5  | D= | 4.682   |
| I= | 2 | J= | 3 | K= | 4 | L= | 10 | D= | 179.460 |
| I= | 3 | J= | 4 | K= | 5 | L= | 6  | D= | 5.041   |
| I= | 3 | J= | 4 | K= | 5 | L= | 9  | D= | 179.165 |
| I= | 4 | J= | 5 | K= | 6 | L= | 7  | D= | 178.391 |
| I= | 5 | J= | 6 | K= | 7 | L= | 14 | D= | 23.975  |
| I= | 5 | J= | 6 | K= | 7 | L= | 15 | D= | 161.803 |

molE\_pbe0d

|    |    |    |    |    |          |
|----|----|----|----|----|----------|
| I= | 1  | J= | 2  | B= | 1.396576 |
| I= | 1  | J= | 6  | B= | 1.411244 |
| I= | 1  | J= | 12 | B= | 1.415758 |
| I= | 2  | J= | 3  | B= | 1.374216 |
| I= | 2  | J= | 8  | B= | 1.331059 |
| I= | 3  | J= | 4  | B= | 1.395503 |
| I= | 3  | J= | 11 | B= | 1.081111 |
| I= | 4  | J= | 5  | B= | 1.379593 |
| I= | 4  | J= | 10 | B= | 1.719879 |
| I= | 5  | J= | 6  | B= | 1.399411 |
| I= | 5  | J= | 9  | B= | 1.339862 |
| I= | 6  | J= | 7  | B= | 1.354828 |
| I= | 7  | J= | 14 | B= | 1.004879 |
| I= | 7  | J= | 15 | B= | 1.006728 |
| I= | 12 | J= | 13 | B= | 1.155738 |

|    |   |    |    |    |    |    |         |
|----|---|----|----|----|----|----|---------|
| I= | 1 | J= | 2  | K= | 3  | A= | 122.803 |
| I= | 1 | J= | 2  | K= | 8  | A= | 117.949 |
| I= | 1 | J= | 6  | K= | 7  | A= | 122.278 |
| I= | 1 | J= | 12 | K= | 13 | A= | 175.711 |
| I= | 2 | J= | 3  | K= | 4  | A= | 117.755 |
| I= | 2 | J= | 3  | K= | 11 | A= | 120.894 |
| I= | 3 | J= | 4  | K= | 5  | A= | 120.711 |
| I= | 3 | J= | 4  | K= | 10 | A= | 120.017 |
| I= | 4 | J= | 5  | K= | 6  | A= | 121.966 |
| I= | 4 | J= | 5  | K= | 9  | A= | 120.965 |
| I= | 5 | J= | 6  | K= | 7  | A= | 120.266 |
| I= | 6 | J= | 7  | K= | 14 | A= | 119.081 |
| I= | 6 | J= | 7  | K= | 15 | A= | 119.585 |

|    |   |    |   |    |   |    |    |    |         |
|----|---|----|---|----|---|----|----|----|---------|
| I= | 1 | J= | 2 | K= | 3 | L= | 4  | D= | 0.140   |
| I= | 1 | J= | 2 | K= | 3 | L= | 11 | D= | 179.982 |
| I= | 1 | J= | 6 | K= | 7 | L= | 14 | D= | 170.076 |
| I= | 1 | J= | 6 | K= | 7 | L= | 15 | D= | 10.867  |
| I= | 2 | J= | 3 | K= | 4 | L= | 5  | D= | 0.198   |
| I= | 2 | J= | 3 | K= | 4 | L= | 10 | D= | 179.756 |
| I= | 3 | J= | 4 | K= | 5 | L= | 6  | D= | 0.037   |
| I= | 3 | J= | 4 | K= | 5 | L= | 9  | D= | 179.814 |
| I= | 4 | J= | 5 | K= | 6 | L= | 7  | D= | 178.353 |
| I= | 5 | J= | 6 | K= | 7 | L= | 14 | D= | 11.312  |
| I= | 5 | J= | 6 | K= | 7 | L= | 15 | D= | 170.521 |

molE\_pbe

|    |   |    |   |    |          |
|----|---|----|---|----|----------|
| I= | 1 | J= | 2 | B= | 1.408444 |
|----|---|----|---|----|----------|

|    |    |    |    |    |          |
|----|----|----|----|----|----------|
| I= | 1  | J= | 6  | B= | 1.425708 |
| I= | 1  | J= | 12 | B= | 1.418299 |
| I= | 2  | J= | 3  | B= | 1.384939 |
| I= | 2  | J= | 8  | B= | 1.350088 |
| I= | 3  | J= | 4  | B= | 1.405086 |
| I= | 3  | J= | 11 | B= | 1.088575 |
| I= | 4  | J= | 5  | B= | 1.391300 |
| I= | 4  | J= | 10 | B= | 1.735714 |
| I= | 5  | J= | 6  | B= | 1.409886 |
| I= | 5  | J= | 9  | B= | 1.358466 |
| I= | 6  | J= | 7  | B= | 1.365339 |
| I= | 7  | J= | 14 | B= | 1.013772 |
| I= | 7  | J= | 15 | B= | 1.015704 |
| I= | 12 | J= | 13 | B= | 1.170668 |

|    |   |    |    |    |    |    |         |
|----|---|----|----|----|----|----|---------|
| I= | 1 | J= | 2  | K= | 3  | A= | 123.075 |
| I= | 1 | J= | 2  | K= | 8  | A= | 117.892 |
| I= | 1 | J= | 6  | K= | 7  | A= | 122.149 |
| I= | 1 | J= | 12 | K= | 13 | A= | 175.678 |
| I= | 2 | J= | 3  | K= | 4  | A= | 117.789 |
| I= | 2 | J= | 3  | K= | 11 | A= | 120.854 |
| I= | 3 | J= | 4  | K= | 5  | A= | 120.561 |
| I= | 3 | J= | 4  | K= | 10 | A= | 120.095 |
| I= | 4 | J= | 5  | K= | 6  | A= | 122.133 |
| I= | 4 | J= | 5  | K= | 9  | A= | 120.892 |
| I= | 5 | J= | 6  | K= | 7  | A= | 120.340 |
| I= | 6 | J= | 7  | K= | 14 | A= | 118.863 |
| I= | 6 | J= | 7  | K= | 15 | A= | 119.271 |

|    |   |    |   |    |   |    |    |    |         |
|----|---|----|---|----|---|----|----|----|---------|
| I= | 1 | J= | 2 | K= | 3 | L= | 4  | D= | 0.159   |
| I= | 1 | J= | 2 | K= | 3 | L= | 11 | D= | 179.963 |
| I= | 1 | J= | 6 | K= | 7 | L= | 14 | D= | 168.921 |
| I= | 1 | J= | 6 | K= | 7 | L= | 15 | D= | 12.177  |
| I= | 2 | J= | 3 | K= | 4 | L= | 5  | D= | 0.238   |
| I= | 2 | J= | 3 | K= | 4 | L= | 10 | D= | 179.699 |
| I= | 3 | J= | 4 | K= | 5 | L= | 6  | D= | 0.052   |
| I= | 3 | J= | 4 | K= | 5 | L= | 9  | D= | 179.786 |
| I= | 4 | J= | 5 | K= | 6 | L= | 7  | D= | 178.020 |
| I= | 5 | J= | 6 | K= | 7 | L= | 14 | D= | 12.720  |
| I= | 5 | J= | 6 | K= | 7 | L= | 15 | D= | 169.464 |

molE\_rtpss

|    |   |    |    |    |          |
|----|---|----|----|----|----------|
| I= | 1 | J= | 2  | B= | 1.405772 |
| I= | 1 | J= | 6  | B= | 1.421991 |
| I= | 1 | J= | 12 | B= | 1.419302 |
| I= | 2 | J= | 3  | B= | 1.383336 |
| I= | 2 | J= | 8  | B= | 1.351538 |
| I= | 3 | J= | 4  | B= | 1.403624 |
| I= | 3 | J= | 11 | B= | 1.084531 |
| I= | 4 | J= | 5  | B= | 1.388544 |
| I= | 4 | J= | 10 | B= | 1.736442 |
| I= | 5 | J= | 6  | B= | 1.405373 |
| I= | 5 | J= | 9  | B= | 1.359500 |
| I= | 6 | J= | 7  | B= | 1.371173 |
| I= | 7 | J= | 14 | B= | 1.013922 |

|    |    |    |    |    |    |          |         |    |         |
|----|----|----|----|----|----|----------|---------|----|---------|
| I= | 7  | J= | 15 |    | B= | 1.015659 |         |    |         |
| I= | 12 | J= | 13 |    | B= | 1.168449 |         |    |         |
| I= | 1  | J= | 2  | K= | 3  | A=       | 123.327 |    |         |
| I= | 1  | J= | 2  | K= | 8  | A=       | 117.705 |    |         |
| I= | 1  | J= | 6  | K= | 7  | A=       | 122.192 |    |         |
| I= | 1  | J= | 12 | K= | 13 | A=       | 175.836 |    |         |
| I= | 2  | J= | 3  | K= | 4  | A=       | 117.416 |    |         |
| I= | 2  | J= | 3  | K= | 11 | A=       | 121.116 |    |         |
| I= | 3  | J= | 4  | K= | 5  | A=       | 120.665 |    |         |
| I= | 3  | J= | 4  | K= | 10 | A=       | 120.094 |    |         |
| I= | 4  | J= | 5  | K= | 6  | A=       | 122.254 |    |         |
| I= | 4  | J= | 5  | K= | 9  | A=       | 120.786 |    |         |
| I= | 5  | J= | 6  | K= | 7  | A=       | 120.323 |    |         |
| I= | 6  | J= | 7  | K= | 14 | A=       | 117.157 |    |         |
| I= | 6  | J= | 7  | K= | 15 | A=       | 117.646 |    |         |
| I= | 1  | J= | 2  | K= | 3  | L=       | 4       | D= | 0.245   |
| I= | 1  | J= | 2  | K= | 3  | L=       | 11      | D= | 179.959 |
| I= | 1  | J= | 6  | K= | 7  | L=       | 14      | D= | 163.914 |
| I= | 1  | J= | 6  | K= | 7  | L=       | 15      | D= | 18.149  |
| I= | 2  | J= | 3  | K= | 4  | L=       | 5       | D= | 0.354   |
| I= | 2  | J= | 3  | K= | 4  | L=       | 10      | D= | 179.558 |
| I= | 3  | J= | 4  | K= | 5  | L=       | 6       | D= | 0.006   |
| I= | 3  | J= | 4  | K= | 5  | L=       | 9       | D= | 179.704 |
| I= | 4  | J= | 5  | K= | 6  | L=       | 7       | D= | 176.944 |
| I= | 5  | J= | 6  | K= | 7  | L=       | 14      | D= | 18.797  |
| I= | 5  | J= | 6  | K= | 7  | L=       | 15      | D= | 164.561 |

molE\_wb97xd

|    |    |    |    |    |    |          |         |
|----|----|----|----|----|----|----------|---------|
| I= | 1  | J= | 2  |    | B= | 1.396370 |         |
| I= | 1  | J= | 6  |    | B= | 1.409084 |         |
| I= | 1  | J= | 12 |    | B= | 1.422692 |         |
| I= | 2  | J= | 3  |    | B= | 1.373886 |         |
| I= | 2  | J= | 8  |    | B= | 1.332649 |         |
| I= | 3  | J= | 4  |    | B= | 1.395320 |         |
| I= | 3  | J= | 11 |    | B= | 1.080364 |         |
| I= | 4  | J= | 5  |    | B= | 1.378402 |         |
| I= | 4  | J= | 10 |    | B= | 1.728794 |         |
| I= | 5  | J= | 6  |    | B= | 1.400887 |         |
| I= | 5  | J= | 9  |    | B= | 1.342022 |         |
| I= | 6  | J= | 7  |    | B= | 1.358091 |         |
| I= | 7  | J= | 14 |    | B= | 1.004538 |         |
| I= | 7  | J= | 15 |    | B= | 1.006284 |         |
| I= | 12 | J= | 13 |    | B= | 1.152536 |         |
| I= | 1  | J= | 2  | K= | 3  | A=       | 122.834 |
| I= | 1  | J= | 2  | K= | 8  | A=       | 117.987 |
| I= | 1  | J= | 6  | K= | 7  | A=       | 122.404 |
| I= | 1  | J= | 12 | K= | 13 | A=       | 175.877 |
| I= | 2  | J= | 3  | K= | 4  | A=       | 117.710 |
| I= | 2  | J= | 3  | K= | 11 | A=       | 120.856 |
| I= | 3  | J= | 4  | K= | 5  | A=       | 120.715 |
| I= | 3  | J= | 4  | K= | 10 | A=       | 119.885 |
| I= | 4  | J= | 5  | K= | 6  | A=       | 121.987 |

|    |   |    |   |    |    |    |         |    |         |
|----|---|----|---|----|----|----|---------|----|---------|
| I= | 4 | J= | 5 | K= | 9  | A= | 120.988 |    |         |
| I= | 5 | J= | 6 | K= | 7  | A= | 120.193 |    |         |
| I= | 6 | J= | 7 | K= | 14 | A= | 119.274 |    |         |
| I= | 6 | J= | 7 | K= | 15 | A= | 119.899 |    |         |
|    |   |    |   |    |    |    |         |    |         |
| I= | 1 | J= | 2 | K= | 3  | L= | 4       | D= | 0.130   |
| I= | 1 | J= | 2 | K= | 3  | L= | 11      | D= | 179.978 |
| I= | 1 | J= | 6 | K= | 7  | L= | 14      | D= | 170.886 |
| I= | 1 | J= | 6 | K= | 7  | L= | 15      | D= | 10.253  |
| I= | 2 | J= | 3 | K= | 4  | L= | 5       | D= | 0.168   |
| I= | 2 | J= | 3 | K= | 4  | L= | 10      | D= | 179.795 |
| I= | 3 | J= | 4 | K= | 5  | L= | 6       | D= | 0.027   |
| I= | 3 | J= | 4 | K= | 5  | L= | 9       | D= | 179.824 |
| I= | 4 | J= | 5 | K= | 6  | L= | 7       | D= | 178.487 |
| I= | 5 | J= | 6 | K= | 7  | L= | 14      | D= | 10.437  |
| I= | 5 | J= | 6 | K= | 7  | L= | 15      | D= | 171.070 |

molE\_x3lyp

|    |    |    |    |    |          |
|----|----|----|----|----|----------|
| I= | 1  | J= | 2  | B= | 1.399910 |
| I= | 1  | J= | 6  | B= | 1.416013 |
| I= | 1  | J= | 12 | B= | 1.419730 |
| I= | 2  | J= | 3  | B= | 1.376746 |
| I= | 2  | J= | 8  | B= | 1.341386 |
| I= | 3  | J= | 4  | B= | 1.398239 |
| I= | 3  | J= | 11 | B= | 1.079958 |
| I= | 4  | J= | 5  | B= | 1.381518 |
| I= | 4  | J= | 10 | B= | 1.736520 |
| I= | 5  | J= | 6  | B= | 1.402837 |
| I= | 5  | J= | 9  | B= | 1.350313 |
| I= | 6  | J= | 7  | B= | 1.360881 |
| I= | 7  | J= | 14 | B= | 1.005910 |
| I= | 7  | J= | 15 | B= | 1.007407 |
| I= | 12 | J= | 13 | B= | 1.155718 |

|    |   |    |    |    |    |    |         |
|----|---|----|----|----|----|----|---------|
| I= | 1 | J= | 2  | K= | 3  | A= | 123.107 |
| I= | 1 | J= | 2  | K= | 8  | A= | 117.889 |
| I= | 1 | J= | 6  | K= | 7  | A= | 122.403 |
| I= | 1 | J= | 12 | K= | 13 | A= | 175.960 |
| I= | 2 | J= | 3  | K= | 4  | A= | 117.713 |
| I= | 2 | J= | 3  | K= | 11 | A= | 120.821 |
| I= | 3 | J= | 4  | K= | 5  | A= | 120.554 |
| I= | 3 | J= | 4  | K= | 10 | A= | 119.994 |
| I= | 4 | J= | 5  | K= | 6  | A= | 122.199 |
| I= | 4 | J= | 5  | K= | 9  | A= | 120.900 |
| I= | 5 | J= | 6  | K= | 7  | A= | 120.167 |
| I= | 6 | J= | 7  | K= | 14 | A= | 119.234 |
| I= | 6 | J= | 7  | K= | 15 | A= | 119.914 |

|    |   |    |   |    |   |    |    |    |         |
|----|---|----|---|----|---|----|----|----|---------|
| I= | 1 | J= | 2 | K= | 3 | L= | 4  | D= | 0.122   |
| I= | 1 | J= | 2 | K= | 3 | L= | 11 | D= | 179.979 |
| I= | 1 | J= | 6 | K= | 7 | L= | 14 | D= | 170.816 |
| I= | 1 | J= | 6 | K= | 7 | L= | 15 | D= | 10.426  |
| I= | 2 | J= | 3 | K= | 4 | L= | 5  | D= | 0.168   |
| I= | 2 | J= | 3 | K= | 4 | L= | 10 | D= | 179.777 |
| I= | 3 | J= | 4 | K= | 5 | L= | 6  | D= | 0.053   |

|    |   |    |   |    |   |    |    |    |         |
|----|---|----|---|----|---|----|----|----|---------|
| I= | 3 | J= | 4 | K= | 5 | L= | 9  | D= | 179.819 |
| I= | 4 | J= | 5 | K= | 6 | L= | 7  | D= | 178.414 |
| I= | 5 | J= | 6 | K= | 7 | L= | 14 | D= | 10.521  |
| I= | 5 | J= | 6 | K= | 7 | L= | 15 | D= | 170.911 |



Performance of the different levels of theory. Standard deviations (std dev), intercepts ( $a_0$ ), slopes ( $a_1$ ) and correlation coefficients ( $R^2$ ) as obtained upon least squares linear regression of the computed values of the internal coordinates (bond distances, B; bond angles, A; and dihedral angles, D) vs the experimental values.

|          |               | APF[D]  | B3LYP[D] | BLYP    | CAM-B3LYP[D] | M06-2X   | PBE     | PBE0[D] | RevTPSS | wB97-X[D] | X3LYP   | MP2     |
|----------|---------------|---------|----------|---------|--------------|----------|---------|---------|---------|-----------|---------|---------|
| B (N=49) | std dev / A   | 0.01198 | 0.01142  | 0.02132 | 0.00957      | 0.01163  | 0.01231 | 0.01716 | 0.01606 | 0.01141   | 0.01132 | 0.01767 |
|          | $a_0$ / A     | 0.02658 | 0.00968  | 0.02734 | -0.00174     | -0.00240 | 0.02556 | 0.05634 | 0.05421 | -0.00041  | 0.00534 | 0.10309 |
|          | $a_1$         | 0.98166 | 0.99655  | 0.99350 | 1.00084      | 1.00199  | 0.98098 | 0.96782 | 0.96879 | 1.00074   | 0.99947 | 0.93122 |
|          | $R^2$         | 0.99036 | 0.99287  | 0.99280 | 0.99386      | 0.99097  | 0.98965 | 0.99077 | 0.99192 | 0.99129   | 0.99284 | 0.98543 |
| A (N=41) | std dev / deg | 1.0     | 1.0      | 0.9     | 0.9          | 1.0      | 1.0     | 1.0     | 0.9     | 1.0       | 0.9     | 1.1     |
|          | $a_0$ / deg   | -0.8    | -0.8     | -1.0    | -0.8         | -0.7     | -0.7    | -0.8    | -1.0    | -0.8      | -0.9    | -0.7    |
|          | $a_1$         | 1.00697 | 1.00676  | 1.00883 | 1.00725      | 1.00656  | 1.00666 | 1.00722 | 1.00862 | 1.00707   | 1.00822 | 1.00592 |
|          | $R^2$         | 0.99841 | 0.99858  | 0.99878 | 0.99862      | 0.99848  | 0.99846 | 0.99858 | 0.99877 | 0.99855   | 0.99869 | 0.99823 |
| D (N=26) | std dev / deg | 1.0     | 1.0      | 1.0     | 0.9          | 1.0      | 1.0     | 1.0     | 1.1     | 1.0       | 0.9     | 2.5     |
|          | $a_0$ / deg   | -0.7    | -0.7     | -0.7    | -0.7         | -0.8     | -0.7    | -0.7    | -0.7    | -0.8      | -0.7    | 3.5     |
|          | $a_1$         | 1.00578 | 1.00543  | 1.00454 | 1.00691      | 1.00570  | 1.00557 | 1.00468 | 1.00311 | 1.00597   | 1.00568 | 0.97952 |
|          | $R^2$         | 0.99996 | 0.99996  | 0.99995 | 0.99997      | 0.99996  | 0.99996 | 0.99996 | 0.99994 | 0.99996   | 0.99996 | 0.99998 |

## Vibrational (IR) Spectra

molA\_apfd

| NM# | Symm | Wavenumber | Force Const | IR Intens |
|-----|------|------------|-------------|-----------|
| 1   | A'   | 89.0373    | 0.0467      | 0.2461    |
| 2   | A''  | 127.9496   | 0.1374      | 2.5479    |
| 3   | A''  | 133.9299   | 0.1922      | 0.0102    |
| 4   | A'   | 163.9163   | 0.1796      | 3.1550    |
| 5   | A'   | 202.9821   | 0.2135      | 0.7718    |
| 6   | A'   | 280.9726   | 0.7905      | 0.6529    |
| 7   | A''  | 293.7062   | 0.2248      | 4.4823    |
| 8   | A''  | 306.3018   | 0.5713      | 0.0013    |
| 9   | A'   | 315.5955   | 0.1478      | 114.7694  |
| 10  | A'   | 324.4423   | 0.7329      | 6.9373    |
| 11  | A'   | 337.9996   | 0.1411      | 189.2274  |
| 12  | A''  | 385.1084   | 0.2080      | 2.6381    |
| 13  | A'   | 426.8083   | 1.1194      | 0.3696    |
| 14  | A''  | 444.7844   | 0.2005      | 5.8120    |
| 15  | A''  | 448.4322   | 0.9515      | 0.3579    |
| 16  | A''  | 494.0204   | 1.8566      | 1.7939    |
| 17  | A'   | 505.5120   | 1.8118      | 1.2421    |
| 18  | A'   | 543.4931   | 2.7341      | 0.3718    |
| 19  | A'   | 608.9401   | 2.0985      | 3.7599    |
| 20  | A''  | 669.8482   | 3.2222      | 0.0001    |
| 21  | A'   | 676.0706   | 2.9465      | 0.7008    |
| 22  | A'   | 700.0101   | 3.4719      | 1.6393    |
| 23  | A''  | 776.6768   | 1.8814      | 0.2576    |
| 24  | A''  | 962.4248   | 2.4266      | 132.6404  |
| 25  | A'   | 982.2328   | 6.6677      | 67.6584   |
| 26  | A''  | 1150.4743  | 2.7952      | 67.2069   |
| 27  | A''  | 1197.7766  | 2.6697      | 63.8004   |
| 28  | A'   | 1202.8079  | 7.1918      | 38.8230   |
| 29  | A'   | 1339.7451  | 10.5260     | 79.5112   |
| 30  | A''  | 1385.4865  | 9.2921      | 8.2854    |
| 31  | A'   | 1485.4455  | 15.3661     | 16.4874   |
| 32  | A''  | 1556.4372  | 16.4319     | 387.3387  |
| 33  | A'   | 1567.8640  | 7.1522      | 189.7815  |
| 34  | A'   | 1648.6248  | 2.2501      | 77.9052   |
| 35  | A''  | 1653.0445  | 15.4376     | 0.0426    |
| 36  | A'   | 1713.8843  | 12.7023     | 325.5442  |
| 37  | A'   | 2363.1776  | 41.6665     | 62.2565   |
| 38  | A'   | 3628.1344  | 8.1122      | 144.6137  |
| 39  | A''  | 3746.8421  | 9.1358      | 72.1820   |

molA\_b3lypd

| NM# | Symm | Wavenumber | Force Const | IR Intens |
|-----|------|------------|-------------|-----------|
| 1   | A    | 88.6564    | 0.0465      | 0.2539    |
| 2   | A    | 128.8469   | 0.1394      | 2.5656    |
| 3   | A    | 133.4505   | 0.1908      | 0.0105    |
| 4   | A    | 163.2186   | 0.1792      | 3.3601    |

|    |   |           |         |          |
|----|---|-----------|---------|----------|
| 5  | A | 200.9637  | 0.2104  | 0.7525   |
| 6  | A | 280.2386  | 0.7921  | 0.5163   |
| 7  | A | 283.6422  | 0.1878  | 4.7295   |
| 8  | A | 304.5029  | 0.6873  | 0.0410   |
| 9  | A | 314.1839  | 0.2290  | 59.0118  |
| 10 | A | 319.8985  | 0.7825  | 4.2013   |
| 11 | A | 342.3812  | 0.1099  | 249.1826 |
| 12 | A | 381.7140  | 0.2446  | 2.0031   |
| 13 | A | 424.6830  | 1.0997  | 0.5502   |
| 14 | A | 438.9393  | 0.7926  | 3.7628   |
| 15 | A | 444.4561  | 0.1862  | 2.8547   |
| 16 | A | 486.7427  | 1.7867  | 2.0337   |
| 17 | A | 496.9664  | 1.7539  | 1.4296   |
| 18 | A | 535.0774  | 2.6335  | 0.3435   |
| 19 | A | 604.7164  | 2.0457  | 4.4040   |
| 20 | A | 663.2339  | 3.1602  | 0.0002   |
| 21 | A | 676.4771  | 3.0114  | 0.8898   |
| 22 | A | 711.4183  | 3.5541  | 1.4619   |
| 23 | A | 770.2073  | 1.8383  | 0.4614   |
| 24 | A | 948.6366  | 2.5671  | 145.1274 |
| 25 | A | 964.1115  | 6.4216  | 70.1421  |
| 26 | A | 1129.0585 | 4.0109  | 40.8217  |
| 27 | A | 1178.5936 | 2.0077  | 92.0120  |
| 28 | A | 1180.4033 | 7.0640  | 39.6241  |
| 29 | A | 1321.1120 | 10.6082 | 80.1976  |
| 30 | A | 1359.4501 | 8.2896  | 9.5948   |
| 31 | A | 1454.7420 | 14.6639 | 18.0074  |
| 32 | A | 1533.4692 | 15.9393 | 359.5697 |
| 33 | A | 1545.4508 | 8.9165  | 203.8877 |
| 34 | A | 1624.6167 | 14.2483 | 0.6211   |
| 35 | A | 1640.0189 | 2.1372  | 44.1533  |
| 36 | A | 1692.4814 | 10.8090 | 329.1365 |
| 37 | A | 2343.7001 | 40.9850 | 59.7491  |
| 38 | A | 3602.6308 | 7.9948  | 138.4320 |
| 39 | A | 3718.0345 | 8.9947  | 68.7276  |

-----

molA\_blyp

| NM# | Symm | Wavenumber | Force Const | IR Intens |
|-----|------|------------|-------------|-----------|
| 1   | A'   | 84.8267    | 0.0426      | 0.1757    |
| 2   | A''  | 125.8534   | 0.1330      | 2.2874    |
| 3   | A''  | 126.9759   | 0.1729      | 0.0191    |
| 4   | A'   | 156.1930   | 0.1593      | 3.7543    |
| 5   | A'   | 192.4205   | 0.2007      | 0.5907    |
| 6   | A'   | 271.5540   | 0.7560      | 0.1729    |
| 7   | A''  | 274.5232   | 0.1723      | 4.7540    |
| 8   | A''  | 293.7925   | 0.6638      | 0.0160    |
| 9   | A'   | 301.6430   | 0.4458      | 11.0276   |
| 10  | A'   | 307.7433   | 0.7750      | 2.5549    |
| 11  | A''  | 360.7353   | 0.2633      | 1.5628    |
| 12  | A'   | 362.6268   | 0.1025      | 292.1861  |
| 13  | A'   | 409.9442   | 0.9382      | 2.6008    |
| 14  | A''  | 422.7379   | 0.7427      | 3.5129    |
| 15  | A''  | 429.5068   | 0.1599      | 3.5914    |

ESI-75

|    |     |           |         |          |
|----|-----|-----------|---------|----------|
| 16 | A'' | 467.3433  | 1.6455  | 1.6864   |
| 17 | A'  | 471.8807  | 1.5866  | 1.3042   |
| 18 | A'  | 511.4122  | 2.3829  | 0.5782   |
| 19 | A'  | 581.4722  | 1.8468  | 6.7300   |
| 20 | A'' | 627.9576  | 2.8336  | 0.0016   |
| 21 | A'  | 645.9730  | 2.7466  | 0.9705   |
| 22 | A'  | 678.6818  | 3.2113  | 0.7502   |
| 23 | A'' | 741.2770  | 1.7410  | 0.5421   |
| 24 | A'' | 903.6965  | 2.6140  | 156.4382 |
| 25 | A'  | 923.6113  | 5.8981  | 69.0385  |
| 26 | A'' | 1069.3535 | 5.3768  | 20.6582  |
| 27 | A'  | 1126.3884 | 6.5828  | 30.4440  |
| 28 | A'' | 1133.7573 | 1.5443  | 107.3521 |
| 29 | A'  | 1251.5620 | 9.8381  | 80.7113  |
| 30 | A'' | 1319.7560 | 7.7093  | 21.9099  |
| 31 | A'  | 1378.7630 | 13.2095 | 17.3092  |
| 32 | A'' | 1456.4519 | 14.4225 | 309.2918 |
| 33 | A'  | 1478.8336 | 9.9305  | 168.8447 |
| 34 | A'' | 1540.4021 | 11.9330 | 1.9550   |
| 35 | A'  | 1587.9700 | 2.3524  | 2.6948   |
| 36 | A'  | 1622.6732 | 5.1306  | 318.8095 |
| 37 | A'  | 2232.7305 | 37.1825 | 52.3689  |
| 38 | A'  | 3497.7506 | 7.5345  | 118.3854 |
| 39 | A'' | 3608.1205 | 8.4650  | 57.6247  |

-----

molA\_camb3lypd

| NM# | Symm | Wavenumber | Force Const | IR Intens |
|-----|------|------------|-------------|-----------|
| 1   | A'   | 90.7606    | 0.0496      | 0.4013    |
| 2   | A''  | 129.7482   | 0.1415      | 2.7041    |
| 3   | A''  | 136.7347   | 0.2001      | 0.0068    |
| 4   | A'   | 165.1876   | 0.2310      | 1.5781    |
| 5   | A'   | 204.0335   | 0.1738      | 2.1163    |
| 6   | A'   | 264.0348   | 0.0515      | 283.1443  |
| 7   | A'   | 280.9128   | 0.6487      | 5.4564    |
| 8   | A''  | 282.9992   | 0.1898      | 4.6704    |
| 9   | A''  | 306.3433   | 0.6738      | 0.0494    |
| 10  | A'   | 324.0018   | 0.8511      | 1.7530    |
| 11  | A'   | 326.9418   | 0.8138      | 7.6617    |
| 12  | A''  | 393.3186   | 0.2571      | 1.4342    |
| 13  | A'   | 428.8062   | 1.1631      | 0.1249    |
| 14  | A''  | 444.5424   | 1.2690      | 2.6524    |
| 15  | A''  | 455.2128   | 0.1788      | 2.7611    |
| 16  | A''  | 492.9062   | 1.8282      | 2.4150    |
| 17  | A'   | 510.3983   | 1.8334      | 1.3384    |
| 18  | A'   | 542.8581   | 2.7339      | 0.1422    |
| 19  | A'   | 612.0666   | 2.1703      | 2.3676    |
| 20  | A''  | 681.2908   | 3.3351      | 0.0002    |
| 21  | A'   | 692.8184   | 3.1247      | 0.8506    |
| 22  | A'   | 734.4307   | 3.8030      | 2.2520    |
| 23  | A''  | 777.9371   | 1.8004      | 0.3481    |
| 24  | A''  | 964.1384   | 2.4024      | 129.4108  |
| 25  | A'   | 977.6021   | 6.5901      | 66.7408   |
| 26  | A''  | 1149.3776  | 2.8639      | 73.5353   |

ESI-76

|    |     |           |         |          |
|----|-----|-----------|---------|----------|
| 27 | A'' | 1191.2281 | 2.8741  | 66.5226  |
| 28 | A'  | 1202.2943 | 7.1493  | 49.0252  |
| 29 | A'  | 1348.9081 | 10.6273 | 76.4404  |
| 30 | A'' | 1353.8955 | 8.1574  | 3.5934   |
| 31 | A'  | 1489.1173 | 14.9711 | 22.0232  |
| 32 | A'' | 1569.2777 | 16.6697 | 380.2420 |
| 33 | A'  | 1574.5344 | 6.6375  | 195.1765 |
| 34 | A'  | 1649.9935 | 2.2476  | 135.4355 |
| 35 | A'' | 1669.4923 | 15.9428 | 0.0058   |
| 36 | A'  | 1728.6467 | 16.1073 | 328.5466 |
| 37 | A'  | 2405.5800 | 43.1949 | 59.0562  |
| 38 | A'  | 3632.5109 | 8.1267  | 162.2554 |
| 39 | A'' | 3750.0497 | 9.1592  | 80.8429  |

-----

molA\_m062x

-----

| NM# | Symm | Wavenumber | Force Const | IR Intens |
|-----|------|------------|-------------|-----------|
| 1   | A    | 90.5377    | 0.0476      | 0.2444    |
| 2   | A    | 126.2110   | 0.1339      | 2.5252    |
| 3   | A    | 137.0145   | 0.2011      | 0.0109    |
| 4   | A    | 167.1383   | 0.1772      | 4.0563    |
| 5   | A    | 203.3404   | 0.2178      | 0.8841    |
| 6   | A    | 278.2250   | 0.7815      | 0.4157    |
| 7   | A    | 282.3160   | 0.1935      | 4.3039    |
| 8   | A    | 305.3922   | 0.6581      | 0.0724    |
| 9   | A    | 320.2109   | 0.2901      | 43.8386   |
| 10  | A    | 324.3623   | 0.9134      | 1.3263    |
| 11  | A    | 358.2431   | 0.1129      | 288.7644  |
| 12  | A    | 386.0053   | 0.1611      | 4.6022    |
| 13  | A    | 425.6732   | 1.0724      | 1.2985    |
| 14  | A    | 439.0596   | 0.2420      | 5.4707    |
| 15  | A    | 442.2154   | 1.0629      | 0.3821    |
| 16  | A    | 492.2064   | 1.8256      | 1.9268    |
| 17  | A    | 507.9871   | 1.8392      | 1.5601    |
| 18  | A    | 544.7540   | 2.7120      | 0.5339    |
| 19  | A    | 611.0904   | 2.0179      | 4.7413    |
| 20  | A    | 664.5577   | 2.8652      | 0.0998    |
| 21  | A    | 670.7617   | 3.2267      | 0.0019    |
| 22  | A    | 689.9270   | 3.3802      | 2.3043    |
| 23  | A    | 774.7464   | 1.9076      | 0.2028    |
| 24  | A    | 974.8453   | 2.2681      | 120.7709  |
| 25  | A    | 981.6074   | 6.6346      | 63.7236   |
| 26  | A    | 1163.0808  | 2.2709      | 87.6981   |
| 27  | A    | 1207.8718  | 7.0706      | 50.4334   |
| 28  | A    | 1211.4179  | 4.0090      | 39.4252   |
| 29  | A    | 1357.5759  | 8.0886      | 1.2837    |
| 30  | A    | 1363.0869  | 10.4160     | 65.7276   |
| 31  | A    | 1505.8171  | 15.4862     | 16.2187   |
| 32  | A    | 1577.1824  | 6.4008      | 201.5722  |
| 33  | A    | 1585.5227  | 17.1690     | 403.5406  |
| 34  | A    | 1645.7227  | 2.2624      | 140.0882  |
| 35  | A    | 1681.3699  | 16.3931     | 0.0072    |
| 36  | A    | 1732.3040  | 16.4477     | 277.3790  |
| 37  | A    | 2416.1546  | 43.5810     | 52.3296   |

ESI-77

|    |   |           |        |          |
|----|---|-----------|--------|----------|
| 38 | A | 3621.2893 | 8.0815 | 156.4103 |
| 39 | A | 3740.7213 | 9.1047 | 81.6269  |

molA\_mp2

| NM# | Symm | Wavenumber | Force Const | IR Intens |
|-----|------|------------|-------------|-----------|
| 1   | A    | 89.7758    | 0.0474      | 0.2532    |
| 2   | A    | 120.9802   | 0.1231      | 2.2770    |
| 3   | A    | 133.3524   | 0.1908      | 0.0390    |
| 4   | A    | 165.4334   | 0.1461      | 5.2165    |
| 5   | A    | 208.4203   | 0.2599      | 1.1618    |
| 6   | A    | 279.7460   | 0.8007      | 0.0118    |
| 7   | A    | 284.9275   | 0.1810      | 3.9491    |
| 8   | A    | 304.6139   | 0.7805      | 0.1171    |
| 9   | A    | 316.2237   | 0.6137      | 4.1794    |
| 10  | A    | 322.3331   | 0.9253      | 1.7383    |
| 11  | A    | 358.1390   | 0.0943      | 14.4201   |
| 12  | A    | 422.3611   | 1.1719      | 0.2955    |
| 13  | A    | 424.2165   | 0.5028      | 2.6138    |
| 14  | A    | 431.6909   | 1.3160      | 1.8909    |
| 15  | A    | 452.1426   | 1.2322      | 2.7210    |
| 16  | A    | 476.1068   | 1.8238      | 1.2521    |
| 17  | A    | 536.5690   | 2.6110      | 0.0860    |
| 18  | A    | 577.9548   | 0.4287      | 209.0406  |
| 19  | A    | 616.6105   | 0.5887      | 141.5299  |
| 20  | A    | 656.4063   | 3.0992      | 0.0325    |
| 21  | A    | 669.9307   | 2.1580      | 31.6416   |
| 22  | A    | 763.7994   | 2.0803      | 0.2981    |
| 23  | A    | 800.8817   | 4.5052      | 1.0838    |
| 24  | A    | 961.4033   | 2.7861      | 146.7338  |
| 25  | A    | 963.3792   | 6.3879      | 60.5910   |
| 26  | A    | 1146.4657  | 4.4833      | 23.4861   |
| 27  | A    | 1172.7805  | 6.6891      | 49.1859   |
| 28  | A    | 1216.4914  | 1.7463      | 72.6141   |
| 29  | A    | 1331.6355  | 10.4994     | 55.3858   |
| 30  | A    | 1464.3250  | 11.2611     | 21.9391   |
| 31  | A    | 1480.5339  | 15.6917     | 4.3072    |
| 32  | A    | 1552.9034  | 15.8657     | 356.4172  |
| 33  | A    | 1558.9592  | 10.5678     | 169.5720  |
| 34  | A    | 1647.8989  | 2.0421      | 32.1507   |
| 35  | A    | 1657.4056  | 15.0045     | 0.9343    |
| 36  | A    | 1716.4169  | 11.8222     | 177.9475  |
| 37  | A    | 2187.5213  | 35.5235     | 1.7993    |
| 38  | A    | 3598.4596  | 7.9900      | 97.4071   |
| 39  | A    | 3715.9248  | 8.9557      | 54.8658   |

molA\_pbe0d

| NM# | Symm | Wavenumber | Force Const | IR Intens |
|-----|------|------------|-------------|-----------|
| 1   | A'   | 89.4767    | 0.0471      | 0.2474    |
| 2   | A''  | 127.8537   | 0.1375      | 2.5639    |
| 3   | A''  | 134.9206   | 0.1948      | 0.0111    |

|    |     |           |         |          |
|----|-----|-----------|---------|----------|
| 4  | A'  | 165.3275  | 0.1787  | 3.3967   |
| 5  | A'  | 203.8072  | 0.2165  | 0.8055   |
| 6  | A'  | 278.3603  | 0.7812  | 0.3199   |
| 7  | A'' | 280.2936  | 0.1824  | 4.6448   |
| 8  | A'' | 305.7471  | 0.6868  | 0.0435   |
| 9  | A'  | 319.0228  | 0.2369  | 59.7168  |
| 10 | A'  | 323.9912  | 0.8819  | 1.9181   |
| 11 | A'  | 349.2035  | 0.1133  | 255.5868 |
| 12 | A'' | 386.7164  | 0.2118  | 2.7496   |
| 13 | A'  | 425.6523  | 1.1116  | 0.5208   |
| 14 | A'' | 440.1417  | 0.9703  | 3.1439   |
| 15 | A'' | 446.6256  | 0.2010  | 3.1679   |
| 16 | A'' | 491.8229  | 1.8193  | 1.8056   |
| 17 | A'  | 506.2827  | 1.8240  | 1.4594   |
| 18 | A'  | 543.2156  | 2.7073  | 0.3801   |
| 19 | A'  | 611.1138  | 2.0815  | 4.0418   |
| 20 | A'' | 671.5864  | 3.2397  | 0.0001   |
| 21 | A'  | 678.4831  | 2.9892  | 0.6017   |
| 22 | A'  | 701.9168  | 3.4907  | 1.7038   |
| 23 | A'' | 776.3878  | 1.8700  | 0.2889   |
| 24 | A'' | 967.3225  | 2.3726  | 127.9228 |
| 25 | A'  | 982.4270  | 6.6779  | 63.8137  |
| 26 | A'' | 1155.2375 | 2.7953  | 69.1455  |
| 27 | A'' | 1201.6892 | 2.7915  | 61.4152  |
| 28 | A'  | 1205.9702 | 7.1807  | 41.2089  |
| 29 | A'  | 1348.9587 | 10.4961 | 80.5324  |
| 30 | A'' | 1395.5074 | 9.6446  | 9.2537   |
| 31 | A'  | 1491.8604 | 15.3585 | 14.5721  |
| 32 | A'' | 1570.9046 | 16.9053 | 394.9782 |
| 33 | A'  | 1576.5183 | 6.3133  | 175.4584 |
| 34 | A'  | 1646.5316 | 2.2857  | 110.8708 |
| 35 | A'' | 1662.7860 | 15.6527 | 0.2155   |
| 36 | A'  | 1725.7024 | 15.1609 | 311.2889 |
| 37 | A'  | 2373.8663 | 42.0311 | 63.5534  |
| 38 | A'  | 3637.2978 | 8.1522  | 143.1827 |
| 39 | A'' | 3756.9182 | 9.1827  | 72.9413  |

-----

molA\_pbe

| NM# | Symm | Wavenumber | Force Const | IR Intens |
|-----|------|------------|-------------|-----------|
| 1   | A'   | 84.9495    | 0.0427      | 0.1830    |
| 2   | A''  | 123.1825   | 0.1276      | 2.2722    |
| 3   | A''  | 127.7494   | 0.1747      | 0.0127    |
| 4   | A'   | 157.4074   | 0.1612      | 3.4828    |
| 5   | A'   | 193.4227   | 0.1999      | 0.5680    |
| 6   | A'   | 268.4021   | 0.7323      | 0.1372    |
| 7   | A''  | 270.4228   | 0.1668      | 4.7144    |
| 8   | A''  | 293.8780   | 0.6446      | 0.0084    |
| 9   | A'   | 303.7880   | 0.4268      | 13.4214   |
| 10  | A'   | 310.9351   | 0.7900      | 2.5636    |
| 11  | A'   | 362.0800   | 0.1027      | 289.4682  |
| 12  | A''  | 364.2722   | 0.2474      | 1.8090    |
| 13  | A'   | 409.7172   | 0.9748      | 1.7515    |
| 14  | A''  | 422.4947   | 0.9335      | 2.7345    |

ESI-79

|    |     |           |         |          |
|----|-----|-----------|---------|----------|
| 15 | A'' | 432.2333  | 0.1609  | 4.1507   |
| 16 | A'' | 470.4226  | 1.6629  | 1.3629   |
| 17 | A'  | 476.8512  | 1.6237  | 1.3246   |
| 18 | A'  | 520.1098  | 2.4665  | 0.5895   |
| 19 | A'  | 587.0206  | 1.8983  | 5.6546   |
| 20 | A'' | 633.1131  | 2.8817  | 0.0012   |
| 21 | A'  | 646.3503  | 2.7365  | 0.9732   |
| 22 | A'  | 666.1228  | 3.0986  | 0.6694   |
| 23 | A'' | 744.3786  | 1.7533  | 0.2739   |
| 24 | A'' | 920.5267  | 2.3615  | 136.0551 |
| 25 | A'  | 942.4810  | 6.1578  | 61.9954  |
| 26 | A'' | 1097.2063 | 3.7335  | 39.7034  |
| 27 | A'' | 1147.4654 | 1.8437  | 85.5215  |
| 28 | A'  | 1152.5504 | 6.7183  | 30.5859  |
| 29 | A'  | 1275.9520 | 9.7126  | 83.6226  |
| 30 | A'' | 1362.1939 | 9.3913  | 29.2239  |
| 31 | A'  | 1413.7559 | 13.9282 | 13.0510  |
| 32 | A'' | 1489.7251 | 15.3059 | 339.8830 |
| 33 | A'  | 1510.3727 | 7.2720  | 147.9963 |
| 34 | A'' | 1572.3097 | 13.3146 | 1.1421   |
| 35 | A'  | 1584.9306 | 2.0244  | 50.9664  |
| 36 | A'  | 1649.0223 | 11.5205 | 303.4848 |
| 37 | A'  | 2251.6229 | 37.7869 | 56.5187  |
| 38 | A'  | 3520.6820 | 7.6354  | 123.8321 |
| 39 | A'' | 3635.3885 | 8.5928  | 62.0953  |

-----

mola\_rtpss

-----

| NM# | Symm | Wavenumber | Force Const | IR Intens |
|-----|------|------------|-------------|-----------|
| 1   | A'   | 86.1679    | 0.0434      | 0.2171    |
| 2   | A''  | 121.0607   | 0.1237      | 2.2646    |
| 3   | A''  | 129.7010   | 0.1803      | 0.0178    |
| 4   | A'   | 160.4220   | 0.1517      | 5.0735    |
| 5   | A'   | 193.6839   | 0.2077      | 0.7006    |
| 6   | A'   | 259.9492   | 0.6873      | 0.0764    |
| 7   | A''  | 261.5662   | 0.1584      | 4.6061    |
| 8   | A''  | 288.1779   | 0.5684      | 0.0038    |
| 9   | A'   | 304.9509   | 0.5536      | 5.3108    |
| 10  | A'   | 309.5152   | 0.8463      | 1.3082    |
| 11  | A''  | 361.4914   | 0.1936      | 3.9563    |
| 12  | A'   | 410.1499   | 1.1098      | 3.4977    |
| 13  | A''  | 419.2258   | 0.3095      | 7.0159    |
| 14  | A''  | 423.9257   | 0.2890      | 1.4339    |
| 15  | A'   | 468.1260   | 0.2109      | 248.7644  |
| 16  | A''  | 471.1947   | 1.6933      | 1.0693    |
| 17  | A'   | 480.9672   | 0.6331      | 92.2636   |
| 18  | A'   | 522.8810   | 2.1472      | 6.9625    |
| 19  | A'   | 592.4678   | 1.4762      | 21.1413   |
| 20  | A''  | 627.6036   | 2.8284      | 0.0004    |
| 21  | A'   | 630.0603   | 2.7028      | 0.1860    |
| 22  | A'   | 644.5331   | 2.9485      | 0.9605    |
| 23  | A''  | 745.7079   | 1.8606      | 0.4625    |
| 24  | A''  | 927.7064   | 2.6429      | 157.4001  |
| 25  | A'   | 942.9322   | 6.1610      | 65.2259   |

ESI-80



|    |     |           |         |          |
|----|-----|-----------|---------|----------|
| 26 | A'' | 1103.4620 | 5.5367  | 18.0903  |
| 27 | A'  | 1150.4967 | 6.6088  | 30.3916  |
| 28 | A'' | 1167.0517 | 1.5876  | 94.3308  |
| 29 | A'  | 1279.3915 | 10.0682 | 76.5356  |
| 30 | A'' | 1368.8512 | 8.8235  | 22.1196  |
| 31 | A'  | 1420.6542 | 14.1404 | 16.0376  |
| 32 | A'' | 1499.8699 | 15.2455 | 339.1303 |
| 33 | A'  | 1516.2427 | 10.1166 | 166.2370 |
| 34 | A'' | 1590.3231 | 12.9132 | 1.8289   |
| 35 | A'  | 1621.7137 | 2.1842  | 9.3749   |
| 36 | A'  | 1666.2392 | 7.3705  | 282.8626 |
| 37 | A'  | 2265.8715 | 38.2743 | 54.5250  |
| 38 | A'  | 3508.4579 | 7.5864  | 82.6338  |
| 39 | A'' | 3618.7631 | 8.5023  | 45.2620  |

-----

molA\_wb97xd

| NM# | Symm | Wavenumber | Force Const | IR Intens |
|-----|------|------------|-------------|-----------|
| 1   | A'   | 89.7027    | 0.0471      | 0.2783    |
| 2   | A''  | 129.8423   | 0.1416      | 2.6310    |
| 3   | A''  | 135.0144   | 0.1955      | 0.0101    |
| 4   | A'   | 164.9677   | 0.1779      | 3.3187    |
| 5   | A'   | 205.4719   | 0.2226      | 0.8435    |
| 6   | A'   | 283.0600   | 0.7983      | 0.7116    |
| 7   | A''  | 284.8845   | 0.1872      | 4.4971    |
| 8   | A''  | 308.7914   | 0.7344      | 0.0650    |
| 9   | A'   | 317.5462   | 0.1559      | 111.5317  |
| 10  | A'   | 324.6960   | 0.9018      | 1.0554    |
| 11  | A'   | 341.1241   | 0.1354      | 206.0004  |
| 12  | A''  | 386.5603   | 0.1704      | 3.6023    |
| 13  | A'   | 427.3118   | 1.1171      | 0.4912    |
| 14  | A''  | 440.8442   | 0.2740      | 5.4902    |
| 15  | A''  | 443.7617   | 0.6265      | 0.0238    |
| 16  | A''  | 491.7112   | 1.8308      | 2.0548    |
| 17  | A'   | 507.6059   | 1.8283      | 1.3907    |
| 18  | A'   | 540.2016   | 2.6823      | 0.3589    |
| 19  | A'   | 610.2653   | 2.0791      | 4.0641    |
| 20  | A''  | 672.5122   | 3.2458      | 0.0017    |
| 21  | A'   | 677.6310   | 2.9634      | 0.3870    |
| 22  | A'   | 709.8404   | 3.5815      | 1.9624    |
| 23  | A''  | 778.7836   | 1.8752      | 0.3884    |
| 24  | A''  | 965.0936   | 2.4610      | 137.7952  |
| 25  | A'   | 974.6564   | 6.5852      | 66.4605   |
| 26  | A''  | 1151.6401  | 3.0828      | 61.8229   |
| 27  | A''  | 1194.9468  | 2.5799      | 69.3558   |
| 28  | A'   | 1198.4346  | 7.1213      | 46.8420   |
| 29  | A'   | 1344.7830  | 10.6224     | 76.0224   |
| 30  | A''  | 1359.4183  | 8.1089      | 2.0420    |
| 31  | A'   | 1486.3454  | 15.1102     | 18.6304   |
| 32  | A''  | 1565.8380  | 16.4860     | 397.8319  |
| 33  | A'   | 1572.0743  | 7.3870      | 202.3768  |
| 34  | A'   | 1652.5800  | 2.2007      | 97.6407   |
| 35  | A''  | 1667.9869  | 15.8141     | 0.0039    |
| 36  | A'   | 1725.6446  | 14.5372     | 319.5865  |

ESI-81

|    |     |           |         |          |
|----|-----|-----------|---------|----------|
| 37 | A'  | 2389.7028 | 42.6183 | 57.3586  |
| 38 | A'  | 3643.5794 | 8.1815  | 132.8983 |
| 39 | A'' | 3762.3613 | 9.2096  | 68.9535  |

molA\_x3lyp

| NM# | Symm | Wavenumber | Force Const | IR Intens |
|-----|------|------------|-------------|-----------|
| 1   | A'   | 89.3650    | 0.0473      | 0.2540    |
| 2   | A''  | 129.5162   | 0.1409      | 2.5667    |
| 3   | A''  | 134.2326   | 0.1930      | 0.0097    |
| 4   | A'   | 163.9244   | 0.1871      | 2.9544    |
| 5   | A'   | 202.1919   | 0.2104      | 0.7468    |
| 6   | A'   | 279.7884   | 0.7761      | 0.8770    |
| 7   | A''  | 282.2059   | 0.1856      | 4.6893    |
| 8   | A''  | 304.4015   | 0.6932      | 0.0486    |
| 9   | A'   | 312.3510   | 0.1242      | 140.0943  |
| 10  | A'   | 320.0104   | 0.8735      | 0.6057    |
| 11  | A'   | 332.6697   | 0.1514      | 167.7815  |
| 12  | A''  | 383.5979   | 0.2478      | 1.8656    |
| 13  | A'   | 424.4112   | 1.1123      | 0.3732    |
| 14  | A''  | 439.3572   | 0.9897      | 3.1639    |
| 15  | A''  | 446.3182   | 0.1788      | 3.1913    |
| 16  | A''  | 487.3462   | 1.7878      | 2.0799    |
| 17  | A'   | 499.9268   | 1.7675      | 1.2702    |
| 18  | A'   | 533.9064   | 2.6220      | 0.2519    |
| 19  | A'   | 604.6469   | 2.0641      | 3.9733    |
| 20  | A''  | 666.9944   | 3.1960      | 0.0003    |
| 21  | A'   | 679.9785   | 3.0277      | 1.0409    |
| 22  | A'   | 716.2800   | 3.5977      | 1.4702    |
| 23  | A''  | 770.8121   | 1.8267      | 0.4333    |
| 24  | A''  | 950.1273   | 2.5344      | 142.1285  |
| 25  | A'   | 964.1685   | 6.4254      | 69.2015   |
| 26  | A''  | 1130.8592  | 3.8858      | 43.6343   |
| 27  | A''  | 1179.4805  | 2.0707      | 91.2318   |
| 28  | A'   | 1181.3152  | 7.0665      | 41.1234   |
| 29  | A'   | 1322.1872  | 10.6169     | 79.7437   |
| 30  | A''  | 1358.5168  | 8.3142      | 8.9998    |
| 31  | A'   | 1455.8889  | 14.6543     | 18.4145   |
| 32  | A''  | 1536.1890  | 16.0086     | 363.7953  |
| 33  | A'   | 1547.4636  | 8.8305      | 206.8804  |
| 34  | A''  | 1627.9918  | 14.3994     | 0.5695    |
| 35  | A'   | 1641.7867  | 2.1385      | 48.4161   |
| 36  | A'   | 1695.2248  | 11.1412     | 333.9280  |
| 37  | A'   | 2348.7960  | 41.1696     | 60.1163   |
| 38  | A'   | 3606.7242  | 8.0131      | 143.5899  |
| 39  | A''  | 3722.5031  | 9.0177      | 70.6619   |

molB\_apfd

| NM# | Symm | Wavenumber | Force Const | IR Intens |
|-----|------|------------|-------------|-----------|
| 1   | A    | 87.7936    | 0.0433      | 0.1275    |
| 2   | A    | 130.5263   | 0.1373      | 2.2033    |

|    |   |           |         |          |
|----|---|-----------|---------|----------|
| 3  | A | 142.8679  | 0.1626  | 2.0068   |
| 4  | A | 203.7160  | 0.1974  | 1.1058   |
| 5  | A | 258.8573  | 0.2443  | 2.3868   |
| 6  | A | 290.8352  | 0.7289  | 2.5204   |
| 7  | A | 306.9786  | 0.2038  | 25.9783  |
| 8  | A | 321.6796  | 0.1186  | 122.7923 |
| 9  | A | 330.0418  | 0.2484  | 73.9297  |
| 10 | A | 369.5364  | 0.2613  | 75.1979  |
| 11 | A | 422.0083  | 0.1342  | 26.7762  |
| 12 | A | 423.6578  | 0.7916  | 2.2232   |
| 13 | A | 449.1691  | 1.4277  | 3.3978   |
| 14 | A | 490.1435  | 1.6434  | 1.0960   |
| 15 | A | 517.1020  | 1.7995  | 1.2352   |
| 16 | A | 598.8804  | 2.0929  | 3.5921   |
| 17 | A | 603.8412  | 0.7905  | 4.4318   |
| 18 | A | 686.5490  | 1.4971  | 8.5754   |
| 19 | A | 690.9255  | 3.1003  | 0.9162   |
| 20 | A | 696.9990  | 1.6627  | 3.9921   |
| 21 | A | 720.3986  | 2.9136  | 0.6545   |
| 22 | A | 829.5340  | 0.6126  | 30.7519  |
| 23 | A | 946.9549  | 4.0465  | 83.7525  |
| 24 | A | 1058.4082 | 1.4357  | 33.0046  |
| 25 | A | 1128.2414 | 2.3781  | 56.5036  |
| 26 | A | 1190.8235 | 4.4910  | 44.4112  |
| 27 | A | 1234.6391 | 1.3974  | 57.5526  |
| 28 | A | 1290.8113 | 8.7873  | 99.0467  |
| 29 | A | 1383.6985 | 9.4716  | 14.7170  |
| 30 | A | 1450.3711 | 7.9678  | 22.7179  |
| 31 | A | 1523.7952 | 12.2033 | 100.7055 |
| 32 | A | 1573.3477 | 7.3838  | 280.7452 |
| 33 | A | 1638.0959 | 14.1701 | 41.6330  |
| 34 | A | 1657.4039 | 2.1443  | 45.9247  |
| 35 | A | 1709.0908 | 11.6916 | 486.3857 |
| 36 | A | 2361.0315 | 41.5913 | 70.3131  |
| 37 | A | 3218.5482 | 6.6678  | 0.2516   |
| 38 | A | 3629.4419 | 8.1226  | 119.6942 |
| 39 | A | 3745.8925 | 9.1238  | 55.8920  |

-----

molB\_b31ypd

| NM# | Symm | Wavenumber | Force Const | IR Intens |
|-----|------|------------|-------------|-----------|
| 1   | A    | 87.4233    | 0.0431      | 0.1365    |
| 2   | A    | 131.4656   | 0.1393      | 2.2135    |
| 3   | A    | 142.5642   | 0.1616      | 2.1298    |
| 4   | A    | 202.0377   | 0.1966      | 0.8653    |
| 5   | A    | 258.4998   | 0.2441      | 2.7676    |
| 6   | A    | 288.2695   | 0.5567      | 2.2154    |
| 7   | A    | 301.5456   | 0.2416      | 4.0132    |
| 8   | A    | 321.6972   | 0.3319      | 22.6611   |
| 9   | A    | 331.4659   | 0.1186      | 139.9476  |
| 10  | A    | 372.2895   | 0.2335      | 118.6660  |
| 11  | A    | 421.7688   | 0.1347      | 41.7378   |
| 12  | A    | 424.3536   | 0.6273      | 5.9784    |
| 13  | A    | 448.9863   | 1.3924      | 4.0414    |

ESI-83

|    |   |           |         |          |
|----|---|-----------|---------|----------|
| 14 | A | 485.9215  | 1.6484  | 0.8932   |
| 15 | A | 508.2891  | 1.7325  | 1.4409   |
| 16 | A | 592.9562  | 2.0509  | 4.2998   |
| 17 | A | 597.5997  | 0.7825  | 3.7890   |
| 18 | A | 680.0232  | 1.3469  | 8.1123   |
| 19 | A | 687.5582  | 3.0242  | 1.2529   |
| 20 | A | 692.4485  | 1.8119  | 5.6713   |
| 21 | A | 725.5717  | 2.6776  | 0.3546   |
| 22 | A | 829.8971  | 0.6194  | 30.3828  |
| 23 | A | 932.0831  | 4.1352  | 89.2836  |
| 24 | A | 1048.5544 | 1.6962  | 46.1956  |
| 25 | A | 1113.5607 | 2.0859  | 44.1660  |
| 26 | A | 1172.9870 | 3.9262  | 49.0955  |
| 27 | A | 1226.6410 | 1.3997  | 65.7106  |
| 28 | A | 1273.7133 | 8.5787  | 98.2518  |
| 29 | A | 1357.4233 | 8.3488  | 13.5247  |
| 30 | A | 1429.0658 | 7.9023  | 26.1032  |
| 31 | A | 1502.5598 | 12.3147 | 100.0655 |
| 32 | A | 1552.5342 | 7.3532  | 272.0948 |
| 33 | A | 1614.2758 | 13.3067 | 34.6509  |
| 34 | A | 1651.0248 | 2.1131  | 21.2269  |
| 35 | A | 1688.8523 | 9.5581  | 478.1850 |
| 36 | A | 2341.6179 | 40.9125 | 67.8817  |
| 37 | A | 3204.7052 | 6.6082  | 0.1940   |
| 38 | A | 3602.1010 | 7.9972  | 111.4219 |
| 39 | A | 3714.5226 | 8.9697  | 51.8141  |

molB\_blyp

| NM# | Symm | Wavenumber | Force Const | IR Intens |
|-----|------|------------|-------------|-----------|
| 1   | A    | 83.7051    | 0.0398      | 0.1055    |
| 2   | A    | 128.4060   | 0.1329      | 1.9584    |
| 3   | A    | 136.1280   | 0.1474      | 2.1073    |
| 4   | A    | 193.7461   | 0.1871      | 0.5827    |
| 5   | A    | 248.9135   | 0.2286      | 2.4238    |
| 6   | A    | 278.9474   | 0.5278      | 1.3308    |
| 7   | A    | 291.2627   | 0.2249      | 2.0591    |
| 8   | A    | 310.2761   | 0.6202      | 1.7925    |
| 9   | A    | 326.7324   | 0.1475      | 58.6321   |
| 10  | A    | 373.5730   | 0.1550      | 167.0062  |
| 11  | A    | 409.0176   | 0.5650      | 5.8078    |
| 12  | A    | 414.8605   | 0.1287      | 95.0375   |
| 13  | A    | 432.4361   | 1.1742      | 5.7398    |
| 14  | A    | 466.9815   | 1.5402      | 0.8248    |
| 15  | A    | 484.1874   | 1.5679      | 1.0622    |
| 16  | A    | 567.2402   | 1.7799      | 5.3059    |
| 17  | A    | 567.6090   | 0.7310      | 3.6123    |
| 18  | A    | 654.6176   | 1.2461      | 8.5820    |
| 19  | A    | 655.7744   | 2.7995      | 1.1611    |
| 20  | A    | 668.6132   | 1.6897      | 6.3337    |
| 21  | A    | 690.0342   | 2.4278      | 0.0959    |
| 22  | A    | 792.6009   | 0.5571      | 26.9036   |
| 23  | A    | 891.2851   | 3.9743      | 93.7216   |
| 24  | A    | 1005.2232  | 2.2137      | 64.2187   |

|    |   |           |         |          |
|----|---|-----------|---------|----------|
| 25 | A | 1065.8435 | 1.7243  | 21.2395  |
| 26 | A | 1122.0277 | 2.8267  | 47.6570  |
| 27 | A | 1183.5761 | 1.3717  | 89.2975  |
| 28 | A | 1213.8436 | 6.6871  | 68.6440  |
| 29 | A | 1318.8221 | 7.5095  | 23.8630  |
| 30 | A | 1360.5859 | 6.7722  | 24.9998  |
| 31 | A | 1434.3764 | 11.5926 | 102.1989 |
| 32 | A | 1483.7734 | 6.7181  | 210.9343 |
| 33 | A | 1534.6898 | 11.2408 | 21.1729  |
| 34 | A | 1599.4042 | 2.7681  | 27.8098  |
| 35 | A | 1622.0936 | 3.6973  | 410.9224 |
| 36 | A | 2231.1401 | 37.1293 | 58.9684  |
| 37 | A | 3123.6954 | 6.2724  | 0.2555   |
| 38 | A | 3495.9639 | 7.5309  | 93.1633  |
| 39 | A | 3603.2426 | 8.4347  | 42.0950  |

-----

molB\_camb3lypd

| NM# | Symm | Wavenumber | Force Const | IR Intens |
|-----|------|------------|-------------|-----------|
| 1   | A    | 89.4895    | 0.0451      | 0.1424    |
| 2   | A    | 132.4652   | 0.1415      | 2.3399    |
| 3   | A    | 145.7143   | 0.1755      | 1.6403    |
| 4   | A    | 205.4215   | 0.1774      | 2.2683    |
| 5   | A    | 263.3740   | 0.2702      | 0.7705    |
| 6   | A    | 275.4544   | 0.0610      | 251.2965  |
| 7   | A    | 290.0298   | 0.4461      | 11.9076   |
| 8   | A    | 304.8313   | 0.2095      | 10.4756   |
| 9   | A    | 327.1320   | 0.8262      | 5.5971    |
| 10  | A    | 367.3684   | 0.3433      | 17.0136   |
| 11  | A    | 428.2342   | 1.0333      | 0.4400    |
| 12  | A    | 428.8112   | 0.1305      | 19.3457   |
| 13  | A    | 454.4503   | 1.4501      | 3.8964    |
| 14  | A    | 491.7543   | 1.6702      | 0.9982    |
| 15  | A    | 521.0428   | 1.7913      | 1.4602    |
| 16  | A    | 602.3939   | 2.1659      | 2.9492    |
| 17  | A    | 613.1231   | 0.8013      | 4.4576    |
| 18  | A    | 686.7128   | 1.3704      | 7.7456    |
| 19  | A    | 698.6497   | 1.7754      | 5.8624    |
| 20  | A    | 705.5852   | 3.2563      | 0.9129    |
| 21  | A    | 747.6310   | 2.6917      | 0.5026    |
| 22  | A    | 850.6549   | 0.6693      | 33.2516   |
| 23  | A    | 946.7363   | 4.1247      | 84.0458   |
| 24  | A    | 1058.5618  | 1.3755      | 28.3783   |
| 25  | A    | 1129.9773  | 2.5683      | 64.1074   |
| 26  | A    | 1192.5607  | 4.7963      | 50.9981   |
| 27  | A    | 1236.8644  | 1.4024      | 57.3958   |
| 28  | A    | 1295.6386  | 9.5737      | 109.9869  |
| 29  | A    | 1352.3837  | 8.2739      | 6.0795    |
| 30  | A    | 1456.7214  | 8.1045      | 29.7227   |
| 31  | A    | 1534.9033  | 12.2084     | 96.1228   |
| 32  | A    | 1583.3097  | 7.1166      | 296.7325  |
| 33  | A    | 1656.7625  | 12.7629     | 39.1299   |
| 34  | A    | 1659.5822  | 2.1526      | 102.7162  |
| 35  | A    | 1724.4843  | 14.7751     | 482.6404  |

|    |   |           |         |          |
|----|---|-----------|---------|----------|
| 36 | A | 2403.1469 | 43.1084 | 68.0165  |
| 37 | A | 3225.8906 | 6.7014  | 0.4196   |
| 38 | A | 3633.5782 | 8.1371  | 133.9310 |
| 39 | A | 3748.3895 | 9.1423  | 62.4502  |

molB\_m062x

| NM# | Symm | Wavenumber | Force Const | IR Intens |
|-----|------|------------|-------------|-----------|
| 1   | A    | 89.0821    | 0.0440      | 0.1482    |
| 2   | A    | 128.7147   | 0.1336      | 2.1770    |
| 3   | A    | 145.7918   | 0.1659      | 2.2488    |
| 4   | A    | 204.4885   | 0.2009      | 1.1874    |
| 5   | A    | 260.4790   | 0.2385      | 3.6949    |
| 6   | A    | 288.1094   | 0.6266      | 2.9524    |
| 7   | A    | 303.3700   | 0.2321      | 9.2413    |
| 8   | A    | 324.3699   | 0.2229      | 42.6878   |
| 9   | A    | 334.2195   | 0.1339      | 125.6752  |
| 10  | A    | 377.7007   | 0.2463      | 117.7205  |
| 11  | A    | 415.1536   | 0.1279      | 52.2933   |
| 12  | A    | 425.0951   | 0.9468      | 2.0049    |
| 13  | A    | 452.1033   | 1.4362      | 3.9177    |
| 14  | A    | 490.8115   | 1.6563      | 0.9337    |
| 15  | A    | 518.4801   | 1.8236      | 1.6542    |
| 16  | A    | 603.0276   | 2.0789      | 4.3158    |
| 17  | A    | 608.7628   | 0.8381      | 3.7314    |
| 18  | A    | 686.2825   | 1.3733      | 6.3643    |
| 19  | A    | 689.3260   | 3.0019      | 1.0390    |
| 20  | A    | 693.8365   | 1.8405      | 5.0584    |
| 21  | A    | 712.0050   | 3.0644      | 1.4912    |
| 22  | A    | 839.2626   | 0.6127      | 33.1391   |
| 23  | A    | 950.6577   | 3.8547      | 75.7080   |
| 24  | A    | 1063.2462  | 1.2971      | 25.9092   |
| 25  | A    | 1141.9812  | 2.6030      | 64.7002   |
| 26  | A    | 1200.1683  | 5.0685      | 47.4526   |
| 27  | A    | 1232.3753  | 1.4071      | 51.3405   |
| 28  | A    | 1307.2117  | 9.2932      | 101.8777  |
| 29  | A    | 1355.7379  | 8.2047      | 3.4268    |
| 30  | A    | 1468.7780  | 8.4113      | 29.6083   |
| 31  | A    | 1542.7596  | 11.4972     | 72.5879   |
| 32  | A    | 1589.1769  | 7.7359      | 340.9415  |
| 33  | A    | 1654.5077  | 2.1104      | 93.9298   |
| 34  | A    | 1665.7810  | 14.9837     | 56.9174   |
| 35  | A    | 1726.2251  | 15.1693     | 429.6680  |
| 36  | A    | 2413.6305  | 43.4909     | 60.6513   |
| 37  | A    | 3236.4030  | 6.7449      | 1.0545    |
| 38  | A    | 3625.2130  | 8.1044      | 131.0635  |
| 39  | A    | 3742.9475  | 9.1076      | 64.3869   |

molB\_mp2

| NM# | Symm | Wavenumber | Force Const | IR Intens |
|-----|------|------------|-------------|-----------|
| 1   | A    | 88.3639    | 0.0441      | 0.1901    |

|    |   |           |         |          |
|----|---|-----------|---------|----------|
| 2  | A | 123.4826  | 0.1232  | 1.9794   |
| 3  | A | 142.0279  | 0.1523  | 2.2441   |
| 4  | A | 206.6204  | 0.2169  | 0.8651   |
| 5  | A | 255.4759  | 0.2439  | 3.5329   |
| 6  | A | 288.2996  | 0.6032  | 0.6354   |
| 7  | A | 299.3233  | 0.2349  | 0.9874   |
| 8  | A | 320.6544  | 0.3929  | 0.8727   |
| 9  | A | 330.9888  | 0.0954  | 21.3278  |
| 10 | A | 382.6418  | 0.2976  | 5.1378   |
| 11 | A | 421.1249  | 1.0870  | 0.4836   |
| 12 | A | 437.2046  | 1.3072  | 3.3994   |
| 13 | A | 464.1912  | 1.1977  | 2.2901   |
| 14 | A | 480.1021  | 1.7226  | 0.2596   |
| 15 | A | 572.9705  | 0.5714  | 123.1453 |
| 16 | A | 584.1413  | 1.3583  | 0.8813   |
| 17 | A | 613.0733  | 0.4133  | 222.2547 |
| 18 | A | 666.0442  | 2.0848  | 34.8959  |
| 19 | A | 677.3451  | 1.2139  | 5.8284   |
| 20 | A | 691.0256  | 1.8850  | 18.3091  |
| 21 | A | 756.1413  | 2.1533  | 0.3859   |
| 22 | A | 843.3096  | 0.6252  | 32.3564  |
| 23 | A | 931.8807  | 3.9246  | 80.2731  |
| 24 | A | 1060.1354 | 2.3591  | 72.1353  |
| 25 | A | 1132.8758 | 1.9797  | 17.4609  |
| 26 | A | 1176.1622 | 2.5367  | 54.4983  |
| 27 | A | 1230.5991 | 1.4558  | 33.2436  |
| 28 | A | 1287.0283 | 6.1097  | 80.0295  |
| 29 | A | 1445.7480 | 7.9906  | 17.6564  |
| 30 | A | 1454.1443 | 11.6551 | 27.5526  |
| 31 | A | 1518.7496 | 12.5225 | 82.9887  |
| 32 | A | 1566.4804 | 8.5520  | 262.7151 |
| 33 | A | 1647.3945 | 14.0829 | 22.2728  |
| 34 | A | 1656.1579 | 2.0334  | 21.7895  |
| 35 | A | 1710.9561 | 10.7983 | 286.1891 |
| 36 | A | 2190.5880 | 35.6228 | 3.2642   |
| 37 | A | 3235.8935 | 6.7431  | 0.2605   |
| 38 | A | 3599.7727 | 7.9999  | 77.4061  |
| 39 | A | 3714.5582 | 8.9423  | 41.8329  |

-----

molB\_pbe0d

| NM# | Symm | Wavenumber | Force Const | IR Intens |
|-----|------|------------|-------------|-----------|
| 1   | A    | 88.1957    | 0.0436      | 0.1360    |
| 2   | A    | 130.4335   | 0.1373      | 2.2126    |
| 3   | A    | 143.9939   | 0.1642      | 2.0304    |
| 4   | A    | 204.5258   | 0.1992      | 1.1748    |
| 5   | A    | 260.2673   | 0.2458      | 2.7153    |
| 6   | A    | 286.7995   | 0.5060      | 2.5868    |
| 7   | A    | 301.3042   | 0.2445      | 4.7384    |
| 8   | A    | 324.1077   | 0.2084      | 56.2950   |
| 9   | A    | 332.2810   | 0.1364      | 135.4294  |
| 10  | A    | 374.9737   | 0.2597      | 97.0779   |
| 11  | A    | 424.7403   | 0.6298      | 2.8457    |
| 12  | A    | 425.7936   | 0.1400      | 36.9491   |

ESI-87

|    |   |           |         |          |
|----|---|-----------|---------|----------|
| 13 | A | 450.5796  | 1.3959  | 3.6740   |
| 14 | A | 490.4242  | 1.6559  | 0.7960   |
| 15 | A | 517.8440  | 1.8081  | 1.3963   |
| 16 | A | 601.5585  | 2.1108  | 3.7502   |
| 17 | A | 605.7509  | 0.7952  | 4.2153   |
| 18 | A | 686.0181  | 1.3629  | 6.6797   |
| 19 | A | 692.8116  | 2.9406  | 1.5265   |
| 20 | A | 695.7316  | 1.8810  | 4.6613   |
| 21 | A | 722.3266  | 2.9238  | 0.7025   |
| 22 | A | 830.3938  | 0.6140  | 31.1049  |
| 23 | A | 948.6690  | 3.9467  | 79.4026  |
| 24 | A | 1060.2056 | 1.3694  | 30.5929  |
| 25 | A | 1134.6669 | 2.4553  | 59.6805  |
| 26 | A | 1197.8952 | 4.8259  | 43.0346  |
| 27 | A | 1230.9652 | 1.3967  | 54.1532  |
| 28 | A | 1298.7108 | 8.6858  | 100.1502 |
| 29 | A | 1393.5079 | 9.7413  | 15.8712  |
| 30 | A | 1462.2230 | 8.2260  | 20.9469  |
| 31 | A | 1533.8611 | 11.6490 | 88.6101  |
| 32 | A | 1582.9406 | 7.4635  | 299.5565 |
| 33 | A | 1649.7209 | 13.6226 | 39.8989  |
| 34 | A | 1655.8676 | 2.1546  | 78.2393  |
| 35 | A | 1721.2495 | 13.9633 | 465.9766 |
| 36 | A | 2371.7199 | 41.9554 | 71.8695  |
| 37 | A | 3227.9829 | 6.7083  | 0.2778   |
| 38 | A | 3639.1152 | 8.1652  | 119.0018 |
| 39 | A | 3756.7020 | 9.1743  | 56.8140  |

molB\_pbe

| NM# | Symm | Wavenumber | Force Const | IR Intens |
|-----|------|------------|-------------|-----------|
| 1   | A    | 83.8187    | 0.0398      | 0.1050    |
| 2   | A    | 125.6899   | 0.1275      | 1.9368    |
| 3   | A    | 136.8397   | 0.1489      | 1.9403    |
| 4   | A    | 194.6720   | 0.1870      | 0.8468    |
| 5   | A    | 248.6947   | 0.2278      | 2.1548    |
| 6   | A    | 276.5285   | 0.4956      | 1.4447    |
| 7   | A    | 290.5627   | 0.2231      | 2.2111    |
| 8   | A    | 312.8878   | 0.5619      | 3.9481    |
| 9   | A    | 326.8746   | 0.1319      | 86.1333   |
| 10  | A    | 369.6686   | 0.1678      | 167.9380  |
| 11  | A    | 409.1557   | 0.9159      | 0.1362    |
| 12  | A    | 416.8876   | 0.1212      | 64.9879   |
| 13  | A    | 432.4389   | 1.1532      | 4.6621    |
| 14  | A    | 470.0712   | 1.5409      | 0.6124    |
| 15  | A    | 489.7769   | 1.6054      | 0.9100    |
| 16  | A    | 571.6676   | 0.7138      | 3.7768    |
| 17  | A    | 575.9274   | 1.9158      | 4.4761    |
| 18  | A    | 657.9132   | 2.5335      | 0.8670    |
| 19  | A    | 659.0016   | 1.2836      | 6.2499    |
| 20  | A    | 670.3099   | 1.7709      | 6.3289    |
| 21  | A    | 683.4315   | 2.5738      | 0.1731    |
| 22  | A    | 786.1938   | 0.5464      | 27.1853   |
| 23  | A    | 907.3397   | 3.7416      | 82.6918   |

ESI-88



|    |   |           |         |          |
|----|---|-----------|---------|----------|
| 24 | A | 1018.1655 | 1.5355  | 42.5848  |
| 25 | A | 1082.3619 | 1.9393  | 43.6860  |
| 26 | A | 1144.6841 | 3.8437  | 39.8227  |
| 27 | A | 1183.7225 | 1.2993  | 61.9579  |
| 28 | A | 1234.4440 | 7.6562  | 84.4690  |
| 29 | A | 1360.6890 | 8.8724  | 34.7587  |
| 30 | A | 1392.1310 | 7.5109  | 14.7168  |
| 31 | A | 1463.4647 | 11.2651 | 96.6367  |
| 32 | A | 1510.8919 | 7.2202  | 233.5114 |
| 33 | A | 1564.3048 | 12.5126 | 28.3813  |
| 34 | A | 1596.8594 | 1.9615  | 30.2323  |
| 35 | A | 1646.4130 | 10.6196 | 437.2569 |
| 36 | A | 2250.0813 | 37.7348 | 62.8109  |
| 37 | A | 3137.9408 | 6.3328  | 0.1680   |
| 38 | A | 3521.5856 | 7.6440  | 101.2617 |
| 39 | A | 3634.3033 | 8.5805  | 47.0476  |

-----

molB\_rtpss

| NM# | Symm | Wavenumber | Force Const | IR Intens |
|-----|------|------------|-------------|-----------|
| 1   | A    | 85.0900    | 0.0408      | 0.1674    |
| 2   | A    | 123.5829   | 0.1238      | 1.9324    |
| 3   | A    | 139.1127   | 0.1502      | 2.2842    |
| 4   | A    | 195.4411   | 0.1956      | 0.7723    |
| 5   | A    | 250.5420   | 0.2263      | 3.1835    |
| 6   | A    | 269.1075   | 0.5048      | 1.0091    |
| 7   | A    | 285.3794   | 0.2072      | 1.4829    |
| 8   | A    | 310.0992   | 0.6987      | 0.5256    |
| 9   | A    | 334.4836   | 0.1820      | 17.2457   |
| 10  | A    | 393.5491   | 0.1402      | 24.9756   |
| 11  | A    | 409.2884   | 0.9246      | 1.0584    |
| 12  | A    | 429.2713   | 1.2291      | 4.1785    |
| 13  | A    | 470.3328   | 1.2557      | 6.4504    |
| 14  | A    | 479.8578   | 0.1970      | 278.9350  |
| 15  | A    | 492.5435   | 0.9367      | 56.5706   |
| 16  | A    | 574.0409   | 0.8113      | 2.1257    |
| 17  | A    | 579.1409   | 1.5644      | 14.9528   |
| 18  | A    | 652.2831   | 2.8397      | 0.7159    |
| 19  | A    | 659.7131   | 1.1564      | 5.1541    |
| 20  | A    | 663.7440   | 2.7670      | 1.0262    |
| 21  | A    | 673.1098   | 1.9865      | 9.4250    |
| 22  | A    | 801.4796   | 0.5340      | 26.9675   |
| 23  | A    | 908.9045   | 3.8730      | 87.4133   |
| 24  | A    | 1027.8546  | 2.0977      | 65.7262   |
| 25  | A    | 1095.8209  | 1.9077      | 20.0639   |
| 26  | A    | 1148.3201  | 2.7754      | 45.8098   |
| 27  | A    | 1205.0339  | 1.3935      | 64.6453   |
| 28  | A    | 1239.9244  | 7.1376      | 82.5882   |
| 29  | A    | 1367.5309  | 8.6174      | 24.8591   |
| 30  | A    | 1396.5220  | 7.4825      | 21.5039   |
| 31  | A    | 1473.6472  | 12.2334     | 99.4158   |
| 32  | A    | 1520.7576  | 7.2731      | 236.8502  |
| 33  | A    | 1583.3264  | 12.1634     | 21.1032   |
| 34  | A    | 1634.0690  | 2.3552      | 8.6792    |

ESI-89

|    |   |           |         |          |
|----|---|-----------|---------|----------|
| 35 | A | 1663.7542 | 5.6406  | 403.1800 |
| 36 | A | 2264.2519 | 38.2194 | 61.1554  |
| 37 | A | 3164.9835 | 6.4425  | 0.7667   |
| 38 | A | 3509.3168 | 7.5942  | 64.2561  |
| 39 | A | 3616.9699 | 8.4873  | 32.4122  |

molB\_wb97xd

| NM# | Symm | Wavenumber | Force Const | IR Intens |
|-----|------|------------|-------------|-----------|
| 1   | A    | 88.4889    | 0.0438      | 0.1568    |
| 2   | A    | 132.5278   | 0.1415      | 2.2889    |
| 3   | A    | 144.0109   | 0.1644      | 2.0605    |
| 4   | A    | 205.8186   | 0.2013      | 1.1512    |
| 5   | A    | 261.2799   | 0.2446      | 3.3176    |
| 6   | A    | 289.8518   | 0.4443      | 4.0229    |
| 7   | A    | 303.6740   | 0.2685      | 6.7977    |
| 8   | A    | 322.8611   | 0.1152      | 130.4781  |
| 9   | A    | 330.8482   | 0.2345      | 78.2196   |
| 10  | A    | 373.4063   | 0.2583      | 82.9295   |
| 11  | A    | 417.6053   | 0.1298      | 34.5196   |
| 12  | A    | 426.9269   | 1.0087      | 0.8531    |
| 13  | A    | 452.7792   | 1.4467      | 3.8190    |
| 14  | A    | 490.7115   | 1.6846      | 0.9352    |
| 15  | A    | 518.2907   | 1.8077      | 1.5578    |
| 16  | A    | 599.9436   | 2.1070      | 4.0282    |
| 17  | A    | 610.7345   | 0.8243      | 4.1614    |
| 18  | A    | 686.7983   | 1.5656      | 10.0963   |
| 19  | A    | 695.5732   | 2.6355      | 0.9610    |
| 20  | A    | 697.9925   | 1.7386      | 2.6602    |
| 21  | A    | 730.0231   | 2.8988      | 0.7542    |
| 22  | A    | 841.1767   | 0.6319      | 32.6917   |
| 23  | A    | 944.6947   | 4.1531      | 84.4787   |
| 24  | A    | 1060.7696  | 1.4777      | 36.2794   |
| 25  | A    | 1131.5337  | 2.3709      | 56.9899   |
| 26  | A    | 1191.1980  | 4.5644      | 49.3616   |
| 27  | A    | 1238.6141  | 1.4084      | 51.1339   |
| 28  | A    | 1292.4182  | 8.7965      | 111.4247  |
| 29  | A    | 1358.3518  | 8.3431      | 5.3958    |
| 30  | A    | 1454.9436  | 8.1113      | 26.1227   |
| 31  | A    | 1530.5350  | 12.1708     | 100.7333  |
| 32  | A    | 1580.9753  | 7.3314      | 300.4392  |
| 33  | A    | 1655.2523  | 14.5494     | 46.5848   |
| 34  | A    | 1661.6107  | 2.1030      | 68.7059   |
| 35  | A    | 1721.5499  | 13.4911     | 476.7428  |
| 36  | A    | 2387.3066  | 42.5339     | 66.0548   |
| 37  | A    | 3224.6654  | 6.6967      | 0.2085    |
| 38  | A    | 3644.3001  | 8.1891      | 109.6857  |
| 39  | A    | 3760.9296  | 9.1955      | 53.1837   |

molB\_x31yp

| NM# | Symm | Wavenumber | Force Const | IR Intens |
|-----|------|------------|-------------|-----------|
|-----|------|------------|-------------|-----------|

|    |   |           |         |          |
|----|---|-----------|---------|----------|
| 1  | A | 88.0914   | 0.0438  | 0.1266   |
| 2  | A | 132.1598  | 0.1408  | 2.2120   |
| 3  | A | 143.3571  | 0.1646  | 2.0394   |
| 4  | A | 203.2147  | 0.1973  | 0.8737   |
| 5  | A | 260.2445  | 0.2496  | 2.3434   |
| 6  | A | 287.7452  | 0.5194  | 3.1353   |
| 7  | A | 300.6785  | 0.2411  | 7.0764   |
| 8  | A | 319.5952  | 0.1446  | 92.9984  |
| 9  | A | 327.1344  | 0.1682  | 109.0437 |
| 10 | A | 368.8563  | 0.2715  | 81.6790  |
| 11 | A | 422.6332  | 0.1419  | 30.5074  |
| 12 | A | 424.0208  | 0.5360  | 6.1430   |
| 13 | A | 449.3290  | 1.4094  | 3.8630   |
| 14 | A | 486.1290  | 1.6442  | 0.8970   |
| 15 | A | 511.0859  | 1.7406  | 1.2920   |
| 16 | A | 592.3135  | 2.0565  | 4.0733   |
| 17 | A | 600.3048  | 0.7857  | 4.0137   |
| 18 | A | 680.0189  | 1.3698  | 8.3225   |
| 19 | A | 690.4251  | 2.5155  | 2.5730   |
| 20 | A | 692.4054  | 2.0061  | 3.9423   |
| 21 | A | 729.3277  | 2.6916  | 0.3463   |
| 22 | A | 833.2778  | 0.6264  | 30.5937  |
| 23 | A | 932.8065  | 4.1363  | 87.8825  |
| 24 | A | 1048.5963 | 1.6453  | 43.7300  |
| 25 | A | 1114.4735 | 2.1455  | 46.4004  |
| 26 | A | 1173.9394 | 3.9997  | 49.9394  |
| 27 | A | 1227.4453 | 1.4024  | 63.4331  |
| 28 | A | 1274.2007 | 8.5625  | 101.8742 |
| 29 | A | 1356.3218 | 8.3857  | 13.0469  |
| 30 | A | 1429.7895 | 7.9119  | 26.8114  |
| 31 | A | 1504.3485 | 12.2836 | 99.6052  |
| 32 | A | 1554.6751 | 7.3619  | 277.4269 |
| 33 | A | 1617.0957 | 13.4249 | 35.9246  |
| 34 | A | 1652.7435 | 2.1116  | 24.0319  |
| 35 | A | 1691.3234 | 9.8239  | 485.1014 |
| 36 | A | 2346.6685 | 41.0954 | 68.4108  |
| 37 | A | 3206.3927 | 6.6153  | 0.2042   |
| 38 | A | 3606.4839 | 8.0168  | 116.0413 |
| 39 | A | 3719.3118 | 8.9941  | 53.4890  |

molC\_apfd

| NM# | Symm | Wavenumber | Force Const | IR Intens |
|-----|------|------------|-------------|-----------|
| 1   | A    | 95.7747    | 0.0469      | 0.2914    |
| 2   | A    | 132.5802   | 0.1343      | 3.3811    |
| 3   | A    | 156.1881   | 0.1370      | 0.3464    |
| 4   | A    | 166.8666   | 0.2182      | 3.9680    |
| 5   | A    | 290.4136   | 0.8143      | 1.0863    |
| 6   | A    | 294.2608   | 0.1969      | 5.8232    |
| 7   | A    | 296.8793   | 0.2556      | 15.9722   |
| 8   | A    | 326.5467   | 0.7946      | 4.6363    |
| 9   | A    | 366.0266   | 0.1299      | 220.3078  |
| 10  | A    | 372.9924   | 0.2449      | 78.6267   |
| 11  | A    | 416.1195   | 0.7269      | 2.2725    |

ESI-91

|    |   |           |         |          |
|----|---|-----------|---------|----------|
| 12 | A | 420.8861  | 0.1266  | 6.9353   |
| 13 | A | 473.2897  | 1.2998  | 1.1233   |
| 14 | A | 493.3375  | 1.6626  | 2.6033   |
| 15 | A | 499.7418  | 1.3212  | 0.6615   |
| 16 | A | 550.8708  | 2.4681  | 3.1186   |
| 17 | A | 576.8350  | 0.9760  | 4.9117   |
| 18 | A | 685.2247  | 3.1530  | 0.9803   |
| 19 | A | 703.9033  | 1.3522  | 0.8603   |
| 20 | A | 721.0095  | 3.1720  | 1.2701   |
| 21 | A | 743.7162  | 2.4630  | 17.2879  |
| 22 | A | 881.5829  | 0.6300  | 22.4984  |
| 23 | A | 925.6169  | 1.9200  | 68.4770  |
| 24 | A | 1014.7642 | 2.7855  | 44.4827  |
| 25 | A | 1156.8609 | 2.8836  | 18.8285  |
| 26 | A | 1183.6728 | 1.8276  | 150.1392 |
| 27 | A | 1237.3240 | 1.6837  | 8.7027   |
| 28 | A | 1313.3730 | 6.4553  | 19.2752  |
| 29 | A | 1378.0503 | 7.9467  | 54.3566  |
| 30 | A | 1425.3687 | 12.0698 | 58.1367  |
| 31 | A | 1539.6399 | 12.1645 | 229.7058 |
| 32 | A | 1570.1544 | 6.4818  | 207.8757 |
| 33 | A | 1644.1518 | 3.0969  | 60.4869  |
| 34 | A | 1645.9233 | 5.3857  | 28.7430  |
| 35 | A | 1703.4710 | 9.3849  | 240.5687 |
| 36 | A | 2357.9828 | 41.4942 | 72.0955  |
| 37 | A | 3233.8878 | 6.7381  | 3.0365   |
| 38 | A | 3625.8050 | 8.1025  | 129.5230 |
| 39 | A | 3743.2240 | 9.1136  | 66.8954  |

-----

molC\_b3lypd

| NM# | Symm | Wavenumber | Force Const | IR Intens |
|-----|------|------------|-------------|-----------|
| 1   | A    | 95.4274    | 0.0466      | 0.3210    |
| 2   | A    | 133.2723   | 0.1360      | 3.4415    |
| 3   | A    | 155.5697   | 0.1362      | 0.2820    |
| 4   | A    | 166.1951   | 0.2178      | 4.3862    |
| 5   | A    | 283.8646   | 0.1797      | 5.3447    |
| 6   | A    | 289.6473   | 0.7314      | 1.0211    |
| 7   | A    | 293.0818   | 0.2657      | 13.2868   |
| 8   | A    | 321.4383   | 0.8208      | 3.0410    |
| 9   | A    | 366.1014   | 0.2863      | 45.8937   |
| 10  | A    | 376.1424   | 0.1276      | 257.5801  |
| 11  | A    | 416.2425   | 0.7691      | 3.5463    |
| 12  | A    | 422.0183   | 0.1236      | 7.1270    |
| 13  | A    | 468.4391   | 1.2611      | 1.3375    |
| 14  | A    | 487.9402   | 1.6135      | 2.5759    |
| 15  | A    | 492.5804   | 1.2877      | 1.0402    |
| 16  | A    | 545.3069   | 2.3958      | 3.6044    |
| 17  | A    | 570.9905   | 0.9445      | 4.6564    |
| 18  | A    | 681.9587   | 3.1378      | 1.0479    |
| 19  | A    | 699.5827   | 1.3393      | 0.9525    |
| 20  | A    | 725.8417   | 3.0620      | 1.5818    |
| 21  | A    | 736.8376   | 2.4258      | 19.0755   |
| 22  | A    | 881.1607   | 0.6323      | 21.4720   |

ESI-92

|    |   |           |         |          |
|----|---|-----------|---------|----------|
| 23 | A | 911.9942  | 2.0188  | 72.9331  |
| 24 | A | 998.9804  | 2.8439  | 50.5071  |
| 25 | A | 1138.0012 | 3.3924  | 20.1695  |
| 26 | A | 1170.8222 | 1.7809  | 153.2883 |
| 27 | A | 1228.5151 | 1.6150  | 9.1678   |
| 28 | A | 1298.8066 | 5.8643  | 20.9775  |
| 29 | A | 1352.6968 | 6.6736  | 49.4846  |
| 30 | A | 1401.1966 | 11.2299 | 64.2467  |
| 31 | A | 1518.3067 | 11.7197 | 206.0300 |
| 32 | A | 1549.7335 | 7.2874  | 224.2263 |
| 33 | A | 1619.8882 | 13.0775 | 20.5609  |
| 34 | A | 1636.1880 | 2.2185  | 37.2411  |
| 35 | A | 1683.4860 | 7.7224  | 241.4072 |
| 36 | A | 2338.2479 | 40.8042 | 70.7849  |
| 37 | A | 3220.3976 | 6.6787  | 2.3529   |
| 38 | A | 3599.9657 | 7.9837  | 123.1228 |
| 39 | A | 3714.0186 | 8.9709  | 63.4598  |

-----

molC\_blyp

| NM# | Symm | Wavenumber | Force Const | IR Intens |
|-----|------|------------|-------------|-----------|
| 1   | A    | 91.4464    | 0.0430      | 0.2316    |
| 2   | A    | 130.0648   | 0.1297      | 3.0911    |
| 3   | A    | 148.4597   | 0.1238      | 0.3556    |
| 4   | A    | 159.3822   | 0.1998      | 4.2885    |
| 5   | A    | 274.3968   | 0.1650      | 5.4242    |
| 6   | A    | 279.7693   | 0.3012      | 7.2365    |
| 7   | A    | 280.2861   | 0.5742      | 1.0972    |
| 8   | A    | 308.9463   | 0.8074      | 1.7618    |
| 9   | A    | 350.3797   | 0.4126      | 4.7052    |
| 10  | A    | 384.8418   | 0.1235      | 279.3314  |
| 11  | A    | 403.1618   | 0.5822      | 21.0079   |
| 12  | A    | 412.9787   | 0.1156      | 7.6190    |
| 13  | A    | 450.6223   | 1.1537      | 1.1366    |
| 14  | A    | 469.1778   | 1.3262      | 1.2574    |
| 15  | A    | 469.6569   | 1.2513      | 2.4409    |
| 16  | A    | 522.9285   | 2.1233      | 5.5326    |
| 17  | A    | 544.6631   | 0.8594      | 4.0140    |
| 18  | A    | 650.3717   | 2.8290      | 1.1282    |
| 19  | A    | 674.4379   | 1.2633      | 0.7863    |
| 20  | A    | 692.0261   | 2.7751      | 0.9758    |
| 21  | A    | 707.4363   | 2.2400      | 21.5189   |
| 22  | A    | 838.2209   | 0.5682      | 20.6265   |
| 23  | A    | 873.5697   | 1.9835      | 75.3384   |
| 24  | A    | 955.3086   | 2.9796      | 56.7943   |
| 25  | A    | 1083.4720  | 3.5130      | 15.0776   |
| 26  | A    | 1126.2606  | 1.6006      | 152.3423  |
| 27  | A    | 1183.4188  | 1.6034      | 11.1119   |
| 28  | A    | 1238.6199  | 4.0506      | 27.0666   |
| 29  | A    | 1303.7034  | 5.8532      | 63.0792   |
| 30  | A    | 1347.9769  | 9.6485      | 48.5515   |
| 31  | A    | 1446.2278  | 10.5460     | 168.4151  |
| 32  | A    | 1484.6383  | 7.1119      | 191.8405  |
| 33  | A    | 1537.6975  | 10.8630     | 21.9752   |

ESI-93

|    |   |           |         |          |
|----|---|-----------|---------|----------|
| 34 | A | 1583.1540 | 2.5779  | 3.7297   |
| 35 | A | 1618.2542 | 4.0075  | 236.0955 |
| 36 | A | 2227.7047 | 37.0246 | 63.9418  |
| 37 | A | 3141.1696 | 6.3479  | 1.7534   |
| 38 | A | 3495.5525 | 7.5253  | 106.3378 |
| 39 | A | 3605.1594 | 8.4481  | 53.7130  |

molC\_camb3lypd

| NM# | Symm | Wavenumber | Force Const | IR Intens |
|-----|------|------------|-------------|-----------|
| 1   | A    | 97.7939    | 0.0493      | 0.4065    |
| 2   | A    | 134.6578   | 0.1388      | 3.6434    |
| 3   | A    | 159.0001   | 0.1478      | 0.1129    |
| 4   | A    | 169.1489   | 0.2319      | 3.3452    |
| 5   | A    | 283.7323   | 0.1844      | 5.4258    |
| 6   | A    | 290.2632   | 0.5059      | 8.7511    |
| 7   | A    | 296.0909   | 0.1475      | 67.9235   |
| 8   | A    | 320.2358   | 0.2080      | 92.1208   |
| 9   | A    | 331.6366   | 0.1760      | 144.9860  |
| 10  | A    | 376.3518   | 0.4477      | 1.1115    |
| 11  | A    | 419.9729   | 0.9405      | 0.5081    |
| 12  | A    | 429.1309   | 0.1246      | 6.0805    |
| 13  | A    | 474.7554   | 1.2927      | 1.4588    |
| 14  | A    | 493.8823   | 1.6748      | 2.7268    |
| 15  | A    | 504.8973   | 1.3244      | 0.6032    |
| 16  | A    | 551.8871   | 2.5606      | 1.7496    |
| 17  | A    | 584.2480   | 0.9844      | 5.1689    |
| 18  | A    | 699.6336   | 3.2690      | 1.0602    |
| 19  | A    | 706.8580   | 1.3442      | 1.1073    |
| 20  | A    | 746.7093   | 2.8530      | 5.8699    |
| 21  | A    | 747.8531   | 2.7023      | 14.2264   |
| 22  | A    | 906.9562   | 0.6797      | 21.7260   |
| 23  | A    | 924.2978   | 1.9440      | 68.4033   |
| 24  | A    | 1012.4685  | 2.6539      | 42.2055   |
| 25  | A    | 1157.9980  | 3.0546      | 24.0353   |
| 26  | A    | 1180.7267  | 1.9210      | 154.7432  |
| 27  | A    | 1240.3680  | 1.7095      | 10.5652   |
| 28  | A    | 1322.9336  | 6.4513      | 15.5360   |
| 29  | A    | 1354.6010  | 6.6853      | 32.1719   |
| 30  | A    | 1423.2329  | 11.7651     | 84.1371   |
| 31  | A    | 1551.5693  | 12.2320     | 223.0786  |
| 32  | A    | 1578.3824  | 6.0499      | 215.4077  |
| 33  | A    | 1646.9903  | 2.2307      | 123.5200  |
| 34  | A    | 1664.3363  | 14.7684     | 16.0561   |
| 35  | A    | 1717.2893  | 12.1771     | 228.1315  |
| 36  | A    | 2400.0456  | 43.0061     | 67.8489   |
| 37  | A    | 3238.7933  | 6.7612      | 3.4293    |
| 38  | A    | 3629.6255  | 8.1153      | 142.9856  |
| 39  | A    | 3745.1845  | 9.1295      | 74.0367   |

molC\_m062x

| NM# | Symm | Wavenumber | Force Const | IR Intens |
|-----|------|------------|-------------|-----------|
|-----|------|------------|-------------|-----------|

ESI-94

|    |   |           |         |          |
|----|---|-----------|---------|----------|
| 1  | A | 97.1284   | 0.0475  | 0.3483   |
| 2  | A | 131.6197  | 0.1324  | 3.4116   |
| 3  | A | 159.1524  | 0.1401  | 0.3064   |
| 4  | A | 168.8394  | 0.2191  | 4.9191   |
| 5  | A | 283.4550  | 0.1935  | 4.9117   |
| 6  | A | 289.1194  | 0.6141  | 0.5700   |
| 7  | A | 298.6220  | 0.2757  | 13.4426  |
| 8  | A | 325.9620  | 0.8647  | 2.6639   |
| 9  | A | 370.9641  | 0.2385  | 16.3149  |
| 10 | A | 395.6008  | 0.1377  | 290.4761 |
| 11 | A | 406.8680  | 0.1270  | 18.9092  |
| 12 | A | 416.8309  | 0.7430  | 12.4757  |
| 13 | A | 472.6682  | 1.2957  | 1.2160   |
| 14 | A | 492.6544  | 1.6223  | 2.9913   |
| 15 | A | 502.2011  | 1.3957  | 1.5495   |
| 16 | A | 553.1338  | 2.3827  | 4.4583   |
| 17 | A | 579.2144  | 1.0139  | 4.7890   |
| 18 | A | 684.2428  | 3.1374  | 0.5507   |
| 19 | A | 703.0873  | 1.3494  | 0.7722   |
| 20 | A | 714.5662  | 3.1744  | 1.7089   |
| 21 | A | 745.1620  | 2.4212  | 15.8137  |
| 22 | A | 896.3876  | 0.6471  | 24.3268  |
| 23 | A | 930.1616  | 1.9783  | 63.9643  |
| 24 | A | 1019.7937 | 2.4273  | 39.0290  |
| 25 | A | 1164.8349 | 2.4608  | 18.5371  |
| 26 | A | 1192.0992 | 1.9431  | 148.1640 |
| 27 | A | 1241.5348 | 1.8618  | 10.3265  |
| 28 | A | 1330.7123 | 6.8810  | 6.8946   |
| 29 | A | 1359.6517 | 7.1521  | 31.1707  |
| 30 | A | 1430.3920 | 12.2551 | 72.6814  |
| 31 | A | 1565.3108 | 12.6220 | 239.7318 |
| 32 | A | 1579.4908 | 5.9637  | 220.7940 |
| 33 | A | 1641.9310 | 2.2443  | 128.9641 |
| 34 | A | 1674.0321 | 15.2488 | 17.7971  |
| 35 | A | 1718.7553 | 12.5242 | 188.2506 |
| 36 | A | 2410.5124 | 43.3876 | 59.4547  |
| 37 | A | 3247.5094 | 6.7975  | 4.9301   |
| 38 | A | 3618.4668 | 8.0704  | 137.9418 |
| 39 | A | 3736.0784 | 9.0765  | 75.2029  |

molC\_mp2

| NM# | Symm | Wavenumber | Force Const | IR Intens |
|-----|------|------------|-------------|-----------|
| 1   | A    | 94.0670    | 0.0455      | 0.3693    |
| 2   | A    | 126.0757   | 0.1217      | 3.0695    |
| 3   | A    | 154.7363   | 0.1285      | 0.3966    |
| 4   | A    | 164.7976   | 0.1931      | 5.3990    |
| 5   | A    | 284.3827   | 0.1767      | 4.0093    |
| 6   | A    | 290.8238   | 0.7968      | 0.8549    |
| 7   | A    | 294.6790   | 0.3391      | 4.5990    |
| 8   | A    | 323.1111   | 0.9149      | 2.0881    |
| 9   | A    | 349.4035   | 0.1307      | 9.9972    |
| 10  | A    | 376.2866   | 0.1698      | 7.8179    |

|    |   |           |         |          |
|----|---|-----------|---------|----------|
| 11 | A | 411.7341  | 1.0062  | 0.0447   |
| 12 | A | 448.6103  | 1.1779  | 2.2875   |
| 13 | A | 454.3537  | 1.2588  | 1.5537   |
| 14 | A | 482.5692  | 1.6700  | 1.6357   |
| 15 | A | 547.9722  | 2.2089  | 3.1930   |
| 16 | A | 555.5728  | 0.9937  | 7.4360   |
| 17 | A | 603.7465  | 0.3264  | 302.6161 |
| 18 | A | 632.3164  | 1.8958  | 32.8129  |
| 19 | A | 690.1685  | 1.3512  | 0.4794   |
| 20 | A | 703.3923  | 2.0135  | 29.7688  |
| 21 | A | 740.0720  | 2.2267  | 17.1618  |
| 22 | A | 846.1050  | 0.5476  | 27.8669  |
| 23 | A | 917.5906  | 2.3320  | 62.8362  |
| 24 | A | 1011.8112 | 2.8044  | 53.4960  |
| 25 | A | 1142.2917 | 3.5677  | 18.5849  |
| 26 | A | 1203.0410 | 1.5691  | 131.5141 |
| 27 | A | 1240.1964 | 1.5252  | 6.6163   |
| 28 | A | 1303.7707 | 6.5984  | 9.6248   |
| 29 | A | 1389.3347 | 9.5022  | 77.1779  |
| 30 | A | 1481.0658 | 12.0317 | 27.9904  |
| 31 | A | 1537.2532 | 12.5525 | 204.6454 |
| 32 | A | 1561.0982 | 8.1603  | 196.9353 |
| 33 | A | 1643.8107 | 2.1042  | 35.4468  |
| 34 | A | 1646.9909 | 12.6833 | 27.0208  |
| 35 | A | 1705.4882 | 9.2293  | 115.1684 |
| 36 | A | 2184.4065 | 35.4304 | 3.0867   |
| 37 | A | 3248.8717 | 6.8020  | 2.8310   |
| 38 | A | 3597.0050 | 7.9842  | 85.9180  |
| 39 | A | 3713.8052 | 8.9423  | 51.2918  |

-----

molC\_pbe0d

| NM# | Symm | Wavenumber | Force Const | IR Intens |
|-----|------|------------|-------------|-----------|
| 1   | A    | 96.2417    | 0.0472      | 0.3019    |
| 2   | A    | 132.5891   | 0.1345      | 3.3985    |
| 3   | A    | 157.2804   | 0.1381      | 0.3522    |
| 4   | A    | 168.0290   | 0.2207      | 4.0882    |
| 5   | A    | 280.7925   | 0.1764      | 5.1987    |
| 6   | A    | 288.9782   | 0.7236      | 0.4680    |
| 7   | A    | 297.7283   | 0.2645      | 15.4791   |
| 8   | A    | 325.2698   | 0.8498      | 2.7457    |
| 9   | A    | 371.3872   | 0.2828      | 40.5607   |
| 10  | A    | 382.6862   | 0.1302      | 266.4207  |
| 11  | A    | 416.1382   | 0.7397      | 3.7636    |
| 12  | A    | 421.3661   | 0.1274      | 7.3372    |
| 13  | A    | 471.4712   | 1.2682      | 1.0357    |
| 14  | A    | 492.6294   | 1.6423      | 2.6130    |
| 15  | A    | 500.8083   | 1.3396      | 0.9804    |
| 16  | A    | 552.1157   | 2.4740      | 3.3032    |
| 17  | A    | 578.2568   | 0.9789      | 4.9763    |
| 18  | A    | 687.1982   | 3.1836      | 0.9363    |
| 19  | A    | 703.9219   | 1.3417      | 0.7739    |
| 20  | A    | 723.3968   | 3.1945      | 1.3188    |
| 21  | A    | 744.1917   | 2.4462      | 16.1130   |

ESI-96



|    |   |           |         |          |
|----|---|-----------|---------|----------|
| 22 | A | 882.6897  | 0.6314  | 22.7017  |
| 23 | A | 927.7257  | 1.9161  | 65.5096  |
| 24 | A | 1015.6928 | 2.6750  | 42.9564  |
| 25 | A | 1159.8686 | 2.6122  | 18.5677  |
| 26 | A | 1187.8571 | 1.8592  | 151.0673 |
| 27 | A | 1239.1849 | 1.7651  | 8.2898   |
| 28 | A | 1322.0655 | 6.8871  | 19.3962  |
| 29 | A | 1384.9578 | 8.2113  | 59.9763  |
| 30 | A | 1433.4431 | 12.1225 | 49.3862  |
| 31 | A | 1552.4503 | 12.4680 | 236.0490 |
| 32 | A | 1578.4902 | 5.9244  | 194.4325 |
| 33 | A | 1642.8537 | 2.2749  | 103.8489 |
| 34 | A | 1656.3931 | 14.4035 | 19.8656  |
| 35 | A | 1714.4086 | 11.7102 | 224.4106 |
| 36 | A | 2368.6572 | 41.8561 | 72.9824  |
| 37 | A | 3242.4956 | 6.7745  | 3.1805   |
| 38 | A | 3634.7172 | 8.1415  | 128.0604 |
| 39 | A | 3753.0279 | 9.1591  | 67.5848  |

molC\_pbe

| NM# | Symm | Wavenumber | Force Const | IR Intens |
|-----|------|------------|-------------|-----------|
| 1   | A    | 91.4941    | 0.0431      | 0.2166    |
| 2   | A    | 127.8667   | 0.1252      | 3.0087    |
| 3   | A    | 149.4658   | 0.1254      | 0.3711    |
| 4   | A    | 159.8903   | 0.2010      | 3.6605    |
| 5   | A    | 270.7806   | 0.1617      | 5.3154    |
| 6   | A    | 278.2867   | 0.6799      | 0.3965    |
| 7   | A    | 281.7563   | 0.2629      | 9.9624    |
| 8   | A    | 312.1420   | 0.8181      | 1.7767    |
| 9   | A    | 353.8471   | 0.3970      | 6.4938    |
| 10  | A    | 382.1700   | 0.1187      | 284.1320  |
| 11  | A    | 401.7135   | 0.6875      | 11.4567   |
| 12  | A    | 415.1278   | 0.1176      | 7.6342    |
| 13  | A    | 452.4031   | 1.1365      | 0.8336    |
| 14  | A    | 472.4257   | 1.4954      | 2.2723    |
| 15  | A    | 474.2247   | 1.1682      | 1.0332    |
| 16  | A    | 529.6474   | 2.2519      | 4.3669    |
| 17  | A    | 548.4657   | 0.8674      | 4.3308    |
| 18  | A    | 652.3513   | 2.8635      | 1.0867    |
| 19  | A    | 676.2473   | 1.2543      | 0.5299    |
| 20  | A    | 687.6408   | 2.8730      | 0.6381    |
| 21  | A    | 713.8626   | 2.2586      | 17.7892   |
| 22  | A    | 831.1877   | 0.5565      | 21.6897   |
| 23  | A    | 888.6366   | 1.8247      | 66.4558   |
| 24  | A    | 971.6000   | 2.7607      | 47.2471   |
| 25  | A    | 1105.9895  | 2.7120      | 19.3697   |
| 26  | A    | 1138.6265  | 1.6854      | 143.7471  |
| 27  | A    | 1189.0564  | 1.5400      | 8.2990    |
| 28  | A    | 1256.5361  | 5.4216      | 28.7943   |
| 29  | A    | 1334.3786  | 7.7490      | 76.3583   |
| 30  | A    | 1386.1235  | 10.5554     | 37.9506   |
| 31  | A    | 1476.4236  | 11.3144     | 195.3548  |
| 32  | A    | 1512.3068  | 6.4066      | 167.1475  |

|    |   |           |         |          |
|----|---|-----------|---------|----------|
| 33 | A | 1567.9856 | 12.4122 | 21.4948  |
| 34 | A | 1581.3249 | 2.0355  | 50.3675  |
| 35 | A | 1641.7338 | 9.2156  | 227.4107 |
| 36 | A | 2246.9163 | 37.6386 | 66.6890  |
| 37 | A | 3154.6717 | 6.4056  | 2.6693   |
| 38 | A | 3518.8341 | 7.6276  | 112.5857 |
| 39 | A | 3632.9633 | 8.5786  | 58.3501  |

-----

molC\_rtpss

| NM# | Symm | Wavenumber | Force Const | IR Intens |
|-----|------|------------|-------------|-----------|
| 1   | A    | 92.7545    | 0.0439      | 0.3014    |
| 2   | A    | 126.0916   | 0.1221      | 3.0642    |
| 3   | A    | 151.7843   | 0.1257      | 0.3919    |
| 4   | A    | 161.8906   | 0.1980      | 5.0616    |
| 5   | A    | 262.5845   | 0.1588      | 5.1142    |
| 6   | A    | 270.9310   | 0.5430      | 0.1748    |
| 7   | A    | 281.8196   | 0.2886      | 6.1949    |
| 8   | A    | 309.5078   | 0.8334      | 1.3611    |
| 9   | A    | 354.3118   | 0.3360      | 2.7167    |
| 10  | A    | 399.8446   | 0.3621      | 3.1268    |
| 11  | A    | 403.2601   | 0.1474      | 7.5225    |
| 12  | A    | 451.0702   | 1.1488      | 0.6772    |
| 13  | A    | 470.4822   | 0.5634      | 63.4892   |
| 14  | A    | 474.0378   | 1.2514      | 1.8197    |
| 15  | A    | 490.7905   | 0.2531      | 260.9698  |
| 16  | A    | 536.0339   | 1.1636      | 44.7513   |
| 17  | A    | 548.2459   | 0.9283      | 3.8091    |
| 18  | A    | 647.8864   | 2.8945      | 0.4591    |
| 19  | A    | 669.4645   | 2.8758      | 0.8319    |
| 20  | A    | 675.9704   | 1.2736      | 0.4638    |
| 21  | A    | 717.8330   | 2.1669      | 21.2925   |
| 22  | A    | 850.4446   | 0.5686      | 21.5472   |
| 23  | A    | 892.8592   | 2.0763      | 72.4864   |
| 24  | A    | 978.9534   | 2.9537      | 59.9434   |
| 25  | A    | 1108.3614  | 3.4161      | 14.5600   |
| 26  | A    | 1158.6243  | 1.6110      | 140.2818  |
| 27  | A    | 1207.7556  | 1.6072      | 9.8458    |
| 28  | A    | 1262.4267  | 4.7019      | 23.4156   |
| 29  | A    | 1341.2225  | 6.8357      | 74.1218   |
| 30  | A    | 1391.5184  | 10.5782     | 33.5037   |
| 31  | A    | 1487.2732  | 11.1828     | 191.5723  |
| 32  | A    | 1521.1555  | 7.5875      | 182.8899  |
| 33  | A    | 1587.1698  | 11.9170     | 21.9075   |
| 34  | A    | 1617.0108  | 2.3307      | 9.4361    |
| 35  | A    | 1659.7546  | 5.5605      | 209.2346  |
| 36  | A    | 2260.5700  | 38.1057     | 64.7850   |
| 37  | A    | 3184.6115  | 6.5279      | 0.9170    |
| 38  | A    | 3506.4133  | 7.5777      | 73.3789   |
| 39  | A    | 3616.0381  | 8.4868      | 42.0523   |

-----

molC\_wb97xd

| NM# | Symm | Wavenumber | Force Const | IR Intens |
|-----|------|------------|-------------|-----------|
| 1   | A    | 96.7245    | 0.0476      | 0.3488    |
| 2   | A    | 134.0924   | 0.1375      | 3.5264    |
| 3   | A    | 157.2150   | 0.1379      | 0.3877    |
| 4   | A    | 168.5666   | 0.2210      | 4.3895    |
| 5   | A    | 285.8238   | 0.1811      | 5.0225    |
| 6   | A    | 293.0933   | 0.8003      | 0.7650    |
| 7   | A    | 300.3373   | 0.2675      | 16.1538   |
| 8   | A    | 326.4005   | 0.8443      | 3.1756    |
| 9   | A    | 371.0524   | 0.2181      | 62.0685   |
| 10  | A    | 380.4353   | 0.1358      | 246.1286  |
| 11  | A    | 411.6201   | 0.1267      | 7.7100    |
| 12  | A    | 418.4743   | 0.8423      | 3.1557    |
| 13  | A    | 472.6653   | 1.3101      | 1.3158    |
| 14  | A    | 492.8697   | 1.6512      | 2.7285    |
| 15  | A    | 502.5509   | 1.3840      | 0.9625    |
| 16  | A    | 550.0243   | 2.4166      | 3.5410    |
| 17  | A    | 580.2695   | 0.9971      | 4.8351    |
| 18  | A    | 690.0647   | 3.1918      | 0.6819    |
| 19  | A    | 707.1188   | 1.3652      | 0.9824    |
| 20  | A    | 727.2742   | 3.1230      | 1.9134    |
| 21  | A    | 744.4103   | 2.4578      | 17.5217   |
| 22  | A    | 897.7695   | 0.6563      | 23.0728   |
| 23  | A    | 924.4837   | 2.0579      | 70.0877   |
| 24  | A    | 1011.8995  | 2.6621      | 46.9778   |
| 25  | A    | 1156.5180  | 3.1030      | 21.2337   |
| 26  | A    | 1185.3271  | 1.8419      | 151.3633  |
| 27  | A    | 1241.2153  | 1.6829      | 9.8173    |
| 28  | A    | 1318.9153  | 6.6332      | 16.8278   |
| 29  | A    | 1360.0090  | 6.5832      | 33.5446   |
| 30  | A    | 1419.5071  | 11.8017     | 74.6696   |
| 31  | A    | 1548.0516  | 12.2647     | 234.8838  |
| 32  | A    | 1576.2092  | 6.5967      | 226.6399  |
| 33  | A    | 1650.3316  | 2.2167      | 89.9965   |
| 34  | A    | 1662.5044  | 14.2059     | 16.7243   |
| 35  | A    | 1715.5037  | 10.8352     | 219.9974  |
| 36  | A    | 2384.2672  | 42.4338     | 64.8913   |
| 37  | A    | 3237.2908  | 6.7553      | 2.3651    |
| 38  | A    | 3640.5526  | 8.1691      | 117.0031  |
| 39  | A    | 3757.6308  | 9.1811      | 63.2927   |

molC\_x3lyp

| NM# | Symm | Wavenumber | Force Const | IR Intens |
|-----|------|------------|-------------|-----------|
| 1   | A    | 96.1651    | 0.0474      | 0.3133    |
| 2   | A    | 134.1032   | 0.1377      | 3.4429    |
| 3   | A    | 156.3512   | 0.1388      | 0.2579    |
| 4   | A    | 167.2314   | 0.2216      | 4.1695    |
| 5   | A    | 282.5329   | 0.1786      | 5.2487    |
| 6   | A    | 289.3623   | 0.7372      | 0.9261    |
| 7   | A    | 294.9054   | 0.2551      | 15.9218   |
| 8   | A    | 321.2388   | 0.7738      | 4.3541    |
| 9   | A    | 362.7175   | 0.1194      | 245.0284  |

ESI-99

|    |   |           |         |          |
|----|---|-----------|---------|----------|
| 10 | A | 370.8548  | 0.2959  | 53.2594  |
| 11 | A | 415.8758  | 0.8503  | 2.1024   |
| 12 | A | 423.5780  | 0.1230  | 6.9236   |
| 13 | A | 468.8717  | 1.2674  | 1.2848   |
| 14 | A | 488.1842  | 1.6239  | 2.6424   |
| 15 | A | 495.0670  | 1.2872  | 0.7327   |
| 16 | A | 544.5573  | 2.4103  | 3.0621   |
| 17 | A | 573.7517  | 0.9536  | 4.7369   |
| 18 | A | 685.1992  | 3.1548  | 1.1547   |
| 19 | A | 699.9416  | 1.3365  | 1.0011   |
| 20 | A | 729.8948  | 3.0774  | 1.6201   |
| 21 | A | 736.6741  | 2.4349  | 18.4410  |
| 22 | A | 884.8203  | 0.6385  | 21.5215  |
| 23 | A | 912.2392  | 2.0085  | 71.7057  |
| 24 | A | 999.2440  | 2.7965  | 49.2250  |
| 25 | A | 1139.3689 | 3.4147  | 20.4952  |
| 26 | A | 1171.5114 | 1.7937  | 155.0997 |
| 27 | A | 1229.4752 | 1.6229  | 9.2205   |
| 28 | A | 1299.5298 | 5.9306  | 20.5236  |
| 29 | A | 1351.9135 | 6.6190  | 49.2364  |
| 30 | A | 1401.0202 | 11.2410 | 64.9294  |
| 31 | A | 1520.4690 | 11.7898 | 208.4125 |
| 32 | A | 1551.6819 | 7.2416  | 227.9699 |
| 33 | A | 1623.0799 | 13.2127 | 20.6259  |
| 34 | A | 1637.9669 | 2.2160  | 40.4757  |
| 35 | A | 1685.8833 | 7.9185  | 244.6866 |
| 36 | A | 2343.3828 | 40.9897 | 70.9926  |
| 37 | A | 3221.8293 | 6.6848  | 2.4640   |
| 38 | A | 3603.9925 | 8.0018  | 127.5993 |
| 39 | A | 3718.3548 | 8.9930  | 65.1702  |

-----

mold\_apfd

| NM# | Symm | Wavenumber | Force Const | IR Intens |
|-----|------|------------|-------------|-----------|
| 1   | A    | 78.9232    | 0.0572      | 1.6842    |
| 2   | A    | 126.5108   | 0.1192      | 4.9343    |
| 3   | A    | 127.9376   | 0.1086      | 0.4375    |
| 4   | A    | 141.4082   | 0.1765      | 1.8197    |
| 5   | A    | 195.3909   | 0.1938      | 0.3913    |
| 6   | A    | 207.7249   | 0.4825      | 0.6007    |
| 7   | A    | 283.5809   | 0.6963      | 0.9774    |
| 8   | A    | 311.7151   | 0.0933      | 186.8651  |
| 9   | A    | 315.1428   | 0.3031      | 14.1389   |
| 10  | A    | 316.1455   | 0.4228      | 11.2280   |
| 11  | A    | 322.9050   | 0.2381      | 55.3190   |
| 12  | A    | 376.5829   | 1.1996      | 2.7992    |
| 13  | A    | 381.7936   | 0.3337      | 1.3756    |
| 14  | A    | 425.4348   | 0.1451      | 4.3877    |
| 15  | A    | 447.0388   | 1.3721      | 0.6502    |
| 16  | A    | 502.3130   | 1.2123      | 1.1777    |
| 17  | A    | 508.2763   | 1.6114      | 1.2022    |
| 18  | A    | 538.5030   | 1.6193      | 5.6764    |
| 19  | A    | 550.6024   | 2.6367      | 1.8861    |
| 20  | A    | 642.4739   | 2.9276      | 1.8962    |

ESI-100

|    |   |           |         |          |
|----|---|-----------|---------|----------|
| 21 | A | 687.2045  | 3.2080  | 0.2536   |
| 22 | A | 741.6253  | 3.7595  | 0.9128   |
| 23 | A | 757.1116  | 1.9137  | 0.9470   |
| 24 | A | 873.7031  | 3.6154  | 81.4475  |
| 25 | A | 996.3554  | 3.5997  | 113.3888 |
| 26 | A | 1048.0256 | 5.0820  | 55.3484  |
| 27 | A | 1165.0966 | 1.9097  | 28.1062  |
| 28 | A | 1197.0406 | 4.4703  | 15.0665  |
| 29 | A | 1326.2280 | 10.2233 | 51.2941  |
| 30 | A | 1357.3785 | 8.9689  | 54.8492  |
| 31 | A | 1467.1443 | 13.0237 | 58.8653  |
| 32 | A | 1506.8784 | 10.8471 | 32.8133  |
| 33 | A | 1544.6985 | 10.3804 | 461.0059 |
| 34 | A | 1631.1034 | 5.3861  | 26.9222  |
| 35 | A | 1658.2643 | 3.0098  | 125.4927 |
| 36 | A | 1698.6362 | 10.5020 | 114.4059 |
| 37 | A | 2349.3172 | 41.1592 | 58.7876  |
| 38 | A | 3616.4483 | 8.0676  | 95.6703  |
| 39 | A | 3738.5303 | 9.0891  | 67.9643  |

-----

molD\_b3lypd

| NM# | Symm | Wavenumber | Force Const | IR Intens |
|-----|------|------------|-------------|-----------|
| 1   | A    | 78.3352    | 0.0564      | 1.7408    |
| 2   | A    | 126.4168   | 0.1185      | 4.9988    |
| 3   | A    | 127.5870   | 0.1082      | 0.4416    |
| 4   | A    | 140.0103   | 0.1693      | 2.0531    |
| 5   | A    | 193.4313   | 0.1904      | 0.4969    |
| 6   | A    | 206.8268   | 0.4742      | 0.6344    |
| 7   | A    | 284.1519   | 0.6464      | 0.9597    |
| 8   | A    | 310.6408   | 0.3894      | 4.5334    |
| 9   | A    | 312.4897   | 0.5442      | 1.2562    |
| 10  | A    | 313.6847   | 0.2374      | 40.1837   |
| 11  | A    | 325.3447   | 0.0885      | 221.2238  |
| 12  | A    | 373.3933   | 1.1963      | 3.4939    |
| 13  | A    | 376.1825   | 0.4095      | 1.6944    |
| 14  | A    | 423.6906   | 0.1356      | 4.5246    |
| 15  | A    | 443.1515   | 1.3688      | 0.5709    |
| 16  | A    | 495.3161   | 1.1274      | 1.1346    |
| 17  | A    | 501.2684   | 1.5668      | 1.2155    |
| 18  | A    | 531.9327   | 1.5694      | 6.5708    |
| 19  | A    | 545.8605   | 2.5458      | 1.8708    |
| 20  | A    | 638.3434   | 2.8900      | 1.8738    |
| 21  | A    | 680.0941   | 3.1428      | 0.1851    |
| 22  | A    | 743.6636   | 3.7895      | 1.0999    |
| 23  | A    | 752.9944   | 1.8969      | 0.9835    |
| 24  | A    | 856.7454   | 3.6449      | 86.5390   |
| 25  | A    | 980.7924   | 3.6475      | 122.0956  |
| 26  | A    | 1029.0045  | 5.2712      | 54.8237   |
| 27  | A    | 1150.8294  | 2.4409      | 20.9023   |
| 28  | A    | 1175.3146  | 2.8162      | 24.6113   |
| 29  | A    | 1308.6879  | 10.2923     | 52.3305   |
| 30  | A    | 1332.2398  | 7.9003      | 41.8033   |
| 31  | A    | 1439.1977  | 12.5307     | 46.8268   |

ESI-101

|    |   |           |         |          |
|----|---|-----------|---------|----------|
| 32 | A | 1484.6369 | 11.1167 | 35.5116  |
| 33 | A | 1519.5530 | 11.4103 | 472.3314 |
| 34 | A | 1605.7456 | 9.6119  | 10.6148  |
| 35 | A | 1647.8843 | 2.5098  | 97.8518  |
| 36 | A | 1677.3364 | 7.1787  | 127.5832 |
| 37 | A | 2330.3220 | 40.5022 | 57.4965  |
| 38 | A | 3593.1870 | 7.9598  | 91.1445  |
| 39 | A | 3710.7655 | 8.9540  | 63.6258  |

-----

molD\_blyp

| NM# | Symm | Wavenumber | Force Const | IR Intens |
|-----|------|------------|-------------|-----------|
| 1   | A    | 74.6614    | 0.0505      | 1.8244    |
| 2   | A    | 121.3281   | 0.0955      | 0.7534    |
| 3   | A    | 122.7130   | 0.1131      | 4.5526    |
| 4   | A    | 133.6926   | 0.1502      | 2.3136    |
| 5   | A    | 185.8135   | 0.1835      | 0.4489    |
| 6   | A    | 198.6123   | 0.4352      | 0.6252    |
| 7   | A    | 274.9357   | 0.6267      | 0.6921    |
| 8   | A    | 297.3904   | 0.4600      | 1.3967    |
| 9   | A    | 298.9721   | 0.4369      | 0.8834    |
| 10  | A    | 304.5084   | 0.3637      | 4.5738    |
| 11  | A    | 342.0798   | 0.0960      | 202.2356  |
| 12  | A    | 353.8883   | 0.3087      | 41.9546   |
| 13  | A    | 359.0523   | 0.8809      | 12.1030   |
| 14  | A    | 411.4451   | 0.1238      | 4.9499    |
| 15  | A    | 426.6450   | 1.2128      | 1.1852    |
| 16  | A    | 472.2355   | 0.9618      | 0.9807    |
| 17  | A    | 481.2625   | 1.4354      | 1.2278    |
| 18  | A    | 507.3235   | 1.4452      | 7.7813    |
| 19  | A    | 524.5008   | 2.2050      | 2.2989    |
| 20  | A    | 606.5046   | 2.6064      | 1.3120    |
| 21  | A    | 644.0070   | 2.8079      | 0.2649    |
| 22  | A    | 706.4128   | 3.3966      | 0.6866    |
| 23  | A    | 724.8713   | 1.7972      | 0.5734    |
| 24  | A    | 816.1890   | 3.4218      | 89.6850   |
| 25  | A    | 934.1099   | 3.5870      | 124.2163  |
| 26  | A    | 981.3704   | 4.7991      | 48.2561   |
| 27  | A    | 1096.3633  | 4.6302      | 4.9871    |
| 28  | A    | 1127.9016  | 1.6052      | 36.8965   |
| 29  | A    | 1244.3064  | 9.4911      | 46.9824   |
| 30  | A    | 1299.6088  | 7.7005      | 37.6973   |
| 31  | A    | 1365.8501  | 11.2869     | 47.2433   |
| 32  | A    | 1415.9016  | 10.5085     | 29.3374   |
| 33  | A    | 1446.9099  | 10.5887     | 433.1631  |
| 34  | A    | 1524.4243  | 11.0561     | 11.6160   |
| 35  | A    | 1584.8322  | 5.0333      | 39.8939   |
| 36  | A    | 1612.3673  | 2.4149      | 153.0039  |
| 37  | A    | 2219.0873  | 36.7084     | 51.5702   |
| 38  | A    | 3488.9836  | 7.5029      | 76.3073   |
| 39  | A    | 3601.4212  | 8.4288      | 53.1750   |

-----

molD\_camb3lypd

| NM# | Symm | Wavenumber | Force Const | IR Intens |
|-----|------|------------|-------------|-----------|
| 1   | A    | 80.0367    | 0.0607      | 1.1341    |
| 2   | A    | 127.4514   | 0.1216      | 4.8584    |
| 3   | A    | 130.4383   | 0.1256      | 0.3892    |
| 4   | A    | 143.0361   | 0.1982      | 0.8682    |
| 5   | A    | 197.0129   | 0.1711      | 0.6644    |
| 6   | A    | 207.7023   | 0.4780      | 0.6599    |
| 7   | A    | 249.9609   | 0.0448      | 257.8639  |
| 8   | A    | 285.2594   | 0.6442      | 1.4594    |
| 9   | A    | 313.6001   | 0.2940      | 2.7726    |
| 10  | A    | 318.5863   | 0.7239      | 4.3338    |
| 11  | A    | 319.5148   | 0.5834      | 0.3391    |
| 12  | A    | 377.9662   | 1.2644      | 2.3729    |
| 13  | A    | 389.5915   | 0.3848      | 0.7300    |
| 14  | A    | 432.0421   | 0.1436      | 3.6483    |
| 15  | A    | 448.5059   | 1.4319      | 0.2716    |
| 16  | A    | 507.0153   | 1.4849      | 1.4155    |
| 17  | A    | 508.4099   | 1.2705      | 1.1534    |
| 18  | A    | 541.2145   | 1.6367      | 5.0513    |
| 19  | A    | 551.7863   | 2.7166      | 1.7053    |
| 20  | A    | 658.2523   | 3.0707      | 2.1290    |
| 21  | A    | 700.2404   | 3.3158      | 0.1732    |
| 22  | A    | 761.0457   | 1.8594      | 1.5218    |
| 23  | A    | 771.0091   | 4.0873      | 1.4502    |
| 24  | A    | 872.2737   | 3.6305      | 78.5008   |
| 25  | A    | 999.2865   | 3.5026      | 118.5772  |
| 26  | A    | 1048.2066  | 5.4141      | 63.4267   |
| 27  | A    | 1161.7168  | 1.8544      | 41.3260   |
| 28  | A    | 1195.9236  | 5.4704      | 11.5306   |
| 29  | A    | 1316.2980  | 7.9345      | 87.0390   |
| 30  | A    | 1335.3612  | 9.7003      | 24.0663   |
| 31  | A    | 1473.8645  | 12.2995     | 37.0226   |
| 32  | A    | 1517.4933  | 11.2386     | 48.9105   |
| 33  | A    | 1553.2711  | 10.9702     | 461.6373  |
| 34  | A    | 1642.8778  | 3.6119      | 57.1691   |
| 35  | A    | 1666.6654  | 3.7909      | 133.1243  |
| 36  | A    | 1717.5712  | 14.9676     | 99.6758   |
| 37  | A    | 2392.2509  | 42.7090     | 55.9559   |
| 38  | A    | 3624.1599  | 8.0959      | 111.2940  |
| 39  | A    | 3743.0137  | 9.1199      | 74.6701   |

molD\_m062x

| NM# | Symm | Wavenumber | Force Const | IR Intens |
|-----|------|------------|-------------|-----------|
| 1   | A    | 80.3888    | 0.0588      | 1.8489    |
| 2   | A    | 124.7762   | 0.1168      | 4.5604    |
| 3   | A    | 131.5596   | 0.1101      | 0.6611    |
| 4   | A    | 143.8510   | 0.1738      | 2.3957    |
| 5   | A    | 195.4728   | 0.1903      | 0.5877    |
| 6   | A    | 206.1057   | 0.4762      | 0.6073    |
| 7   | A    | 283.1960   | 0.6587      | 0.9897    |
| 8   | A    | 314.6612   | 0.3075      | 2.5131    |

|    |   |           |         |          |
|----|---|-----------|---------|----------|
| 9  | A | 317.1308  | 0.5376  | 8.3930   |
| 10 | A | 317.5730  | 0.5459  | 4.4005   |
| 11 | A | 342.5914  | 0.0897  | 263.9357 |
| 12 | A | 376.8473  | 1.1332  | 5.2394   |
| 13 | A | 386.3115  | 0.1914  | 7.0212   |
| 14 | A | 416.5891  | 0.1888  | 4.1653   |
| 15 | A | 445.4903  | 1.3772  | 0.7977   |
| 16 | A | 502.5097  | 1.3241  | 0.9189   |
| 17 | A | 507.3657  | 1.6271  | 1.3096   |
| 18 | A | 540.8223  | 1.5510  | 6.4005   |
| 19 | A | 551.9115  | 2.6725  | 2.1543   |
| 20 | A | 642.6910  | 2.9361  | 2.3362   |
| 21 | A | 688.9985  | 3.2275  | 0.1471   |
| 22 | A | 731.8401  | 3.6821  | 1.0243   |
| 23 | A | 756.8804  | 1.9382  | 1.2371   |
| 24 | A | 875.8039  | 3.6399  | 78.8676  |
| 25 | A | 1007.6936 | 3.3590  | 103.9125 |
| 26 | A | 1054.8313 | 5.7599  | 60.0502  |
| 27 | A | 1168.2863 | 1.7445  | 38.4731  |
| 28 | A | 1214.9838 | 6.2186  | 10.8771  |
| 29 | A | 1320.1797 | 7.7885  | 77.3841  |
| 30 | A | 1340.6541 | 9.5736  | 24.1150  |
| 31 | A | 1487.7497 | 12.0837 | 32.6666  |
| 32 | A | 1523.4686 | 10.7468 | 64.2840  |
| 33 | A | 1565.5893 | 11.3340 | 456.6828 |
| 34 | A | 1644.3047 | 2.5924  | 113.8278 |
| 35 | A | 1671.6130 | 6.4929  | 80.5941  |
| 36 | A | 1719.3907 | 15.7843 | 79.1490  |
| 37 | A | 2402.7874 | 43.0919 | 47.9548  |
| 38 | A | 3611.7955 | 8.0461  | 107.8113 |
| 39 | A | 3733.0048 | 9.0617  | 75.8335  |

-----

molD\_mp2

| NM# | Symm | Wavenumber | Force Const | IR Intens |
|-----|------|------------|-------------|-----------|
| 1   | A    | 78.2976    | 0.0550      | 1.7921    |
| 2   | A    | 118.2606   | 0.1038      | 4.2426    |
| 3   | A    | 128.2172   | 0.1017      | 0.8862    |
| 4   | A    | 135.9671   | 0.1355      | 3.3093    |
| 5   | A    | 194.6986   | 0.2017      | 0.7900    |
| 6   | A    | 206.6873   | 0.4686      | 0.6617    |
| 7   | A    | 282.7064   | 0.5351      | 1.1902    |
| 8   | A    | 305.9995   | 0.4160      | 1.1298    |
| 9   | A    | 309.6071   | 0.3376      | 0.8398    |
| 10  | A    | 316.4971   | 0.7302      | 1.7901    |
| 11  | A    | 348.3419   | 0.0884      | 13.4984   |
| 12  | A    | 375.1195   | 1.1053      | 1.9755    |
| 13  | A    | 394.9780   | 0.5626      | 6.4630    |
| 14  | A    | 436.6063   | 1.2951      | 0.1616    |
| 15  | A    | 447.7837   | 0.9885      | 2.2242    |
| 16  | A    | 486.1185   | 1.5369      | 0.3938    |
| 17  | A    | 527.2766   | 1.6054      | 4.2095    |
| 18  | A    | 547.7315   | 1.7326      | 24.6188   |
| 19  | A    | 586.9582   | 0.5931      | 91.3699   |

ESI-104



|    |   |           |         |          |
|----|---|-----------|---------|----------|
| 20 | A | 603.4644  | 0.4638  | 189.5975 |
| 21 | A | 666.8002  | 2.6781  | 11.4641  |
| 22 | A | 743.2898  | 2.0298  | 0.4545   |
| 23 | A | 797.5865  | 4.3950  | 1.9218   |
| 24 | A | 871.3989  | 3.6018  | 78.9242  |
| 25 | A | 989.3437  | 4.2959  | 117.0855 |
| 26 | A | 1041.3860 | 5.6925  | 28.7619  |
| 27 | A | 1166.8168 | 4.0188  | 5.1540   |
| 28 | A | 1203.1155 | 1.7139  | 23.8483  |
| 29 | A | 1313.2230 | 9.8313  | 39.4182  |
| 30 | A | 1447.1983 | 12.7002 | 44.6642  |
| 31 | A | 1472.7478 | 11.9853 | 8.4768   |
| 32 | A | 1507.4277 | 11.4261 | 41.5043  |
| 33 | A | 1535.2533 | 12.2570 | 467.6261 |
| 34 | A | 1630.7581 | 5.4781  | 9.3871   |
| 35 | A | 1660.4566 | 2.8657  | 68.0373  |
| 36 | A | 1691.9686 | 8.7784  | 54.6275  |
| 37 | A | 2175.5768 | 35.1441 | 1.3774   |
| 38 | A | 3586.4026 | 7.9418  | 64.4204  |
| 39 | A | 3705.1324 | 8.8986  | 48.6968  |

-----  
molD\_pbe0d

| NM# | Symm | Wavenumber | Force Const | IR Intens |
|-----|------|------------|-------------|-----------|
| 1   | A    | 79.3839    | 0.0577      | 1.7610    |
| 2   | A    | 125.0786   | 0.1155      | 4.9850    |
| 3   | A    | 129.0179   | 0.1094      | 0.4927    |
| 4   | A    | 142.2866   | 0.1755      | 1.9793    |
| 5   | A    | 196.2641   | 0.1939      | 0.4351    |
| 6   | A    | 206.6025   | 0.4745      | 0.5945    |
| 7   | A    | 281.7925   | 0.5747      | 1.1847    |
| 8   | A    | 311.1011   | 0.2417      | 8.5140    |
| 9   | A    | 315.4622   | 0.4749      | 23.7696   |
| 10  | A    | 317.3272   | 0.5595      | 0.6120    |
| 11  | A    | 329.0164   | 0.0870      | 237.5800  |
| 12  | A    | 377.1766   | 1.2147      | 3.0986    |
| 13  | A    | 383.3987   | 0.3452      | 1.5293    |
| 14  | A    | 426.1574   | 0.1458      | 4.4046    |
| 15  | A    | 443.4207   | 1.3418      | 0.6274    |
| 16  | A    | 503.0615   | 1.2356      | 1.1162    |
| 17  | A    | 505.7558   | 1.5909      | 0.9858    |
| 18  | A    | 540.0459   | 1.6229      | 6.1143    |
| 19  | A    | 552.4992   | 2.6210      | 1.9137    |
| 20  | A    | 643.6479   | 2.9387      | 1.9938    |
| 21  | A    | 688.8107   | 3.2326      | 0.2245    |
| 22  | A    | 742.9266   | 3.7741      | 0.9302    |
| 23  | A    | 757.8079   | 1.9035      | 0.9508    |
| 24  | A    | 876.7448   | 3.6054      | 79.4740   |
| 25  | A    | 1002.2728  | 3.5326      | 109.3212  |
| 26  | A    | 1051.9142  | 5.4011      | 57.4814   |
| 27  | A    | 1167.3521  | 1.8215      | 29.0037   |
| 28  | A    | 1203.7668  | 5.1576      | 12.5352   |
| 29  | A    | 1333.3013  | 10.2464     | 51.5329   |
| 30  | A    | 1366.3890  | 9.2341      | 55.2782   |

ESI-105

|    |   |           |         |          |
|----|---|-----------|---------|----------|
| 31 | A | 1477.7727 | 12.6400 | 53.4707  |
| 32 | A | 1515.6134 | 10.6905 | 37.1467  |
| 33 | A | 1556.3283 | 10.0700 | 458.4816 |
| 34 | A | 1636.2062 | 3.8184  | 57.2148  |
| 35 | A | 1661.3781 | 3.7181  | 124.5167 |
| 36 | A | 1710.2029 | 13.8456 | 97.5398  |
| 37 | A | 2360.0356 | 41.5208 | 59.7597  |
| 38 | A | 3625.8523 | 8.1086  | 94.9478  |
| 39 | A | 3748.6718 | 9.1364  | 68.5487  |

molD\_pbe

| NM# | Symm | Wavenumber | Force Const | IR Intens |
|-----|------|------------|-------------|-----------|
| 1   | A    | 75.3125    | 0.0516      | 1.7454    |
| 2   | A    | 119.3257   | 0.1047      | 4.7567    |
| 3   | A    | 122.0998   | 0.0988      | 0.5251    |
| 4   | A    | 135.2735   | 0.1561      | 2.0930    |
| 5   | A    | 186.5224   | 0.1823      | 0.3035    |
| 6   | A    | 198.3879   | 0.4380      | 0.5682    |
| 7   | A    | 271.4006   | 0.5414      | 0.9491    |
| 8   | A    | 299.2031   | 0.2922      | 2.7174    |
| 9   | A    | 300.5053   | 0.4156      | 1.3348    |
| 10  | A    | 303.6921   | 0.7194      | 3.1991    |
| 11  | A    | 337.5364   | 0.0834      | 241.5444  |
| 12  | A    | 356.7594   | 0.4263      | 6.9870    |
| 13  | A    | 362.5524   | 1.0864      | 4.5096    |
| 14  | A    | 417.4552   | 0.1324      | 4.2721    |
| 15  | A    | 425.9329   | 0.9981      | 1.3703    |
| 16  | A    | 476.5211   | 0.9536      | 1.0475    |
| 17  | A    | 484.0056   | 1.4522      | 0.7779    |
| 18  | A    | 516.1990   | 1.5083      | 7.1083    |
| 19  | A    | 531.2039   | 2.3162      | 2.1315    |
| 20  | A    | 606.5243   | 2.6025      | 1.3572    |
| 21  | A    | 648.4533   | 2.8622      | 0.3219    |
| 22  | A    | 700.9790   | 3.3256      | 0.5026    |
| 23  | A    | 726.9874   | 1.7881      | 0.5861    |
| 24  | A    | 837.0033   | 3.3427      | 81.2846   |
| 25  | A    | 955.0118   | 3.4895      | 110.5934  |
| 26  | A    | 1004.2118  | 4.7293      | 50.6337   |
| 27  | A    | 1119.9742  | 2.2291      | 15.8737   |
| 28  | A    | 1144.2170  | 2.7058      | 20.6242   |
| 29  | A    | 1267.1225  | 9.3833      | 49.5316   |
| 30  | A    | 1341.9243  | 9.3727      | 48.3324   |
| 31  | A    | 1403.8324  | 11.7747     | 60.5065   |
| 32  | A    | 1444.6374  | 10.7196     | 30.7989   |
| 33  | A    | 1481.8559  | 9.1213      | 418.5132  |
| 34  | A    | 1554.7745  | 7.3783      | 13.5648   |
| 35  | A    | 1592.4472  | 2.3894      | 107.7241  |
| 36  | A    | 1629.9169  | 8.4918      | 118.9641  |
| 37  | A    | 2237.3765  | 37.2791     | 55.0397   |
| 38  | A    | 3508.9585  | 7.5924      | 79.7366   |
| 39  | A    | 3627.7121  | 8.5507      | 58.8001   |

molD\_rtpss

| NM# | Symm | Wavenumber | Force Const | IR Intens |
|-----|------|------------|-------------|-----------|
| 1   | A    | 76.4157    | 0.0520      | 2.1906    |
| 2   | A    | 117.7133   | 0.1017      | 4.6250    |
| 3   | A    | 124.8404   | 0.0975      | 0.9438    |
| 4   | A    | 137.5627   | 0.1492      | 2.9850    |
| 5   | A    | 186.9612   | 0.1841      | 0.5572    |
| 6   | A    | 194.0248   | 0.4244      | 0.5122    |
| 7   | A    | 263.7417   | 0.5015      | 0.9996    |
| 8   | A    | 295.2027   | 0.2244      | 4.0485    |
| 9   | A    | 300.1616   | 0.8573      | 0.6507    |
| 10  | A    | 302.0229   | 0.5571      | 0.1530    |
| 11  | A    | 355.9454   | 0.3158      | 3.9422    |
| 12  | A    | 363.2951   | 1.1585      | 1.8294    |
| 13  | A    | 401.6437   | 0.1247      | 13.6665   |
| 14  | A    | 423.5555   | 1.1881      | 4.9473    |
| 15  | A    | 457.0537   | 0.1736      | 254.0855  |
| 16  | A    | 476.5026   | 1.1578      | 2.5875    |
| 17  | A    | 484.1087   | 1.3548      | 6.5541    |
| 18  | A    | 517.5225   | 1.3595      | 15.2032   |
| 19  | A    | 537.0350   | 1.5102      | 14.7748   |
| 20  | A    | 605.2121   | 2.5994      | 1.4580    |
| 21  | A    | 644.4121   | 2.8974      | 0.0978    |
| 22  | A    | 684.7025   | 3.2059      | 0.7098    |
| 23  | A    | 727.9858   | 1.8876      | 0.2967    |
| 24  | A    | 840.0063   | 3.4460      | 87.4712   |
| 25  | A    | 959.1384   | 3.8715      | 121.7003  |
| 26  | A    | 1007.3711  | 5.2160      | 39.8046   |
| 27  | A    | 1127.7882  | 4.2475      | 4.7096    |
| 28  | A    | 1158.9319  | 1.6740      | 32.3058   |
| 29  | A    | 1269.8293  | 9.5899      | 45.9541   |
| 30  | A    | 1348.7612  | 8.8697      | 43.7574   |
| 31  | A    | 1409.4247  | 11.8626     | 46.4430   |
| 32  | A    | 1455.4112  | 10.8221     | 32.6654   |
| 33  | A    | 1489.1769  | 11.0162     | 446.2392  |
| 34  | A    | 1572.4855  | 10.3688     | 8.8540    |
| 35  | A    | 1625.7534  | 3.1959      | 50.7100   |
| 36  | A    | 1649.8483  | 3.8345      | 126.6436  |
| 37  | A    | 2251.8327  | 37.7714     | 51.5637   |
| 38  | A    | 3496.9775  | 7.5441      | 51.9521   |
| 39  | A    | 3610.3004  | 8.4568      | 42.1643   |

molD\_wb97xd

| NM# | Symm | Wavenumber | Force Const | IR Intens |
|-----|------|------------|-------------|-----------|
| 1   | A    | 79.5671    | 0.0580      | 1.7832    |
| 2   | A    | 129.1630   | 0.1105      | 3.2450    |
| 3   | A    | 129.2807   | 0.1243      | 2.0187    |
| 4   | A    | 142.2084   | 0.1770      | 1.8964    |
| 5   | A    | 197.9841   | 0.1953      | 0.4994    |
| 6   | A    | 207.7905   | 0.4763      | 0.6359    |
| 7   | A    | 286.2495   | 0.6044      | 1.3578    |

|    |   |           |         |          |
|----|---|-----------|---------|----------|
| 8  | A | 310.1435  | 0.0909  | 188.2270 |
| 9  | A | 313.8991  | 0.2843  | 11.2360  |
| 10 | A | 318.5269  | 0.5862  | 0.0453   |
| 11 | A | 321.4604  | 0.2267  | 75.3074  |
| 12 | A | 376.5913  | 1.2395  | 3.0313   |
| 13 | A | 386.7494  | 0.2143  | 2.4434   |
| 14 | A | 419.4079  | 0.1774  | 3.5230   |
| 15 | A | 446.2772  | 1.4038  | 0.4350   |
| 16 | A | 503.7972  | 1.2962  | 1.2233   |
| 17 | A | 506.1204  | 1.6157  | 1.2646   |
| 18 | A | 538.0994  | 1.6139  | 5.8347   |
| 19 | A | 549.8257  | 2.5752  | 1.8365   |
| 20 | A | 650.0993  | 3.0022  | 1.9132   |
| 21 | A | 692.7905  | 3.2516  | 0.1895   |
| 22 | A | 751.4460  | 3.8681  | 1.0390   |
| 23 | A | 760.1262  | 1.8987  | 1.0979   |
| 24 | A | 869.7967  | 3.6947  | 81.7297  |
| 25 | A | 997.4664  | 3.5172  | 114.7516 |
| 26 | A | 1043.9221 | 5.6809  | 61.7496  |
| 27 | A | 1163.3355 | 1.8503  | 37.1362  |
| 28 | A | 1196.4340 | 4.9498  | 14.9331  |
| 29 | A | 1321.2091 | 8.9352  | 106.5780 |
| 30 | A | 1331.2941 | 8.5323  | 4.2389   |
| 31 | A | 1470.5585 | 12.6340 | 43.3643  |
| 32 | A | 1513.6631 | 10.9894 | 43.9484  |
| 33 | A | 1551.7553 | 11.0580 | 472.1532 |
| 34 | A | 1642.2795 | 3.9075  | 46.1769  |
| 35 | A | 1667.6088 | 3.5442  | 125.2407 |
| 36 | A | 1713.7562 | 13.6362 | 96.7227  |
| 37 | A | 2375.9083 | 42.1159 | 54.5353  |
| 38 | A | 3633.6400 | 8.1441  | 91.6543  |
| 39 | A | 3754.8204 | 9.1675  | 65.3887  |

-----

molD\_x31yp

-----

| NM# | Symm | Wavenumber | Force Const | IR Intens |
|-----|------|------------|-------------|-----------|
| 1   | A    | 78.7418    | 0.0569      | 1.6894    |
| 2   | A    | 126.8390   | 0.1195      | 4.9482    |
| 3   | A    | 128.2416   | 0.1100      | 0.4302    |
| 4   | A    | 140.8026   | 0.1739      | 1.8859    |
| 5   | A    | 194.9239   | 0.1935      | 0.4815    |
| 6   | A    | 205.4073   | 0.4654      | 0.6487    |
| 7   | A    | 283.7438   | 0.6396      | 1.1012    |
| 8   | A    | 307.9141   | 0.1017      | 169.3222  |
| 9   | A    | 310.2459   | 0.2505      | 13.6593   |
| 10  | A    | 314.4992   | 0.5585      | 0.7292    |
| 11  | A    | 318.5280   | 0.1847      | 82.5258   |
| 12  | A    | 372.9186   | 1.2191      | 3.2272    |
| 13  | A    | 377.9293   | 0.3997      | 1.2288    |
| 14  | A    | 424.3309   | 0.1363      | 4.5474    |
| 15  | A    | 442.9110   | 1.3735      | 0.4756    |
| 16  | A    | 497.9412   | 1.1689      | 1.1335    |
| 17  | A    | 501.4049   | 1.5672      | 1.2394    |
| 18  | A    | 530.3071   | 1.5783      | 6.2811    |

ESI-108

|    |   |           |         |          |
|----|---|-----------|---------|----------|
| 19 | A | 544.9771  | 2.5155  | 1.7016   |
| 20 | A | 641.3280  | 2.9177  | 1.8665   |
| 21 | A | 683.5671  | 3.1640  | 0.2190   |
| 22 | A | 747.2504  | 3.8179  | 1.0744   |
| 23 | A | 753.1971  | 1.8811  | 0.9418   |
| 24 | A | 856.3468  | 3.6556  | 85.5675  |
| 25 | A | 981.7270  | 3.5573  | 118.3440 |
| 26 | A | 1028.6938 | 5.4051  | 58.1529  |
| 27 | A | 1150.8236 | 2.3192  | 23.2259  |
| 28 | A | 1175.8735 | 3.0282  | 23.4927  |
| 29 | A | 1308.2656 | 10.3679 | 55.1866  |
| 30 | A | 1330.0329 | 7.8315  | 39.8643  |
| 31 | A | 1440.1244 | 12.3867 | 43.9886  |
| 32 | A | 1486.1073 | 11.2164 | 38.2969  |
| 33 | A | 1521.1922 | 11.4221 | 477.6591 |
| 34 | A | 1608.8554 | 9.5407  | 11.0105  |
| 35 | A | 1649.6223 | 2.4978  | 103.5194 |
| 36 | A | 1679.7701 | 7.4634  | 125.2119 |
| 37 | A | 2335.2960 | 40.6842 | 57.2003  |
| 38 | A | 3597.7069 | 7.9795  | 95.1810  |
| 39 | A | 3715.0702 | 8.9765  | 64.8921  |

-----

molE\_apfd

| NM# | Symm | Wavenumber | Force Const | IR Intens |
|-----|------|------------|-------------|-----------|
| 1   | A    | 78.4199    | 0.0574      | 0.8078    |
| 2   | A    | 127.9433   | 0.1223      | 4.0234    |
| 3   | A    | 130.8314   | 0.1364      | 2.0360    |
| 4   | A    | 184.4420   | 0.1846      | 0.4670    |
| 5   | A    | 218.6445   | 0.4202      | 0.7877    |
| 6   | A    | 226.4175   | 0.0354      | 242.9535  |
| 7   | A    | 245.5911   | 0.2306      | 0.0420    |
| 8   | A    | 307.5770   | 0.2780      | 3.1309    |
| 9   | A    | 322.8657   | 1.1044      | 2.2633    |
| 10  | A    | 368.2270   | 0.7921      | 6.0742    |
| 11  | A    | 372.1930   | 0.4862      | 0.8209    |
| 12  | A    | 450.5835   | 0.9520      | 0.3251    |
| 13  | A    | 454.2495   | 0.1557      | 2.8075    |
| 14  | A    | 505.5870   | 1.3883      | 0.0997    |
| 15  | A    | 518.7328   | 1.0024      | 1.0829    |
| 16  | A    | 538.2265   | 1.5979      | 4.4572    |
| 17  | A    | 599.1975   | 0.7752      | 4.0328    |
| 18  | A    | 664.2171   | 2.2915      | 0.1856    |
| 19  | A    | 678.1342   | 1.4462      | 4.3099    |
| 20  | A    | 689.7092   | 2.1984      | 7.0503    |
| 21  | A    | 757.8249   | 2.9479      | 0.0335    |
| 22  | A    | 824.7586   | 0.6120      | 31.9941   |
| 23  | A    | 844.1340   | 1.9448      | 63.8915   |
| 24  | A    | 991.3428   | 2.6496      | 48.0152   |
| 25  | A    | 1120.5902  | 4.7806      | 83.4187   |
| 26  | A    | 1169.1204  | 1.5658      | 9.2507    |
| 27  | A    | 1202.2485  | 1.2637      | 32.0841   |
| 28  | A    | 1290.0853  | 9.0156      | 72.9007   |
| 29  | A    | 1356.5040  | 9.1777      | 8.7148    |

ESI-109

|    |   |           |         |          |
|----|---|-----------|---------|----------|
| 30 | A | 1394.1764 | 10.5428 | 40.6717  |
| 31 | A | 1511.5478 | 6.9155  | 17.3657  |
| 32 | A | 1538.0557 | 7.8482  | 310.9961 |
| 33 | A | 1625.1810 | 5.7912  | 8.2196   |
| 34 | A | 1654.4574 | 3.2475  | 109.4500 |
| 35 | A | 1687.2981 | 7.2010  | 350.1230 |
| 36 | A | 2346.5487 | 41.0611 | 66.4232  |
| 37 | A | 3244.3565 | 6.7814  | 7.2269   |
| 38 | A | 3622.7620 | 8.0932  | 107.1793 |
| 39 | A | 3748.8385 | 9.1465  | 74.4429  |

-----

molE\_b3lypd

| NM# | Symm | Wavenumber | Force Const | IR Intens |
|-----|------|------------|-------------|-----------|
| 1   | A    | 78.3274    | 0.0569      | 1.1965    |
| 2   | A    | 127.9221   | 0.1204      | 4.5950    |
| 3   | A    | 131.4434   | 0.1249      | 1.4717    |
| 4   | A    | 182.5562   | 0.1848      | 0.2800    |
| 5   | A    | 216.7322   | 0.4219      | 0.3898    |
| 6   | A    | 244.3956   | 0.2098      | 0.5794    |
| 7   | A    | 253.2227   | 0.0455      | 244.9780  |
| 8   | A    | 302.6020   | 0.2556      | 3.4603    |
| 9   | A    | 318.3196   | 1.0328      | 3.2545    |
| 10  | A    | 364.2704   | 0.8255      | 6.5738    |
| 11  | A    | 367.4118   | 0.5156      | 0.3689    |
| 12  | A    | 450.3957   | 0.1526      | 3.2185    |
| 13  | A    | 453.6450   | 0.9692      | 0.5939    |
| 14  | A    | 499.9684   | 1.3930      | 0.1686    |
| 15  | A    | 511.2503   | 0.9242      | 1.0797    |
| 16  | A    | 533.5900   | 1.5698      | 5.0534    |
| 17  | A    | 594.2994   | 0.7566      | 3.9475    |
| 18  | A    | 657.6648   | 2.3704      | 0.2710    |
| 19  | A    | 673.5427   | 1.4112      | 5.3233    |
| 20  | A    | 684.5312   | 2.1813      | 7.5541    |
| 21  | A    | 755.9012   | 2.7422      | 0.0220    |
| 22  | A    | 824.3173   | 0.6149      | 31.2119   |
| 23  | A    | 831.6819   | 2.0027      | 70.7863   |
| 24  | A    | 975.0482   | 2.6502      | 46.8300   |
| 25  | A    | 1104.6043  | 5.0929      | 85.6762   |
| 26  | A    | 1160.8816  | 1.6161      | 19.1097   |
| 27  | A    | 1195.7291  | 1.2101      | 30.8047   |
| 28  | A    | 1271.8342  | 8.9480      | 72.8932   |
| 29  | A    | 1332.0786  | 8.4948      | 7.3731    |
| 30  | A    | 1373.2942  | 9.7831      | 31.7400   |
| 31  | A    | 1490.1294  | 7.3405      | 34.9388   |
| 32  | A    | 1516.8071  | 7.4564      | 295.0114  |
| 33  | A    | 1602.8177  | 9.0808      | 26.6283   |
| 34  | A    | 1642.9932  | 3.0657      | 72.7999   |
| 35  | A    | 1668.9481  | 4.6652      | 335.5987  |
| 36  | A    | 2327.6745  | 40.4091     | 65.2079   |
| 37  | A    | 3231.7782  | 6.7269      | 6.3177    |
| 38  | A    | 3598.5698  | 7.9814      | 100.6776  |
| 39  | A    | 3719.6328  | 9.0030      | 68.8457   |

## molE\_blyp

| NM# | Symm | Wavenumber | Force Const | IR Intens |
|-----|------|------------|-------------|-----------|
| 1   | A    | 75.0726    | 0.0513      | 1.6195    |
| 2   | A    | 124.2011   | 0.1123      | 4.6410    |
| 3   | A    | 126.1523   | 0.1016      | 2.1115    |
| 4   | A    | 174.8610   | 0.1777      | 0.1329    |
| 5   | A    | 207.9250   | 0.3880      | 0.3798    |
| 6   | A    | 236.2172   | 0.2164      | 0.0627    |
| 7   | A    | 289.5351   | 0.0624      | 223.4701  |
| 8   | A    | 292.6659   | 0.2340      | 4.0808    |
| 9   | A    | 306.0317   | 0.5834      | 16.2644   |
| 10  | A    | 348.8284   | 0.4762      | 0.9459    |
| 11  | A    | 350.2248   | 0.7748      | 7.4641    |
| 12  | A    | 434.9481   | 0.2139      | 2.5511    |
| 13  | A    | 437.1991   | 0.3024      | 1.8124    |
| 14  | A    | 479.1868   | 1.2801      | 0.2615    |
| 15  | A    | 488.4987   | 0.7846      | 0.9259    |
| 16  | A    | 510.8512   | 1.4036      | 6.4901    |
| 17  | A    | 565.3226   | 0.6850      | 3.3727    |
| 18  | A    | 624.9622   | 2.2018      | 0.1895    |
| 19  | A    | 649.1511   | 1.3180      | 5.5544    |
| 20  | A    | 657.9829   | 2.0721      | 7.1853    |
| 21  | A    | 719.5732   | 2.6378      | 0.0111    |
| 22  | A    | 784.0231   | 0.5444      | 28.5940   |
| 23  | A    | 793.6350   | 1.9674      | 79.4608   |
| 24  | A    | 929.1432   | 2.4929      | 43.4577   |
| 25  | A    | 1050.8781  | 4.9539      | 76.5268   |
| 26  | A    | 1122.1354  | 1.4850      | 28.7182   |
| 27  | A    | 1157.5804  | 1.1419      | 34.2122   |
| 28  | A    | 1213.2144  | 7.8310      | 60.7123   |
| 29  | A    | 1274.6647  | 8.8321      | 13.5104   |
| 30  | A    | 1329.6415  | 8.3626      | 19.9828   |
| 31  | A    | 1427.8649  | 6.8349      | 25.0380   |
| 32  | A    | 1446.8816  | 6.3981      | 266.5906  |
| 33  | A    | 1524.8195  | 10.0946     | 39.9389   |
| 34  | A    | 1578.7490  | 5.6378      | 107.7816  |
| 35  | A    | 1610.3798  | 2.2809      | 239.3890  |
| 36  | A    | 2217.1928  | 36.6444     | 57.3855   |
| 37  | A    | 3152.5880  | 6.3951      | 4.9637    |
| 38  | A    | 3493.9148  | 7.5223      | 83.2903   |
| 39  | A    | 3609.2519  | 8.4704      | 57.2003   |

## molE\_camb3lypd

| NM# | Symm | Wavenumber | Force Const | IR Intens |
|-----|------|------------|-------------|-----------|
| 1   | A    | 72.4366    | 0.0240      | 18.7776   |
| 2   | A    | 105.2838   | 0.0210      | 96.4553   |
| 3   | A    | 129.6156   | 0.1229      | 6.4101    |
| 4   | A    | 153.8027   | 0.0242      | 123.3204  |
| 5   | A    | 186.8040   | 0.2416      | 1.1197    |
| 6   | A    | 218.5441   | 0.4291      | 0.3421    |

|    |   |           |         |          |
|----|---|-----------|---------|----------|
| 7  | A | 249.3099  | 0.2306  | 0.0280   |
| 8  | A | 304.2882  | 0.2578  | 3.6559   |
| 9  | A | 322.2109  | 1.1012  | 2.1013   |
| 10 | A | 368.7980  | 0.8565  | 5.6315   |
| 11 | A | 377.4948  | 0.5487  | 0.3431   |
| 12 | A | 458.9008  | 1.3690  | 0.4170   |
| 13 | A | 462.3167  | 0.1530  | 1.7668   |
| 14 | A | 505.8023  | 1.4297  | 0.0364   |
| 15 | A | 525.1222  | 0.9259  | 0.9270   |
| 16 | A | 542.0815  | 1.6625  | 3.4970   |
| 17 | A | 611.8683  | 0.7763  | 4.1908   |
| 18 | A | 677.4239  | 2.5405  | 0.3240   |
| 19 | A | 680.8179  | 1.4163  | 5.7883   |
| 20 | A | 692.8671  | 2.1969  | 7.2428   |
| 21 | A | 783.1819  | 2.5270  | 0.0048   |
| 22 | A | 844.1886  | 1.8892  | 59.0465  |
| 23 | A | 849.1648  | 0.6850  | 33.5170  |
| 24 | A | 994.5618  | 2.6688  | 49.0866  |
| 25 | A | 1126.0410 | 4.7110  | 101.0775 |
| 26 | A | 1165.3517 | 1.7480  | 12.4415  |
| 27 | A | 1203.3798 | 1.2302  | 31.0566  |
| 28 | A | 1290.9824 | 9.1677  | 88.9622  |
| 29 | A | 1336.2703 | 7.6013  | 5.0644   |
| 30 | A | 1393.2721 | 10.8348 | 31.0664  |
| 31 | A | 1518.3510 | 7.0102  | 41.1902  |
| 32 | A | 1549.3128 | 7.9391  | 295.5664 |
| 33 | A | 1638.7848 | 4.0445  | 8.1034   |
| 34 | A | 1663.2809 | 3.5890  | 165.2718 |
| 35 | A | 1703.5244 | 11.6716 | 326.7994 |
| 36 | A | 2388.9761 | 42.5917 | 64.9717  |
| 37 | A | 3251.1316 | 6.8136  | 8.4683   |
| 38 | A | 3630.1371 | 8.1194  | 124.5719 |
| 39 | A | 3753.2823 | 9.1780  | 82.0319  |

-----

molE\_m062x

| NM# | Symm | Wavenumber | Force Const | IR Intens |
|-----|------|------------|-------------|-----------|
| 1   | A    | 80.1013    | 0.0592      | 1.2807    |
| 2   | A    | 126.5462   | 0.1173      | 4.5247    |
| 3   | A    | 135.5698   | 0.1284      | 1.3998    |
| 4   | A    | 185.8563   | 0.1949      | 0.2211    |
| 5   | A    | 218.4336   | 0.4310      | 0.2826    |
| 6   | A    | 245.2240   | 0.1993      | 1.6535    |
| 7   | A    | 260.6727   | 0.0492      | 256.4950  |
| 8   | A    | 304.1185   | 0.2664      | 3.2662    |
| 9   | A    | 323.2110   | 1.0325      | 4.4941    |
| 10  | A    | 367.3370   | 0.8125      | 5.8530    |
| 11  | A    | 376.3172   | 0.4834      | 0.6103    |
| 12  | A    | 448.1006   | 0.1420      | 4.3429    |
| 13  | A    | 456.6803   | 1.4709      | 0.2720    |
| 14  | A    | 506.4357   | 1.4209      | 0.1633    |
| 15  | A    | 518.5775   | 1.0870      | 1.1133    |
| 16  | A    | 540.8565   | 1.6097      | 4.6949    |
| 17  | A    | 603.6844   | 0.8288      | 3.9520    |

ESI-112



|    |   |           |         |          |
|----|---|-----------|---------|----------|
| 18 | A | 664.6650  | 2.2754  | 0.2926   |
| 19 | A | 676.3413  | 1.4313  | 4.3471   |
| 20 | A | 691.1798  | 2.1541  | 6.8710   |
| 21 | A | 747.4031  | 2.9818  | 0.1744   |
| 22 | A | 837.1776  | 0.6167  | 33.7771  |
| 23 | A | 848.9623  | 1.9509  | 60.0167  |
| 24 | A | 998.2478  | 2.5914  | 48.5714  |
| 25 | A | 1134.7214 | 4.5562  | 91.4145  |
| 26 | A | 1170.4997 | 1.6285  | 5.2550   |
| 27 | A | 1197.3863 | 1.2584  | 27.2239  |
| 28 | A | 1298.8489 | 9.3814  | 84.1005  |
| 29 | A | 1339.7313 | 7.1112  | 6.5644   |
| 30 | A | 1400.4076 | 11.1262 | 26.0475  |
| 31 | A | 1519.8864 | 6.8431  | 35.2495  |
| 32 | A | 1557.1471 | 8.5429  | 321.9502 |
| 33 | A | 1639.7085 | 2.8885  | 29.0029  |
| 34 | A | 1666.5065 | 5.6329  | 130.2485 |
| 35 | A | 1701.7369 | 11.8716 | 305.6373 |
| 36 | A | 2399.3840 | 42.9700 | 56.1379  |
| 37 | A | 3259.3032 | 6.8474  | 11.0008  |
| 38 | A | 3618.8256 | 8.0739  | 122.8317 |
| 39 | A | 3744.5092 | 9.1264  | 83.3107  |

-----

molE\_mp2

| NM# | Symm | Wavenumber | Force Const | IR Intens |
|-----|------|------------|-------------|-----------|
| 1   | A    | 78.3444    | 0.0551      | 1.8610    |
| 2   | A    | 120.0836   | 0.1048      | 4.2315    |
| 3   | A    | 131.9000   | 0.0883      | 4.4238    |
| 4   | A    | 181.2208   | 0.1984      | 0.2954    |
| 5   | A    | 215.6558   | 0.4138      | 0.2950    |
| 6   | A    | 240.2749   | 0.2098      | 0.6514    |
| 7   | A    | 298.0896   | 0.2606      | 2.1535    |
| 8   | A    | 319.2289   | 1.0744      | 1.5119    |
| 9   | A    | 358.3494   | 0.1803      | 5.3649    |
| 10  | A    | 364.7938   | 0.6424      | 4.9536    |
| 11  | A    | 389.0035   | 0.1588      | 11.2094   |
| 12  | A    | 444.6790   | 1.2881      | 0.4738    |
| 13  | A    | 463.4620   | 0.9277      | 2.6307    |
| 14  | A    | 489.6581   | 1.4177      | 2.3653    |
| 15  | A    | 528.5781   | 0.9754      | 32.3506   |
| 16  | A    | 546.9346   | 0.5393      | 43.5836   |
| 17  | A    | 582.8870   | 0.3626      | 235.6259  |
| 18  | A    | 621.0343   | 1.4689      | 5.4196    |
| 19  | A    | 662.5351   | 1.3936      | 2.9502    |
| 20  | A    | 682.8388   | 2.2210      | 5.6032    |
| 21  | A    | 793.8212   | 2.0182      | 2.0425    |
| 22  | A    | 826.0606   | 0.6242      | 27.1340   |
| 23  | A    | 844.2324   | 2.0354      | 67.4671   |
| 24  | A    | 996.1879   | 3.1806      | 44.2195   |
| 25  | A    | 1105.1121  | 5.5639      | 62.5251   |
| 26  | A    | 1193.7801  | 1.5292      | 20.2713   |
| 27  | A    | 1201.6885  | 1.1338      | 9.5268    |
| 28  | A    | 1279.5290  | 7.9838      | 50.2092   |

|    |   |           |         |          |
|----|---|-----------|---------|----------|
| 29 | A | 1368.1488 | 10.7743 | 9.5100   |
| 30 | A | 1466.7831 | 12.0805 | 12.6722  |
| 31 | A | 1507.7208 | 8.6891  | 54.9038  |
| 32 | A | 1526.8307 | 7.7893  | 277.7229 |
| 33 | A | 1627.2049 | 5.1975  | 9.8093   |
| 34 | A | 1658.6377 | 3.3866  | 48.2570  |
| 35 | A | 1685.1052 | 5.8565  | 200.3056 |
| 36 | A | 2178.7853 | 35.2477 | 2.1944   |
| 37 | A | 3256.4487 | 6.8354  | 6.0028   |
| 38 | A | 3589.9182 | 7.9555  | 70.8538  |
| 39 | A | 3710.8287 | 8.9304  | 51.6862  |

-----

molE\_pbe0d

-----

| NM# | Symm | Wavenumber | Force Const | IR Intens |
|-----|------|------------|-------------|-----------|
| 1   | A    | 79.0575    | 0.0582      | 0.9975    |
| 2   | A    | 126.4892   | 0.1160      | 4.7570    |
| 3   | A    | 132.5095   | 0.1347      | 1.2019    |
| 4   | A    | 185.3322   | 0.1867      | 0.5038    |
| 5   | A    | 217.4880   | 0.4249      | 0.3827    |
| 6   | A    | 241.4557   | 0.0394      | 241.5786  |
| 7   | A    | 246.6823   | 0.2731      | 4.9098    |
| 8   | A    | 299.5329   | 0.2482      | 3.5424    |
| 9   | A    | 322.0376   | 1.0473      | 2.9076    |
| 10  | A    | 366.9777   | 0.8191      | 5.6245    |
| 11  | A    | 373.9077   | 0.5087      | 0.5197    |
| 12  | A    | 453.7980   | 0.5869      | 0.4901    |
| 13  | A    | 456.4360   | 0.1751      | 2.9711    |
| 14  | A    | 504.1827   | 1.4289      | 0.1388    |
| 15  | A    | 519.7999   | 0.9868      | 1.0612    |
| 16  | A    | 541.2956   | 1.6342      | 4.6041    |
| 17  | A    | 600.8731   | 0.7816      | 4.1531    |
| 18  | A    | 664.9130   | 2.2827      | 0.1912    |
| 19  | A    | 677.8373   | 1.4096      | 4.3504    |
| 20  | A    | 690.9602   | 2.2095      | 6.6796    |
| 21  | A    | 758.6452   | 3.0047      | 0.0583    |
| 22  | A    | 825.1777   | 0.6105      | 32.2743   |
| 23  | A    | 847.1962   | 1.9034      | 61.8140   |
| 24  | A    | 995.7231   | 2.6621      | 49.1603   |
| 25  | A    | 1128.9687  | 4.6154      | 85.2069   |
| 26  | A    | 1169.9820  | 1.5640      | 4.6736    |
| 27  | A    | 1196.9561  | 1.2753      | 27.3690   |
| 28  | A    | 1296.7737  | 8.9312      | 76.6866   |
| 29  | A    | 1366.2416  | 9.3266      | 9.3269    |
| 30  | A    | 1405.7370  | 10.8432     | 40.5420   |
| 31  | A    | 1518.2933  | 6.7870      | 14.7442   |
| 32  | A    | 1548.2462  | 7.9556      | 316.5514  |
| 33  | A    | 1632.2231  | 4.0610      | 5.9630    |
| 34  | A    | 1658.6523  | 3.7974      | 137.1930  |
| 35  | A    | 1696.6588  | 10.2656     | 331.4366  |
| 36  | A    | 2357.2435  | 41.4214     | 67.6567   |
| 37  | A    | 3253.6269  | 6.8222      | 7.5956    |
| 38  | A    | 3632.1330  | 8.1339      | 106.8748  |
| 39  | A    | 3759.0483  | 9.1947      | 75.1814   |

-----  
 molE\_pbe  
 -----

| NM# | Symm | Wavenumber | Force Const | IR Intens |
|-----|------|------------|-------------|-----------|
| 1   | A    | 75.4147    | 0.0523      | 1.3536    |
| 2   | A    | 120.7338   | 0.1052      | 4.6939    |
| 3   | A    | 126.7798   | 0.1094      | 1.5485    |
| 4   | A    | 176.1903   | 0.1787      | 0.2287    |
| 5   | A    | 208.8713   | 0.3948      | 0.3467    |
| 6   | A    | 235.9971   | 0.2144      | 0.0513    |
| 7   | A    | 272.9908   | 0.0526      | 232.2068  |
| 8   | A    | 288.7609   | 0.2288      | 3.4449    |
| 9   | A    | 308.7818   | 0.8749      | 5.0337    |
| 10  | A    | 352.5956   | 0.5122      | 2.5759    |
| 11  | A    | 353.0928   | 0.7137      | 3.8711    |
| 12  | A    | 435.8268   | 1.0673      | 0.2023    |
| 13  | A    | 444.7886   | 0.1511      | 3.2253    |
| 14  | A    | 482.8682   | 1.3094      | 0.2343    |
| 15  | A    | 494.0430   | 0.7269      | 0.9707    |
| 16  | A    | 518.8418   | 1.4818      | 5.6988    |
| 17  | A    | 567.6689   | 0.6925      | 3.6332    |
| 18  | A    | 627.4807   | 2.0506      | 0.0938    |
| 19  | A    | 651.4820   | 1.3003      | 4.3663    |
| 20  | A    | 664.2380   | 2.1095      | 6.2517    |
| 21  | A    | 718.2990   | 2.8817      | 0.0212    |
| 22  | A    | 776.5870   | 0.5315      | 29.4013   |
| 23  | A    | 809.3658   | 1.8387      | 68.6550   |
| 24  | A    | 949.4483   | 2.4766      | 46.3889   |
| 25  | A    | 1075.2649  | 4.5252      | 76.8456   |
| 26  | A    | 1128.0706  | 1.4115      | 8.0185    |
| 27  | A    | 1153.4051  | 1.1731      | 30.2813   |
| 28  | A    | 1236.3639  | 8.2354      | 69.5712   |
| 29  | A    | 1307.6986  | 9.5467      | 15.7443   |
| 30  | A    | 1369.9633  | 9.7616      | 27.5991   |
| 31  | A    | 1453.0690  | 6.4564      | 17.9329   |
| 32  | A    | 1475.9203  | 7.1229      | 274.7526  |
| 33  | A    | 1554.1338  | 6.8803      | 17.5688   |
| 34  | A    | 1589.5172  | 2.6765      | 83.6146   |
| 35  | A    | 1623.1799  | 6.4223      | 319.8999  |
| 36  | A    | 2235.5048  | 37.2152     | 60.4479   |
| 37  | A    | 3165.1581  | 6.4494      | 6.2977    |
| 38  | A    | 3514.4608  | 7.6141      | 88.3733   |
| 39  | A    | 3636.5636  | 8.5984      | 63.9475   |

-----

molE\_rtpss  
 -----

| NM# | Symm | Wavenumber | Force Const | IR Intens |
|-----|------|------------|-------------|-----------|
| 1   | A    | 76.7884    | 0.0528      | 2.1667    |
| 2   | A    | 119.1503   | 0.1020      | 4.6866    |
| 3   | A    | 130.7154   | 0.0942      | 3.8258    |
| 4   | A    | 177.1707   | 0.1840      | 0.2135    |
| 5   | A    | 205.2459   | 0.3856      | 0.2645    |

|    |   |           |         |          |
|----|---|-----------|---------|----------|
| 6  | A | 237.2460  | 0.2066  | 0.4867   |
| 7  | A | 282.4912  | 0.2159  | 3.3636   |
| 8  | A | 305.4277  | 0.9556  | 0.9385   |
| 9  | A | 351.8380  | 0.7146  | 4.4401   |
| 10 | A | 352.6050  | 0.4070  | 5.5642   |
| 11 | A | 407.8763  | 0.1294  | 252.3382 |
| 12 | A | 428.4988  | 0.1579  | 7.1721   |
| 13 | A | 436.0069  | 0.4989  | 14.0537  |
| 14 | A | 482.2209  | 1.2735  | 1.2932   |
| 15 | A | 492.7302  | 1.0069  | 0.8394   |
| 16 | A | 521.7991  | 1.2497  | 14.6269  |
| 17 | A | 570.2376  | 0.7797  | 4.1005   |
| 18 | A | 625.8635  | 2.1753  | 0.1107   |
| 19 | A | 650.6720  | 1.3209  | 4.0272   |
| 20 | A | 666.7571  | 2.1682  | 6.8683   |
| 21 | A | 702.8740  | 3.0860  | 0.3218   |
| 22 | A | 794.9717  | 0.5244  | 28.1007  |
| 23 | A | 813.6315  | 1.9886  | 78.5095  |
| 24 | A | 954.7935  | 2.7284  | 44.9525  |
| 25 | A | 1077.2869 | 5.2238  | 68.8340  |
| 26 | A | 1151.2692 | 1.4603  | 20.2021  |
| 27 | A | 1175.5584 | 1.1692  | 30.4010  |
| 28 | A | 1239.9836 | 8.3666  | 65.5402  |
| 29 | A | 1312.3721 | 9.4884  | 13.2325  |
| 30 | A | 1375.9116 | 9.3659  | 25.1194  |
| 31 | A | 1464.1673 | 7.0445  | 17.5625  |
| 32 | A | 1485.2825 | 7.2036  | 289.0086 |
| 33 | A | 1571.0338 | 9.6866  | 27.3887  |
| 34 | A | 1619.5061 | 3.9378  | 71.6431  |
| 35 | A | 1646.5432 | 3.1017  | 260.7425 |
| 36 | A | 2249.8172 | 37.7029 | 57.3081  |
| 37 | A | 3194.7717 | 6.5713  | 2.7730   |
| 38 | A | 3502.9562 | 7.5680  | 58.4015  |
| 39 | A | 3619.5605 | 8.5057  | 46.0541  |

-----

molE\_wb97xd

| NM# | Symm | Wavenumber | Force Const | IR Intens |
|-----|------|------------|-------------|-----------|
| 1   | A    | 79.1178    | 0.0585      | 0.7703    |
| 2   | A    | 130.2476   | 0.1353      | 2.5031    |
| 3   | A    | 132.0244   | 0.1348      | 3.9956    |
| 4   | A    | 186.7232   | 0.1743      | 1.1154    |
| 5   | A    | 216.0103   | 0.0329      | 244.7377  |
| 6   | A    | 218.7510   | 0.3677      | 4.4042    |
| 7   | A    | 247.1426   | 0.2352      | 0.0589    |
| 8   | A    | 306.4851   | 0.2677      | 3.3982    |
| 9   | A    | 323.1487   | 1.0925      | 2.4058    |
| 10  | A    | 367.7599   | 0.8302      | 5.9836    |
| 11  | A    | 376.4089   | 0.4653      | 0.6290    |
| 12  | A    | 446.9614   | 0.1423      | 3.3253    |
| 13  | A    | 456.9842   | 1.4674      | 0.3430    |
| 14  | A    | 504.6757   | 1.4380      | 0.1069    |
| 15  | A    | 520.0414   | 1.0842      | 1.1517    |
| 16  | A    | 539.6490   | 1.6190      | 4.3146    |

|    |   |           |         |          |
|----|---|-----------|---------|----------|
| 17 | A | 607.3459  | 0.8056  | 3.8711   |
| 18 | A | 670.4956  | 2.4163  | 0.2402   |
| 19 | A | 680.1459  | 1.4851  | 4.3829   |
| 20 | A | 689.7386  | 2.0905  | 7.9576   |
| 21 | A | 764.4227  | 2.7264  | 0.0082   |
| 22 | A | 841.5543  | 0.6454  | 33.3679  |
| 23 | A | 843.7462  | 1.9640  | 63.8172  |
| 24 | A | 990.8058  | 2.7038  | 47.3053  |
| 25 | A | 1124.7600 | 5.0760  | 92.6338  |
| 26 | A | 1169.2173 | 1.6613  | 15.4638  |
| 27 | A | 1204.2099 | 1.2154  | 28.2982  |
| 28 | A | 1287.4266 | 9.2736  | 86.2303  |
| 29 | A | 1340.9423 | 7.6187  | 6.6230   |
| 30 | A | 1389.8149 | 10.7707 | 33.1413  |
| 31 | A | 1516.3027 | 7.0813  | 32.3236  |
| 32 | A | 1546.6717 | 8.0588  | 309.3437 |
| 33 | A | 1639.2562 | 4.6085  | 5.1170   |
| 34 | A | 1665.7303 | 3.3861  | 138.6921 |
| 35 | A | 1700.5179 | 9.4737  | 329.6088 |
| 36 | A | 2372.6239 | 41.9992 | 63.1016  |
| 37 | A | 3248.9618 | 6.8050  | 6.2628   |
| 38 | A | 3640.3260 | 8.1707  | 103.7914 |
| 39 | A | 3765.9452 | 9.2301  | 71.9242  |

-----

molE\_x31yp

| NM# | Symm | Wavenumber | Force Const | IR Intens |
|-----|------|------------|-------------|-----------|
| 1   | A    | 78.6431    | 0.0575      | 1.0017    |
| 2   | A    | 128.3059   | 0.1214      | 4.3081    |
| 3   | A    | 131.4337   | 0.1336      | 1.6306    |
| 4   | A    | 183.7062   | 0.1824      | 0.4016    |
| 5   | A    | 215.5307   | 0.4124      | 0.4592    |
| 6   | A    | 235.6712   | 0.0393      | 243.1959  |
| 7   | A    | 246.5991   | 0.2105      | 0.7031    |
| 8   | A    | 301.9462   | 0.2541      | 3.4549    |
| 9   | A    | 318.2993   | 1.0575      | 2.6382    |
| 10  | A    | 363.5892   | 0.8286      | 6.4759    |
| 11  | A    | 369.2523   | 0.5152      | 0.3847    |
| 12  | A    | 451.5594   | 0.1719      | 2.6609    |
| 13  | A    | 453.4834   | 0.5670      | 1.0653    |
| 14  | A    | 499.1527   | 1.3946      | 0.1304    |
| 15  | A    | 513.8700   | 0.9555      | 1.0316    |
| 16  | A    | 532.5962   | 1.5667      | 4.6984    |
| 17  | A    | 596.7380   | 0.7616      | 3.8231    |
| 18  | A    | 660.7417   | 2.3796      | 0.2734    |
| 19  | A    | 673.6381   | 1.4170      | 5.1362    |
| 20  | A    | 683.3509   | 2.1477      | 7.5133    |
| 21  | A    | 759.2935   | 2.7520      | 0.0157    |
| 22  | A    | 827.8109   | 0.6220      | 31.6351   |
| 23  | A    | 831.1592   | 1.9820      | 69.3574   |
| 24  | A    | 974.4208   | 2.6342      | 46.5969   |
| 25  | A    | 1105.1592  | 5.1444      | 86.3504   |
| 26  | A    | 1159.7585  | 1.6243      | 19.0245   |
| 27  | A    | 1196.0210  | 1.2095      | 30.6537   |

ESI-117

|    |   |           |         |          |
|----|---|-----------|---------|----------|
| 28 | A | 1270.5515 | 8.9858  | 74.5364  |
| 29 | A | 1331.5444 | 8.3882  | 6.8576   |
| 30 | A | 1372.8191 | 9.8586  | 32.0407  |
| 31 | A | 1490.6643 | 7.3527  | 38.0062  |
| 32 | A | 1518.2752 | 7.4755  | 296.1858 |
| 33 | A | 1605.5284 | 9.0242  | 26.6075  |
| 34 | A | 1644.6810 | 3.0596  | 75.8848  |
| 35 | A | 1670.7412 | 4.7452  | 339.3517 |
| 36 | A | 2332.5982 | 40.5894 | 65.1067  |
| 37 | A | 3233.8781 | 6.7358  | 6.5937   |
| 38 | A | 3603.2541 | 8.0017  | 105.4098 |
| 39 | A | 3724.1512 | 9.0268  | 70.3328  |

---

Performance of the different levels of theory. Standard deviations (std dev), intercepts ( $a_0$ ), slopes ( $a_1$ ) and correlation coefficients ( $R^2$ ) as obtained upon least squares linear regression of the computed values of the vibrational wavenumbers vs the experimental values. N indicates the number of matching normal modes.

|                            | APF[D]  | B3LYP[D] | BLYP    | CAM-B3LYP[D] | M06-2X  | PBE     | PBE0[D] | RevTPSS | wB97-X[D] | X3LYP   | MP2     |
|----------------------------|---------|----------|---------|--------------|---------|---------|---------|---------|-----------|---------|---------|
| N                          | 48      | 49       | 46      | 47           | 49      | 48      | 48      | 51      | 46        | 48      | 49      |
| std dev / $\text{cm}^{-1}$ | 69.8    | 61.5     | 30.9    | 79.9         | 78.8    | 73.0    | 26.0    | 19.1    | 79.2      | 69.8    | 49.6    |
| $a_0 / \text{cm}^{-1}$     | -15.9   | 1.6      | 0.7     | -15.5        | -18.2   | -13.8   | -21.3   | -11.8   | -17.3     | -15.9   | -0.3    |
| $a_1$                      | 1.02053 | 1.00902  | 0.99341 | 1.02460      | 1.02463 | 1.02292 | 1.00646 | 1.00428 | 1.02532   | 1.02053 | 1.00112 |
| $R^2$                      | 0.99728 | 0.99773  | 0.99939 | 0.99679      | 0.99662 | 0.99724 | 0.99960 | 0.99974 | 0.99687   | 0.99728 | 0.99833 |

Calculated  $S_n \leftarrow S_0$  ( $n = 1$  to  $5$ ) excitation wavelengths (in nm) at different levels of theory.

| Functional        | A      |        |        |        |        | B      |        |        |        |        | C      |        |        |        |        | D      |        |        |        |        | E      |        |        |        |        |        |        |
|-------------------|--------|--------|--------|--------|--------|--------|--------|--------|--------|--------|--------|--------|--------|--------|--------|--------|--------|--------|--------|--------|--------|--------|--------|--------|--------|--------|--------|
|                   | S1-S0  | S2-S0  | S3-S0  | S4-S0  | S5-S0  | S1-S0  | S2-S0  | S3-S0  | S4-S0  | S5-S0  | S1-S0  | S2-S0  | S3-S0  | S4-S0  | S5-S0  | S1-S0  | S2-S0  | S3-S0  | S4-S0  | S5-S0  | S1-S0  | S2-S0  | S3-S0  | S4-S0  | S5-S0  |        |        |
| B3LYP[D]          | 252.29 | 250.14 | 244.45 | 219.76 | 208.94 | 240.39 | 212.37 | 209.97 | 256.80 | 245.50 | 244.73 | 208.90 | 208.02 | 259.61 | 237.10 | 223.08 | 220.88 | 286.47 | 239.31 | 228.60 | 219.37 | 228.77 | 238.92 | 230.03 | 214.83 | 210.71 |        |
| (TD) 6-31+G**     | 250.45 | 249.88 | 232.45 | 219.14 | 208.77 | 241.58 | 201.67 | 201.01 | 252.75 | 244.73 | 234.71 | 207.80 | 207.19 | 259.00 | 237.10 | 223.08 | 220.88 | 286.47 | 239.31 | 228.60 | 219.37 | 228.77 | 238.92 | 230.03 | 214.83 | 210.71 |        |
| (TD) 6-31++G**    | 254.09 | 249.97 | 245.75 | 219.40 | 209.78 | 258.21 | 243.38 | 241.77 | 214.60 | 211.72 | 258.54 | 246.80 | 245.54 | 210.17 | 208.59 | 201.22 | 258.15 | 238.92 | 224.16 | 219.44 | 288.44 | 240.39 | 238.85 | 243.38 | 215.23 | 210.58 |        |
| (TDA) 6-31++G**   | 252.24 | 249.38 | 233.63 | 218.80 | 208.19 | 231.87 | 214.09 | 206.05 | 254.51 | 245.59 | 235.74 | 208.48 | 207.83 | 290.84 | 257.53 | 229.80 | 223.84 | 288.44 | 238.46 | 218.72 | 288.44 | 240.39 | 238.85 | 243.38 | 215.23 | 210.58 |        |
| (TD) Aug-cc-pVDZ  | 254.83 | 253.49 | 246.47 | 222.69 | 210.98 | 259.32 | 247.00 | 242.80 | 216.75 | 213.42 | 259.48 | 250.20 | 246.71 | 212.10 | 211.00 | 203.86 | 260.64 | 239.80 | 227.16 | 220.86 | 290.65 | 241.70 | 241.36 | 244.42 | 217.52 | 212.23 |        |
| (TD) Aug-cc-pVTZ  | 284.44 | 252.93 | 234.32 | 222.09 | 209.37 | 256.09 | 246.57 | 232.56 | 216.26 | 212.57 | 255.36 | 249.29 | 236.38 | 210.17 | 202.35 | 260.00 | 230.70 | 226.80 | 220.16 | 228.64 | 241.28 | 241.28 | 223.53 | 245.72 | 211.79 | 212.58 |        |
| (TDA) Aug-cc-pVTZ | 254.84 | 252.76 | 246.90 | 222.56 | 211.10 | 259.34 | 246.34 | 246.34 | 216.92 | 213.72 | 259.67 | 249.54 | 247.02 | 212.10 | 211.13 | 204.54 | 260.25 | 240.73 | 227.11 | 221.01 | 291.16 | 242.29 | 241.37 | 218.20 | 212.58 | 212.58 |        |
| (TD) Aug-cc-pVTZ  | 252.90 | 252.19 | 234.75 | 221.94 | 209.44 | 256.03 | 245.89 | 232.97 | 216.42 | 209.19 | 255.40 | 248.97 | 236.82 | 211.31 | 210.33 | 235.85 | 259.60 | 231.51 | 226.78 | 220.25 | 283.02 | 240.99 | 233.35 | 218.07 | 212.07 | 212.07 |        |
| BLYP              | 281.59 | 274.22 | 261.62 | 249.25 | 234.92 | 277.30 | 269.07 | 253.32 | 235.16 | 226.46 | 276.99 | 274.12 | 263.46 | 234.90 | 232.23 | 328.57 | 299.90 | 254.27 | 252.89 | 247.04 | 270.62 | 255.68 | 242.09 | 237.48 | 237.48 | 237.48 | 237.48 |
| (TD) 6-31+G**     | 280.97 | 272.13 | 248.73 | 247.34 | 234.82 | 274.18 | 268.56 | 244.72 | 234.91 | 232.58 | 273.66 | 272.90 | 250.52 | 234.57 | 232.07 | 316.62 | 299.28 | 252.78 | 246.38 | 243.38 | 304.07 | 270.24 | 244.73 | 241.97 | 237.48 | 237.48 |        |
| (TD) 6-31++G**    | 281.21 | 275.88 | 262.59 | 249.23 | 233.77 | 279.30 | 253.53 | 258.42 | 238.09 | 235.65 | 278.72 | 275.23 | 264.20 | 235.85 | 233.12 | 345.95 | 297.20 | 255.88 | 253.11 | 245.95 | 314.44 | 269.01 | 256.97 | 242.00 | 237.89 | 237.89 |        |
| (TDA) 6-31++G**   | 280.65 | 273.92 | 248.74 | 248.16 | 233.67 | 276.26 | 271.02 | 245.74 | 237.05 | 245.74 | 251.19 | 235.64 | 232.96 | 238.96 | 232.06 | 296.69 | 252.99 | 245.32 | 244.73 | 306.06 | 268.68 | 246.09 | 241.89 | 237.86 | 237.86 | 237.86 |        |
| (TD) Aug-cc-pVDZ  | 285.46 | 276.71 | 263.32 | 253.53 | 235.08 | 280.80 | 276.00 | 259.23 | 240.45 | 239.35 | 280.52 | 279.18 | 264.88 | 240.05 | 235.33 | 333.56 | 299.32 | 256.95 | 255.58 | 247.43 | 317.00 | 271.43 | 258.20 | 244.53 | 239.07 | 239.07 |        |
| (TD) Aug-cc-pVTZ  | 284.84 | 274.56 | 253.03 | 248.82 | 234.98 | 278.29 | 274.87 | 246.48 | 240.29 | 238.68 | 279.69 | 275.41 | 251.85 | 239.73 | 235.18 | 321.41 | 298.65 | 255.75 | 246.90 | 246.26 | 308.18 | 271.02 | 247.01 | 244.42 | 238.96 | 238.96 |        |
| (TDA) Aug-cc-pVTZ | 284.44 | 275.58 | 263.56 | 252.99 | 235.12 | 280.60 | 275.30 | 259.43 | 240.64 | 238.96 | 280.03 | 276.88 | 265.10 | 235.50 | 234.15 | 299.24 | 257.63 | 255.68 | 247.64 | 271.56 | 315.56 | 259.06 | 245.72 | 239.06 | 239.06 | 239.06 |        |
| (TD) Aug-cc-pVTZ  | 283.88 | 274.44 | 252.49 | 249.10 | 235.01 | 277.85 | 274.37 | 246.80 | 240.44 | 238.3  | 278.81 | 275.38 | 252.18 | 239.20 | 235.36 | 321.90 | 298.68 | 255.69 | 247.09 | 246.55 | 308.54 | 271.22 | 247.83 | 245.61 | 238.87 | 238.87 |        |
| CAM-B3LYP[D]      | 241.00 | 234.18 | 231.95 | 204.44 | 194.67 | 245.15 | 230.99 | 224.14 | 198.44 | 196.32 | 245.77 | 234.10 | 228.39 | 195.58 | 193.66 | 281.34 | 234.92 | 226.74 | 203.17 | 270.71 | 228.06 | 220.37 | 228.06 | 220.37 | 196.59 | 196.59 |        |
| (TD) 6-31+G**     | 238.36 | 231.34 | 223.75 | 203.72 | 192.03 | 241.20 | 223.81 | 222.18 | 197.68 | 188.71 | 241.10 | 227.86 | 225.11 | 193.16 | 190.77 | 271.03 | 234.25 | 218.88 | 204.84 | 202.42 | 262.45 | 220.54 | 219.92 | 196.10 | 193.35 | 193.35 |        |
| (TD) 6-31++G**    | 243.01 | 235.79 | 231.37 | 203.65 | 189.95 | 247.21 | 225.75 | 225.07 | 200.20 | 198.03 | 247.66 | 235.71 | 228.52 | 197.01 | 193.65 | 283.82 | 233.94 | 218.88 | 206.15 | 202.84 | 272.82 | 229.93 | 220.24 | 199.86 | 196.39 | 196.39 |        |
| (TDA) 6-31++G**   | 240.31 | 230.75 | 225.20 | 202.92 | 191.69 | 243.20 | 225.03 | 223.47 | 199.55 | 188.8  | 242.98 | 228.07 | 226.41 | 193.20 | 191.59 | 273.40 | 233.26 | 220.70 | 205.65 | 202.00 | 264.51 | 222.21 | 219.79 | 195.94 | 193.17 | 193.17 |        |
| (TD) Aug-cc-pVDZ  | 244.03 | 236.69 | 234.37 | 206.35 | 192.23 | 248.57 | 233.50 | 228.44 | 202.25 | 199.92 | 248.89 | 236.43 | 231.94 | 198.53 | 196.34 | 286.64 | 236.62 | 229.85 | 208.66 | 204.35 | 275.19 | 231.10 | 223.13 | 201.53 | 198.35 | 198.35 |        |
| (TD) Aug-cc-pVTZ  | 241.29 | 233.78 | 226.07 | 205.61 | 191.99 | 244.51 | 228.22 | 224.49 | 201.35 | 191.35 | 244.12 | 231.50 | 227.23 | 195.90 | 193.90 | 276.09 | 235.93 | 228.22 | 208.22 | 206.82 | 266.82 | 223.37 | 222.69 | 197.93 | 197.93 |        |        |
| (TDA) Aug-cc-pVTZ | 244.07 | 237.20 | 233.73 | 206.40 | 192.46 | 248.64 | 233.87 | 227.79 | 202.34 | 200.26 | 249.12 | 236.85 | 231.29 | 198.86 | 196.36 | 287.32 | 236.25 | 230.79 | 208.39 | 204.49 | 275.72 | 231.98 | 222.78 | 201.93 | 198.61 | 198.61 |        |
| (TD) Aug-cc-pVTZ  | 241.27 | 233.13 | 226.56 | 205.64 | 192.23 | 244.49 | 227.58 | 224.90 | 201.65 | 191.84 | 244.21 | 230.84 | 226.61 | 195.90 | 194.32 | 276.61 | 235.55 | 222.61 | 207.93 | 203.57 | 267.22 | 224.16 | 222.34 | 198.15 | 193.94 | 193.94 |        |
| PBE0[D]           | 246.81 | 239.97 | 239.65 | 211.92 | 203.35 | 250.72 | 236.15 | 229.95 | 205.81 | 203.11 | 251.52 | 240.17 | 234.42 | 204.01 | 200.52 | 292.71 | 250.42 | 232.29 | 215.01 | 213.18 | 280.49 | 233.86 | 230.01 | 207.23 | 203.67 | 203.67 |        |
| (TD) 6-31+G**     | 244.92 | 239.21 | 228.33 | 211.24 | 202.43 | 247.43 | 229.70 | 226.35 | 203.33 | 196.92 | 247.31 | 234.01 | 230.38 | 200.29 | 199.40 | 282.46 | 249.78 | 233.78 | 214.68 | 212.46 | 272.57 | 229.62 | 225.62 | 207.03 | 203.40 | 203.40 |        |
| (TD) 6-31++G**    | 248.44 | 241.19 | 239.97 | 211.94 | 204.78 | 252.46 | 237.61 | 231.86 | 207.35 | 205.75 | 253.07 | 241.41 | 235.55 | 205.26 | 201.56 | 294.79 | 249.58 | 235.99 | 215.97 | 212.95 | 282.29 | 235.44 | 229.86 | 207.56 | 204.66 | 204.66 |        |
| (TDA) 6-31++G**   | 246.52 | 239.49 | 229.45 | 211.27 | 202.18 | 249.14 | 231.76 | 227.53 | 206.10 | 197.79 | 248.89 | 235.21 | 231.35 | 201.35 | 199.90 | 284.50 | 248.91 | 235.33 | 215.65 | 212.20 | 274.35 | 229.46 | 227.05 | 207.37 | 203.79 | 203.79 |        |
| (TD) Aug-cc-pVDZ  | 249.38 | 245.24 | 241.74 | 214.78 | 206.07 | 253.66 | 238.38 | 235.43 | 209.32 | 207.6  | 254.13 | 242.07 | 239.08 | 206.61 | 203.59 | 297.80 | 251.93 | 235.02 | 218.59 | 214.38 | 284.85 | 236.55 | 232.41 | 209.94 | 206.26 | 206.26 |        |
| (TD) Aug-cc-pVTZ  | 247.43 | 242.59 | 230.18 | 214.11 | 202.90 | 250.32 | 235.40 | 228.29 | 208.11 | 200.24 | 249.88 | 238.84 | 232.02 | 203.30 | 202.47 | 287.37 | 251.26 | 226.31 | 213.62 | 216.76 | 276.83 | 233.01 | 228.13 | 209.77 | 204.64 | 204.64 |        |
| (TDA) Aug-cc-pVTZ | 249.37 | 242.66 | 241.93 | 214.68 | 206.20 | 253.65 | 238.60 | 234.75 | 209.50 | 207.73 | 254.31 | 242.33 | 238.36 | 206.88 | 203.51 | 298.43 | 251.32 | 235.94 | 218.39 | 214.36 | 285.27 | 237.44 | 231.94 | 210.26 | 206.64 | 206.64 |        |
| (TD) Aug-cc-pVTZ  | 247.34 | 241.76 | 230.58 | 213.99 | 202.88 | 250.21 | 234.64 | 228.65 | 208.10 | 200.21 | 249.89 | 238.06 | 232.42 | 203.22 | 202.39 | 287.82 | 250.63 | 227.13 | 218.09 | 213.54 | 277.13 | 231.54 | 228.93 | 210.09 | 204.67 | 204.67 |        |
| PBE               | 275.95 | 273.18 | 260.25 | 245.04 | 233.19 | 275.66 | 261.78 | 255.70 | 233.88 | 229.37 | 275.55 | 267.29 | 262.09 | 229.85 | 229.18 | 328.35 | 316.14 | 298.29 | 252.57 | 251.40 | 344.69 | 312.08 | 267.05 | 253.99 | 240.22 | 23     |        |
